# Supplementary material for: Photoluminescence of Ni(II), Pd(II), and Pt(II) Complexes [M(Me2dpb)Cl] Obtained from C‒H Activation of 1,5-Di(2-pyridyl)-2,4-dimethylbenzene (Me2dpbH)
Source: MDPI journal article supplement (doi:10.3390/molecules26165051), 2021-08-20
Supplement: s1 [file s1]

## Supplementary Materials I

for

### Photoluminescence of Ni(II), Pd(II), and Pt(II) complexes [M(Me<sub>2</sub>dpb)Cl] obtained from C–H activation of 1,5-di(2-pyridyl)-2,4-dimethylbenzene (Me<sub>2</sub>dpbH)

#### Contents:

#### Syntheses

**Scheme S1.** Overview over attempted syntheses of Pd(II) complexes.

**Synthesis of [Pd<sub>4</sub>(μ-κ<sup>2</sup>,κ<sup>2</sup>dpb)<sub>2</sub>(μ-κ<sup>1</sup>,κ<sup>1</sup>-OAc)<sub>4</sub>]** using PdCl<sub>2</sub>.

**Synthesis of [Pd<sub>4</sub>(μ-κ<sup>2</sup>,κ<sup>2</sup>dpb)<sub>2</sub>(μ-κ<sup>1</sup>,κ<sup>1</sup>-OAc)<sub>4</sub>]** using [Pd(COD)Cl<sub>2</sub>].

**Synthesis of [Pd<sub>4</sub>(μ-κ<sup>2</sup>,κ<sup>2</sup>dpb)<sub>2</sub>(μ-κ<sup>1</sup>,κ<sup>1</sup>-OPiv)<sub>4</sub>]** using [Pd(COD)Cl<sub>2</sub>].

#### Photophysical characterisation

#### Supplementary Figures and Tables

**Figure S1.** Ellipsoid visualisation of the asymmetric unit of [Ni(Me<sub>2</sub>dpb)Cl]·CH<sub>2</sub>Cl<sub>2</sub> at 50% probability and view on the crystal structure along the crystallographic *b/c* axis.

**Figure S2.** View on the crystal structure of [Ni(Me<sub>2</sub>dpb)Cl]·CH<sub>2</sub>Cl<sub>2</sub> along the crystallographic *c* axis and close-up of the stacking of the molecules.

**Figure S3.** View on the crystal structure of [Ni(Me<sub>2</sub>dpb)Cl]·CH<sub>2</sub>Cl<sub>2</sub> along the crystallographic *b* axis.

**Figure S4.** Ellipsoid visualisation of the asymmetric unit of [Pd(Me<sub>2</sub>dpb)Cl] at 50% probability.

**Figure S5.** View on the crystal structure of [Pd(Me<sub>2</sub>dpb)Cl] along the crystallographic *a* axis.

**Figure S6.** View on the crystal structure of [Pd(Me<sub>2</sub>dpb)Cl] along the crystallographic *b* axis.

**Figure S7.** Cyclic voltammograms of Me<sub>2</sub>dpbH in THF/*n*-Bu<sub>4</sub>NPF<sub>6</sub>.

**Figure S8.** Contour plots and energies of selected DFT-calculated molecular orbitals of [M(Me<sub>2</sub>dpb)Cl] (M = Ni, Pd, Pt).

**Figure S9.** TD-DFT-calculated absorptions spectrum of [Pd(Me<sub>2</sub>dpb)Cl].

**Figure S10.** UV-vis absorption spectra of [Pd(Me<sub>2</sub>dpb)Cl] in THF/*n*-Bu<sub>4</sub>NPF<sub>6</sub> recorded during cathodic reduction (A) and anodic oxidation (B).

**Figure S11.** UV-vis absorption spectra of [Ni(Me<sub>2</sub>dpb)Cl] in THF/*n*-Bu<sub>4</sub>NPF<sub>6</sub> recorded during cathodic reduction and anodic oxidation.

**Figure S12.** Normalised photoluminescence excitation and emission spectra of [Pt(dpb)Cl] in DCM and 2-MeTHF at 298 K and in frozen glassy matrices of 2-MeTHF at 77 K.

**Figure S13.** Normalised photoluminescence excitation and emission spectra of [Pt(Me<sub>2</sub>dpb)Cl] in DCM and 2-MeTHF at 298 K and in frozen glassy matrices of 2-MeTHF at 77 K.

**Figure S14.** Normalised photoluminescence excitation and emission spectra of [Pd(Me<sub>2</sub>dpb)Cl] in frozen glassy matrices of 2-MeTHF at 77 K.

**Figure S15.** Time-resolved photoluminescence decay of [Pt(dpb)Cl] in air-equilibrated DCM at 298 K, including the residuals (λ<sub>exc</sub> = 376.7 nm, λ<sub>em</sub> = 490 nm).

**Figure S16.** Time-resolved photoluminescence decay of [Pt(dpb)Cl] in deaerated DCM at 298 K, including the residuals (λ<sub>exc</sub> = 376.7 nm, λ<sub>em</sub> = 490 nm).

**Figure S17.** Time-resolved photoluminescence decay of [Pt(dpb)Cl] in air-equilibrated 2-MeTHF at 298 K, including the residuals (λ<sub>exc</sub> = 376.7 nm, λ<sub>em</sub> = 490 nm).

**Figure S18.** Time-resolved photoluminescence decay of [Pt(dpb)Cl] in deaerated 2-MeTHF at 298 K, including the residuals (λ<sub>exc</sub> = 376.7 nm, λ<sub>em</sub> = 490 nm).

**Figure S19.** Time-resolved photoluminescence decay of [Pt(dpb)Cl] in a frozen glassy matrix of 2-MeTHF at 77 K, including the residuals (λ<sub>exc</sub> = 376.7 nm, λ<sub>em</sub> = 490 nm).

**Figure S20.** Time-resolved photoluminescence decay of [Pt(Me<sub>2</sub>dpb)Cl] in air-equilibrated DCM at 298 K, including the residuals (λ<sub>exc</sub> = 376.7 nm, λ<sub>em</sub> = 490 nm).

**Figure S21.** Time-resolved photoluminescence decay of [Pt(Me<sub>2</sub>dpb)Cl] in deaerated DCM at 298 K, including the residuals (λ<sub>exc</sub> = 376.7 nm, λ<sub>em</sub> = 490 nm).

**Figure S22.** Time-resolved photoluminescence decay of [Pt(Me<sub>2</sub>dpb)Cl] in air-equilibrated 2-MeTHF at 298 K, including the residuals (λ<sub>exc</sub> = 376.7 nm, λ<sub>em</sub> = 490 nm).

**Figure S23.** Time-resolved photoluminescence decay of [Pt(Me<sub>2</sub>dpb)Cl] in deaerated 2-MeTHF at 298 K, including the residuals (λ<sub>exc</sub> = 376.7 nm, λ<sub>em</sub> = 490 nm).

**Figure S24.** Time-resolved photoluminescence decay of [Pt(Me<sub>2</sub>dpb)Cl] in a frozen glassy matrix of 2-MeTHF at 77 K, including the residuals (λ<sub>exc</sub> = 376.7 nm, λ<sub>em</sub> = 485 nm).

**Figure S25.** Time-resolved photoluminescence decay of [Pd(Me<sub>2</sub>dpb)Cl] in a frozen glassy matrix of 2-MeTHF at 77 K, including the residuals (λ<sub>exc</sub> = 376.7 nm, λ<sub>em</sub> = 470 nm).

**Table S1.** Crystal data and structure refinement for the [M(Me<sub>2</sub>dpb)Cl] compounds.<sup>a</sup>

**Table S2.** Selected DFT-optimised geometrical data of the complex [Ni(Me<sub>2</sub>dpb)Cl] compared with experimental data from the crystal structure of [Ni(Me<sub>2</sub>dpb)Cl]·CH<sub>2</sub>Cl<sub>2</sub>.

**Table S3.** Selected DFT-optimised geometrical data of the complex [Pd(Me<sub>2</sub>dpb)Cl] compared with experimental data from the crystal structure of [Pd(Me<sub>2</sub>dpb)Cl]·CH<sub>2</sub>Cl<sub>2</sub>.

**Table S4.** Selected DFT-optimised geometrical data of the complex [Pt(Me<sub>2</sub>dpb)Cl] compared with experimental data from the crystal structure of [Pt(Me<sub>2</sub>dpb)Cl]·CH<sub>2</sub>Cl<sub>2</sub>.

**Table S5.** Selected absorption maxima for Me<sub>2</sub>dpbH and the complexes [M(Me<sub>2</sub>dpb)Cl] (M = Ni, Pd, Pt).

**Table S6.** Selected TD-DFT calculated vertical S<sub>0</sub>→S<sub>n</sub> transitions for [Pt(Me<sub>2</sub>dpb)Cl].

**Table S7.** Selected TD-DFT calculated vertical S<sub>0</sub>→S<sub>n</sub> transitions for [Pd(Me<sub>2</sub>dpb)Cl].

**Table S8.** Selected TD-DFT calculated vertical S<sub>0</sub>→S<sub>n</sub> transitions for [Ni(Me<sub>2</sub>dpb)Cl].

**Table S9.** Selected UV-vis absorption maxima of the reduced and oxidised complexes [M(Me<sub>2</sub>dpb)Cl]<sup>n</sup>.

**Table S10.** Fractional atomic coordinates (×10<sup>4</sup>) and equivalent isotropic displacement parameters (Å<sup>2</sup>×10<sup>3</sup>) for [Ni(Me<sub>2</sub>dpb)Cl]·CH<sub>2</sub>Cl<sub>2</sub>.

**Table S11.** Anisotropic displacement parameters (Å<sup>2</sup>×10<sup>3</sup>) for [Ni(Me<sub>2</sub>dpb)Cl]·CH<sub>2</sub>Cl<sub>2</sub>.

**Table S12.** Selected bond lengths for [Ni(Me<sub>2</sub>dpb)Cl]·CH<sub>2</sub>Cl<sub>2</sub>.

**Table S13.** Selected bond angles for [Ni(Me<sub>2</sub>dpb)Cl]·CH<sub>2</sub>Cl<sub>2</sub>.

**Table S14.** Selected torsion angles for [Ni(Me<sub>2</sub>dpb)Cl]·CH<sub>2</sub>Cl<sub>2</sub>.

**Table S15.** Hydrogen atom coordinates (Å×10<sup>4</sup>) and isotropic displacement parameters (Å<sup>2</sup>×10<sup>3</sup>) for [Ni(Me<sub>2</sub>dpb)Cl]·CH<sub>2</sub>Cl<sub>2</sub>.

**Table S16.** Fractional atomic coordinates (×10<sup>4</sup>) and equivalent isotropic displacement parameters (Å<sup>2</sup>×10<sup>3</sup>) for [Pd(Me<sub>2</sub>dpb)Cl].

**Table S17.** Anisotropic displacement parameters (Å<sup>2</sup>×10<sup>3</sup>) for [Pd(Me<sub>2</sub>dpb)Cl].

**Table S18.** Selected bond lengths for [Pd(Me<sub>2</sub>dpb)Cl].

**Table S19.** Selected bond angles for [Pd(Me<sub>2</sub>dpb)Cl].

**Table S20.** Selected torsion angles for [Pd(Me<sub>2</sub>dpb)Cl].

**Table S21.** Hydrogen atom coordinates (Å×10<sup>4</sup>) and isotropic displacement parameters (Å<sup>2</sup>×10<sup>3</sup>) for [Pd(Me<sub>2</sub>dpb)Cl].

## References

## Syntheses

Overview over the attempted syntheses of [Pd(dpb)Cl] and [Pd(Me<sub>2</sub>dpb)Cl]:

using 1,3-dipyridyl-benzene (dpbH) - comparison of different Pd precursors:

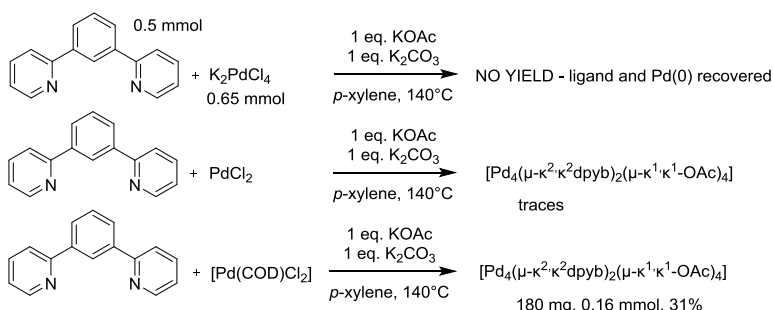

toluene instead of *p*-xylene and lower T:

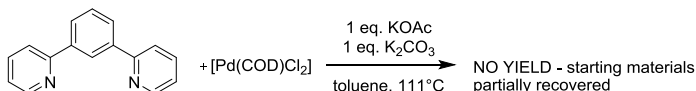

potassium pivalate (KO<sub>2</sub>Piv) instead of KOAc:

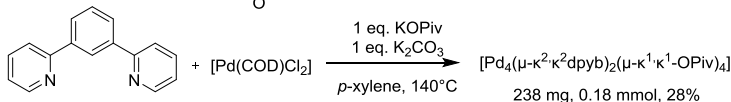

using the dimethyl-substituted ligand (Me<sub>2</sub>dpbH):

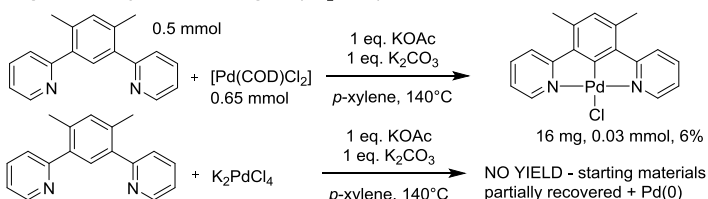

**Scheme S1.** Overview over attempted syntheses of Pd(II) complexes with the dpbH protoligand and the Me<sub>2</sub>dpbH derivative using the base-assisted method.

**Attempted synthesis of [Pd(Me<sub>2</sub>dpb)Cl].** Solutions of 0.3 mmol Me<sub>2</sub>dpbH dissolved in 7.5 mL MeCN and 0.3 mmol K<sub>2</sub>[PdCl<sub>4</sub>] dissolved in 7.5 mL H<sub>2</sub>O were mixed and heated under reflux (~90 °C) for 2 h, as recently described for the synthesis of [Pd(phbpy)Cl] (Hphbpy = 6-phenyl-2,2'-bipyridine [1]. During the reaction, the mixture turned dark.

Filtration gave a light yellow filtrate and a grey-black precipitate. The latter was extracted using CH<sub>2</sub>Cl<sub>2</sub> but no product complex was observed in NMR spectra of the obtained grey material. Instead, we found traces of the ligand Me<sub>2</sub>dpbH.

#### Synthesis of [Pd<sub>4</sub>(μ-κ<sup>2</sup>,κ<sup>2</sup>dpb)<sub>2</sub>(μ-κ<sup>1</sup>,κ<sup>1</sup>-OAc)<sub>4</sub>] using PdCl<sub>2</sub>.

In an inert flask with a water trap filled with molecular sieve (3 Å), 0.233 g PdCl<sub>2</sub> (1.3 mmol, 1.3 eq.), 0.099 g KOAc (1.0 mmol, 1.0 eq.) and 0.140 g K<sub>2</sub>CO<sub>3</sub> (1.0 mmol, 1.0 eq.) were prepared and 0.241 g 1,3-di(2-pyridyl)-benzene (1.0 mmol, 1.0 eq.) and dry *p*-xylene (100 mL) were added and heated under reflux for 72 h. After cooling to ambient temperature, the precipitated black solid was filtered off, washed once with *p*-xylene and the product was extracted using CH<sub>2</sub>Cl<sub>2</sub>. The solvent was removed and the pale orange solid was dissolved in THF and isolated with a yield of 180 mg (0.16 mmol, 31%). <sup>1</sup>H NMR (300 MHz, CD<sub>2</sub>Cl<sub>2</sub>): δ = 7.92 (ddd, *J* = 5.8, 1.6, 0.7 Hz, 4H), 7.41 (td, *J* = 7.8, 1.6 Hz, 4H), 7.12 (d, *J* = 8.3 Hz, 4H), 6.70 (s, 2H), 6.66 (ddd, *J* = 7.2, 5.7, 1.4 Hz, 4H), 6.49 (s, 2H), 2.19 (s, 6H), 2.07 (s, 6H) ppm.

#### Synthesis of [Pd<sub>4</sub>(μ-κ<sup>2</sup>,κ<sup>2</sup>dpb)<sub>2</sub>(μ-κ<sup>1</sup>,κ<sup>1</sup>-OAc)<sub>4</sub>] using [Pd(COD)Cl<sub>2</sub>].

In an inert flask with a water trap filled with molecular sieve (3 Å), 0.233 g [Pd(COD)Cl<sub>2</sub>] (0.60 mmol, 1.3 eq.), 0.052 g KOAc (0.52 mmol, 1.0 eq.) and 0.072 g K<sub>2</sub>CO<sub>3</sub> (0.52 mmol, 1.0 eq.) were prepared and 0.120 g 1,3-di(2-pyridyl)-benzene (0.52 mmol, 1.0 eq.) and dry *p*-xylene (50 mL) were added and heated under reflux for 72 h. After cooling to ambient temperature, the precipitated black solid was filtered off, washed once with *p*-xylene and the product was extracted using CH<sub>2</sub>Cl<sub>2</sub>. The solvent was removed and the pale orange solid was isolated with a yield of 205 mg (0.18 mmol, 35%).

<sup>1</sup>H NMR (300 MHz, CD<sub>2</sub>Cl<sub>2</sub>, signals from [Pd<sub>4</sub>(μ-κ<sup>2</sup>,κ<sup>2</sup>dpb)<sub>2</sub>(μ-κ<sup>1</sup>,κ<sup>1</sup>-OAc)<sub>4</sub>]): δ = 7.91 (dd, *J* = 5.7, 0.9 Hz, 2H), 7.40 (td, *J* = 8.1, 1.7 Hz, 2H), 7.11 (d, *J* = 7.8 Hz, 2H), 6.97 (br s, 2H), 6.65 (ddd, *J* = 7.3, 5.7, 1.4 Hz, 1H), 6.49 (s, 1H), 2.19 (s, 6H), 2.07 (s, 6H) ppm. <sup>1</sup>H NMR (300 MHz, CD<sub>2</sub>Cl<sub>2</sub>, signals from [Pd(PyPhPy)Cl]): δ = 8.95 (d, *J* = 5.4 Hz, 2H), 7.85 (d, *J* = 1.5 Hz, 2H), 7.65 (d, *J* = 8.0 Hz, 2H), 7.25 (m, 4H), 7.15 (m, 2H) ppm. EI-MS(+) *m/z* = 374 [Pd(PyPhPy)Cl]<sup>+</sup> (2%), 337 [Pd(PyPhPy)]<sup>+</sup> (6%), 293 [Pd(PyPh)Cl]<sup>+</sup>, 232 [PyPhPy]<sup>+</sup> (100%), 154 [PyPh]<sup>+</sup> (16%), 78 [Py]<sup>+</sup> (8%).

#### Synthesis of [Pd<sub>4</sub>(μ-κ<sup>2</sup>,κ<sup>2</sup>dpb)<sub>2</sub>(μ-κ<sup>1</sup>,κ<sup>1</sup>-OPiv)<sub>4</sub>] using [Pd(COD)Cl<sub>2</sub>].

In an inert flask with a water trap filled with molecular sieve (3 Å), 0.186 g [Pd(COD)Cl<sub>2</sub>] (0.65 mmol, 1.3 eq.), 0.070 g KOPiv (0.5 mmol, 1.0 eq.) and 0.069 g K<sub>2</sub>CO<sub>3</sub> (0.5 mmol, 1.0 eq.) were prepared and 0.116 g 1,3-di(2-pyridyl)-benzene (0.5 mmol, 1.0 eq.) and dry *p*-xylene (150 mL) were added and heated under reflux for 72 h. After cooling to ambient temperature, the precipitated black solid was filtered off, washed once with *p*-xylene and the product was extracted using CH<sub>2</sub>Cl<sub>2</sub>. The solvent was removed and the pale orange solid was isolated with a yield of 238 mg (0.18 mmol, 28%). <sup>1</sup>H NMR (300 MHz, DMSO-*d*<sub>6</sub>): δ = 7.83 (d, *J* = 4.5 Hz, 4H), 7.72-7.60 (m, 9H), 7.29 (d, *J* = 6.8 Hz, 2H), 7.00-6.90 (m, 4H), 6.39 (s, 2H), 1.22-1.18 (m, 24H), 1.17 (d, *J* = 2.0 Hz, 6H), 1.11 (d, *J* = 1.8 Hz, 6H).

## Photophysical characterisation

Absorption spectra were measured on a Varian Cary 100 double-beam UV-Vis-NIR spectrometer and baseline-corrected.

Steady-state excitation and emission spectra were recorded on a FluoTime300 spectrometer from PicoQuant equipped with a 300 W ozone-free Xe lamp (250-900 nm), a 10 W Xe flash-lamp (250-900 nm, pulse width < 10 μs) with repetition rates of 0.1 to 300 Hz, an excitation monochromator (Czerny-Turner 2.7 nm/mm dispersion, 1200 grooves/mm, blazed at 300 nm), diode lasers (pulse width < 80 ps) operated by a computer-controlled laser driver PDL-820 (repetition rate up to 80 MHz, burst mode for slow and weak decays), two emission monochromators (Czerny-Turner, selectable gratings blazed at 500 nm with 2.7 nm/mm dispersion and 1200 grooves/mm, or blazed at 1250 nm with 5.4 nm/mm dispersion and 600 grooves/mm), Glan-Thompson polarisers for excitation (Xe-lamps) and emission, a Peltier-thermostatised sample holder from Quantum Northwest (−40 °C to 105 °C), and two detectors, a PMA Hybrid 40 (transit time spread FWHM < 120 ps, 300 to 720 nm) and a R5509-42 NIR-photomultiplier tube (transit time spread FWHM 1.5 ns, 300-1400 nm) with external cooling (−80 °C) from Hamamatsu.

Steady-state and fluorescence lifetimes were recorded in TCSPC mode by a PicoHarp 300 (minimum base resolution 4 ps).

Phosphorescence lifetimes were recorded in MCS mode by a TimeHarp 300 (minimum base resolution 250 ps). Emission and excitation spectra were corrected for source intensity (lamp and grating) by standard correction curves.

The solid sample of [Pd(na(tbppy)tz)Cl] at room temperature was measured on a different FluoTime300 spectrometer from PicoQuant, equipment with a front-face module and a 300 W ozone-free Xe lamp (250-900 nm), a 10 W Xe flash-lamp (250-900 nm, pulse width < 10 μs) with repetition rates of 0.1 to 300 Hz, two excitation monochromators (Czerny-Turner 2.7 nm/mm dispersion, 1200 grooves/mm, blazed at 350 nm and 600 g/mm, blazed at 1250 nm), diode lasers (pulse width < 80 ps) operated by a computer-controlled laser driver PDL-820 (repetition rate up to 80 MHz, burst mode for slow and weak decays), two emission monochromators (Czerny-Turner, selectable gratings blazed at 500 nm with 2.7 nm/mm dispersion and 1200 grooves/mm, or blazed at 1250 nm with 5.4 nm/mm dispersion and 600 grooves/mm) with adjustable slit width between 0 mm and 10 mm, Glan-Thompson polarisers for excitation (Xe-lamps) and emission, a Peltier-thermostatised sample holder (−40 °C to 105 °C), and two detectors, namely a PMA Hybrid 40 (transit time

spread FWHM < 120 ps, 200 to 900 nm) and a R5509-42 NIR-photomultiplier tube (transit time spread FWHM 1.5 ns, 300-1400 nm) from Hamamatsu. Signal-to-noise ratio (optical noise) typically better than 29000:1, as measured with double monochromators in the excitation and emission light path.

Steady-state and fluorescence lifetimes were recorded in TCSPC mode by a PicoHarp 300 (minimum base resolution 4 ps) or MSC mode by a Timeharp 300, where up to several ms can be detected.

Lifetime analysis was performed using the commercial FluoFit software. The quality of the fit was assessed by minimizing the reduced chi squared function ( $\chi^2$ ) and visual inspection of the weighted residuals and their autocorrelation.

Luminescence quantum yields (PLQY) were measured with a Hamamatsu Photonics absolute PL quantum yield measurement system (C9920-02) equipped with a L9799-01 CW Xenon light source (150 W), monochromator, C7473 photonic multi-channel analyser, integrating sphere and employing U6039-05 PLQY measurement software (Hamamatsu Photonics, Ltd., Shizuoka, Japan).

All solvents used were of spectrometric grade (Uvasol®).

## Supplementary Figures and Tables

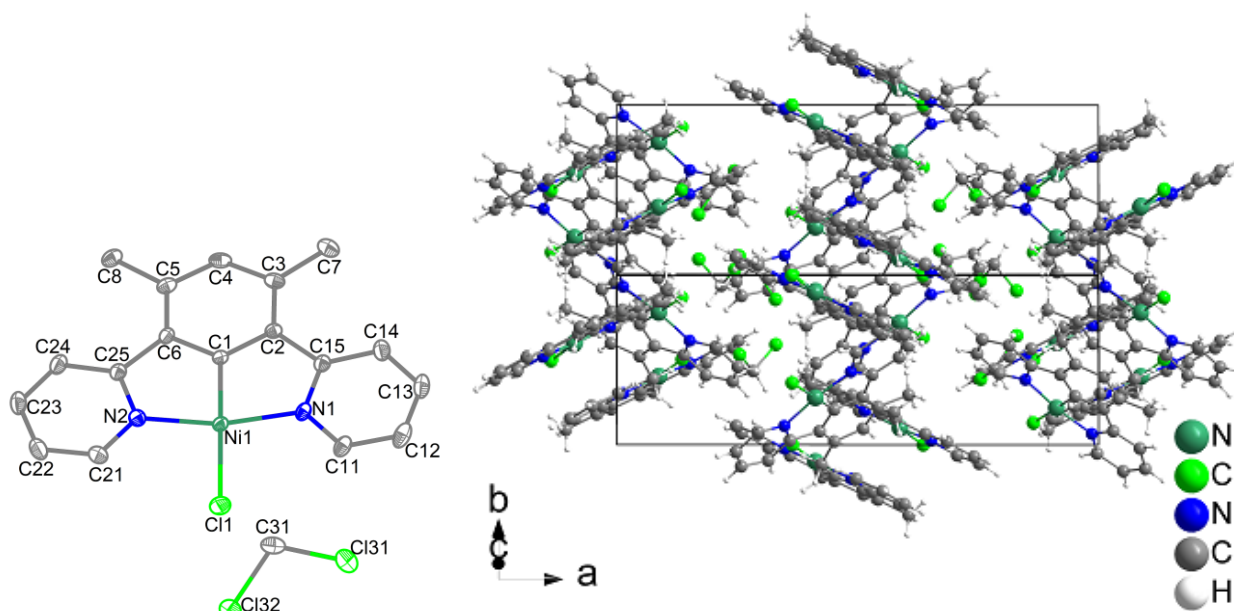

**Figure S1.** Ellipsoid visualisation of the asymmetric unit of  $[\text{Ni}(\text{Me}_2\text{dpb})\text{Cl}]\cdot\text{CH}_2\text{Cl}_2$  at 50% probability. Hydrogen atoms are omitted for clarity (left) and view on the crystal structure along the crystallographic  $b/c$  axis.

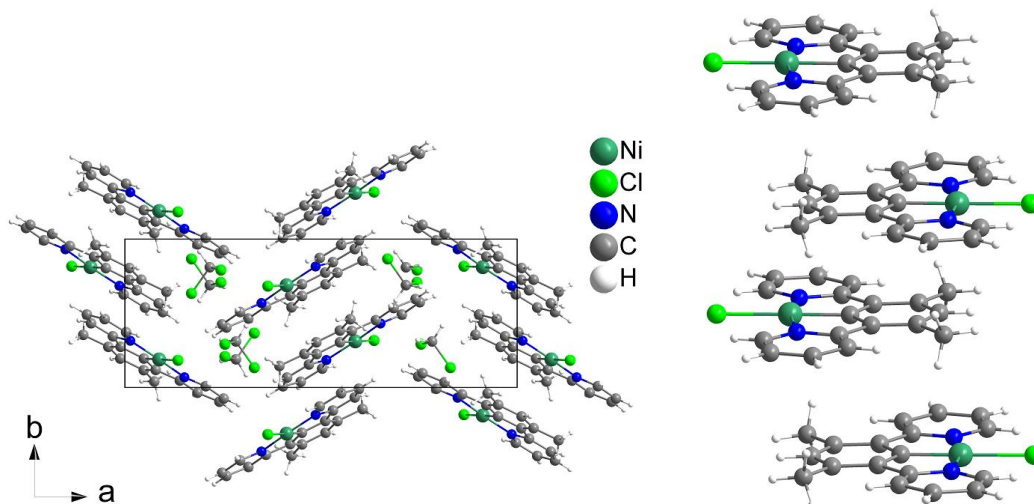

**Figure S2.** View on the crystal structure of  $[\text{Ni}(\text{Me}_2\text{dpb})\text{Cl}]\cdot\text{CH}_2\text{Cl}_2$  along the crystallographic  $c$  axis (left) and close-up of the stacking of the molecules (right).

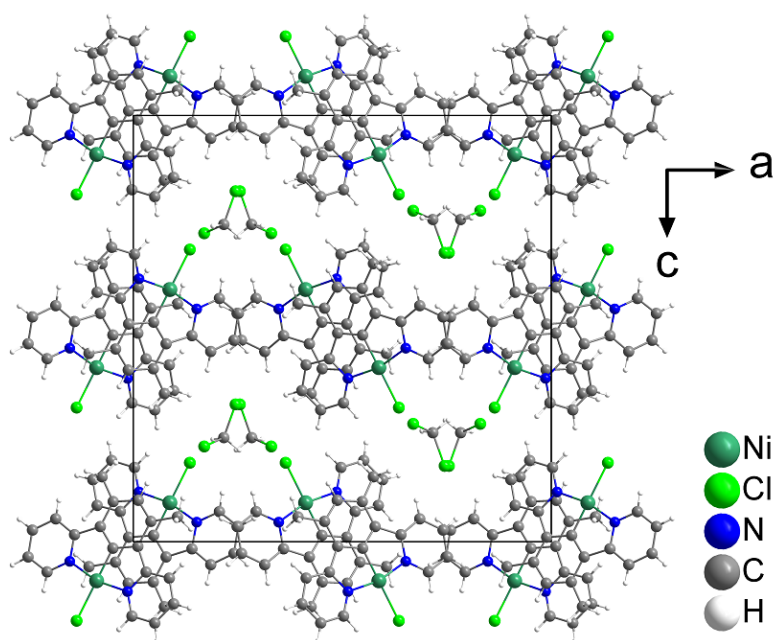

**Figure S3.** View on the crystal structure of  $[\text{Ni}(\text{Me}_2\text{dpb})\text{Cl}]\cdot\text{CH}_2\text{Cl}_2$  along the crystallographic  $b$  axis.

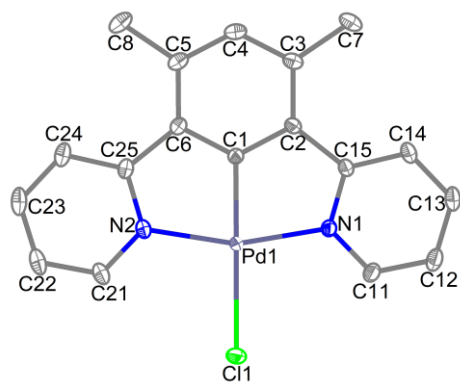

**Figure S4.** Ellipsoid visualisation of the asymmetric unit of  $[\text{Pd}(\text{Me}_2\text{dpb})\text{Cl}]$  at 50% probability. Hydrogen atoms are omitted for clarity.

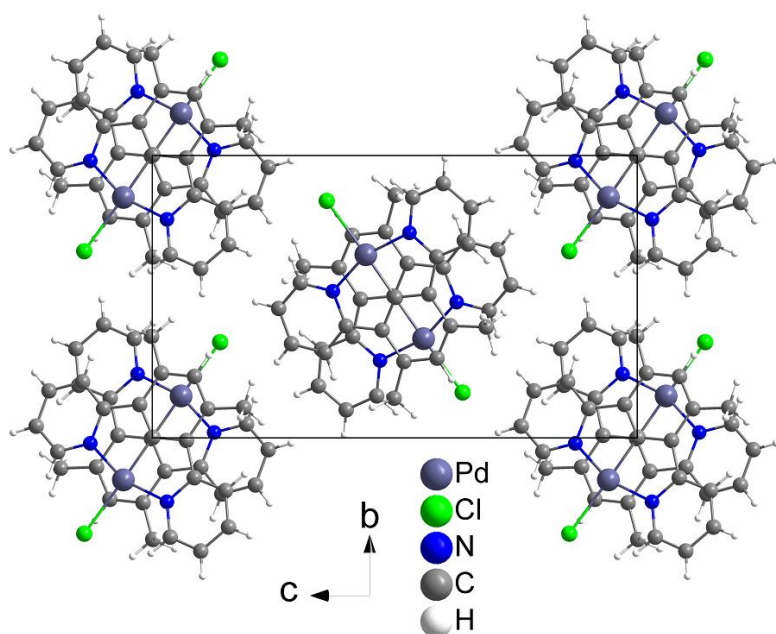

**Figure S5.** View on the crystal structure of  $[\text{Pd}(\text{Me}_2\text{dpb})\text{Cl}]$  along the crystallographic  $a$  axis.

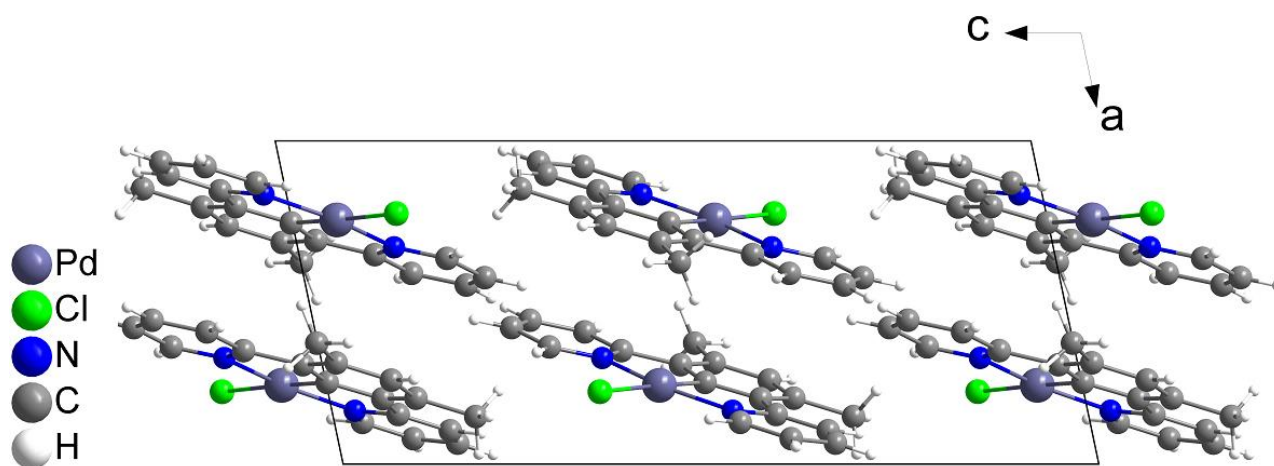

**Figure S6.** View on the crystal structure of  $[\text{Pd}(\text{Me}_2\text{dpb})\text{Cl}]$  along the crystallographic  $b$  axis.

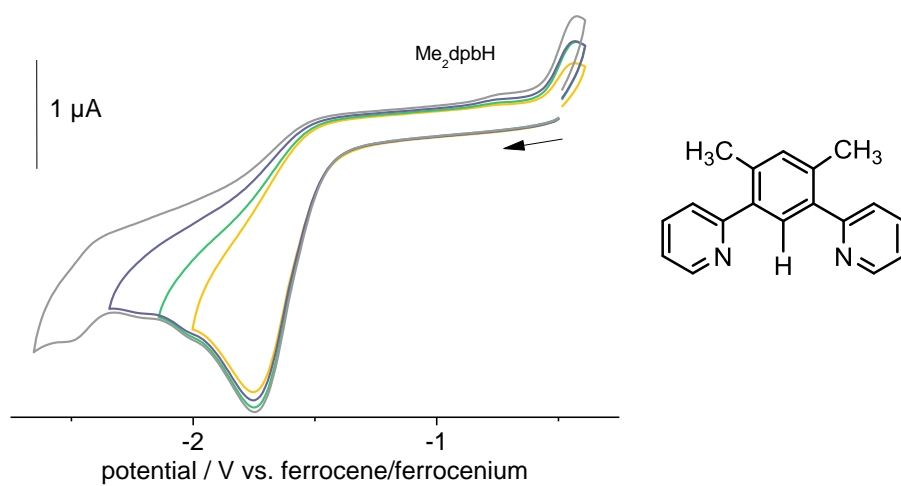

**Figure S7.** Cyclic voltammograms of  $\text{Me}_2\text{dpbH}$  in  $\text{THF}/n\text{-Bu}_4\text{NPF}_6$ .



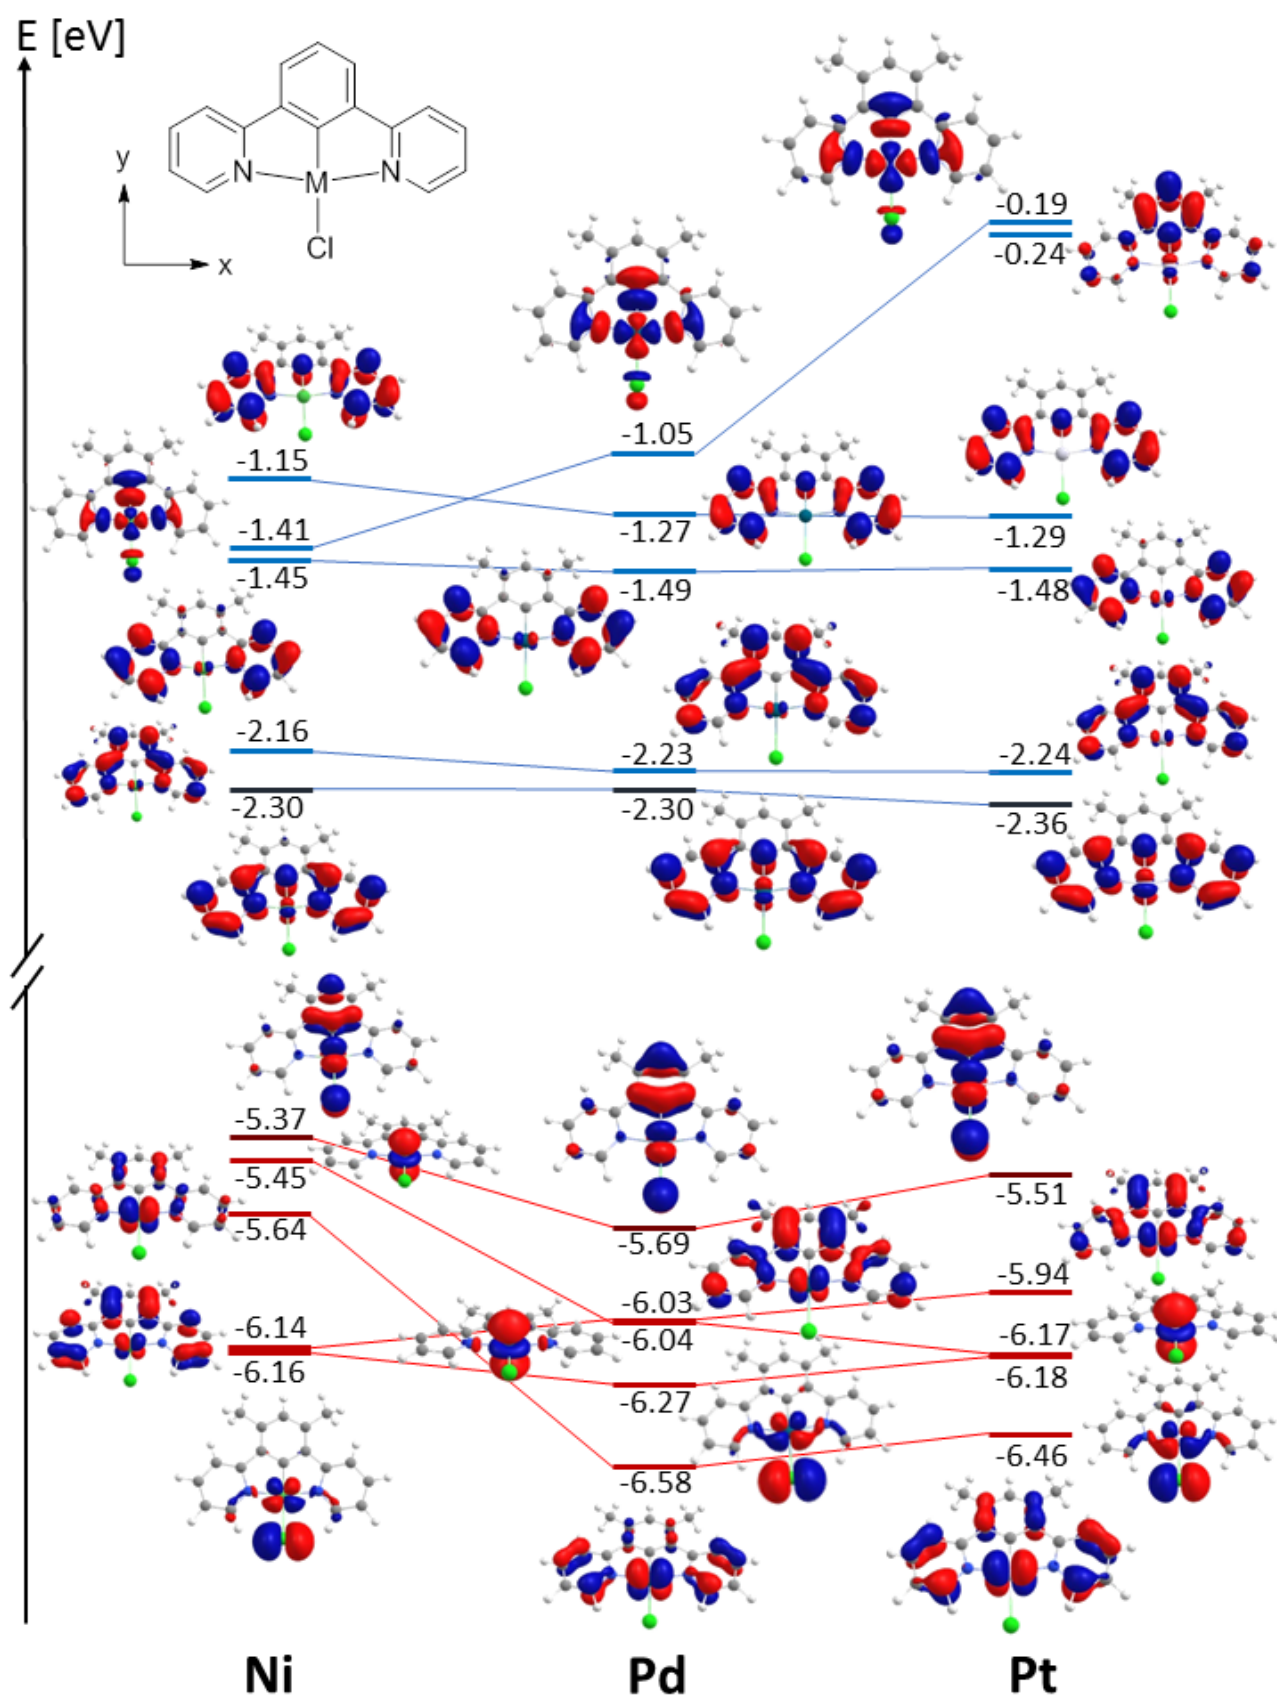

**Figure S8.** Contour plots and energies of selected DFT-calculated molecular orbitals of  $[M(\text{Me}_2\text{dpb})\text{Cl}]$  (M = Ni, Pd, Pt). Calculated at the TPSSh/def2-TZVP level of theory and plotted at an isovalue of 0.04.

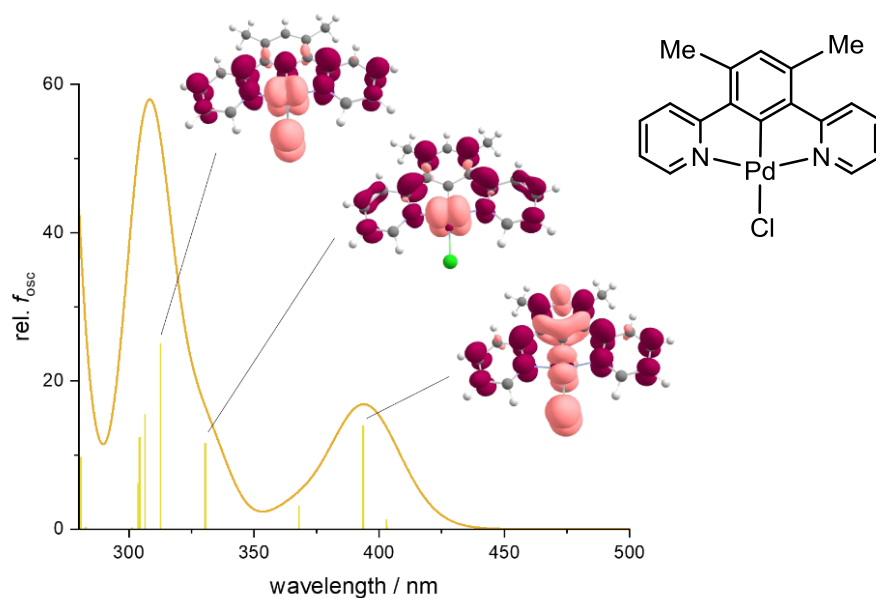

**Figure S9.** TD-DFT-calculated absorption spectrum of  $[\text{Pd}(\text{Me}_2\text{dpb})\text{Cl}]$ . Calculated at the TPSSH/def2-TZVP level of theory.

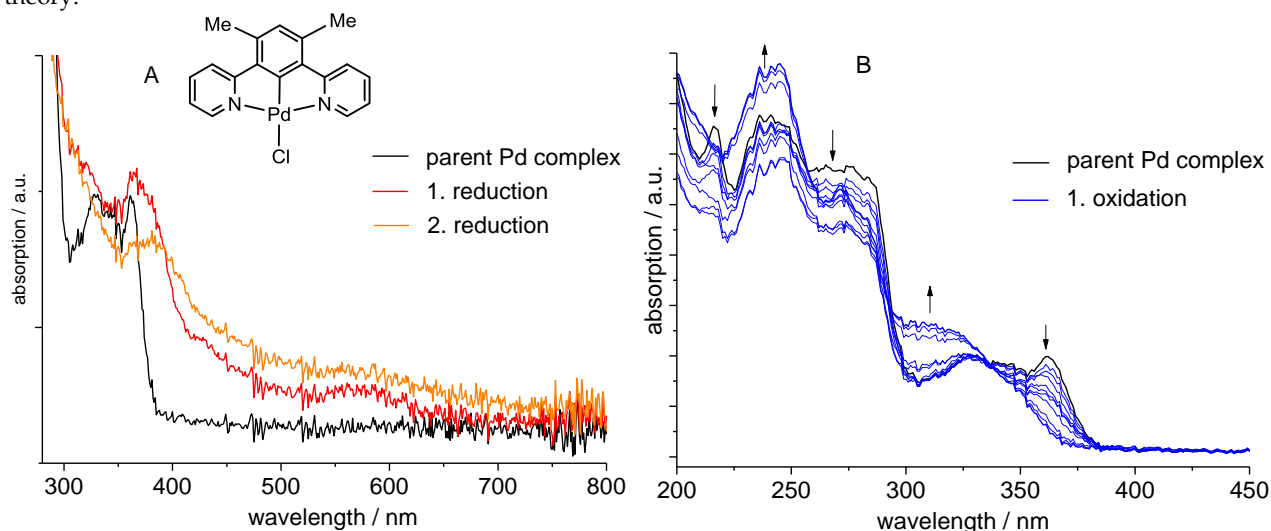

**Figure S10.** UV-vis absorption spectra of  $[\text{Pd}(\text{Me}_2\text{dpb})\text{Cl}]$  in THF/ $n\text{-Bu}_4\text{NPF}_6$  recorded during cathodic reduction (A) and anodic oxidation (B).

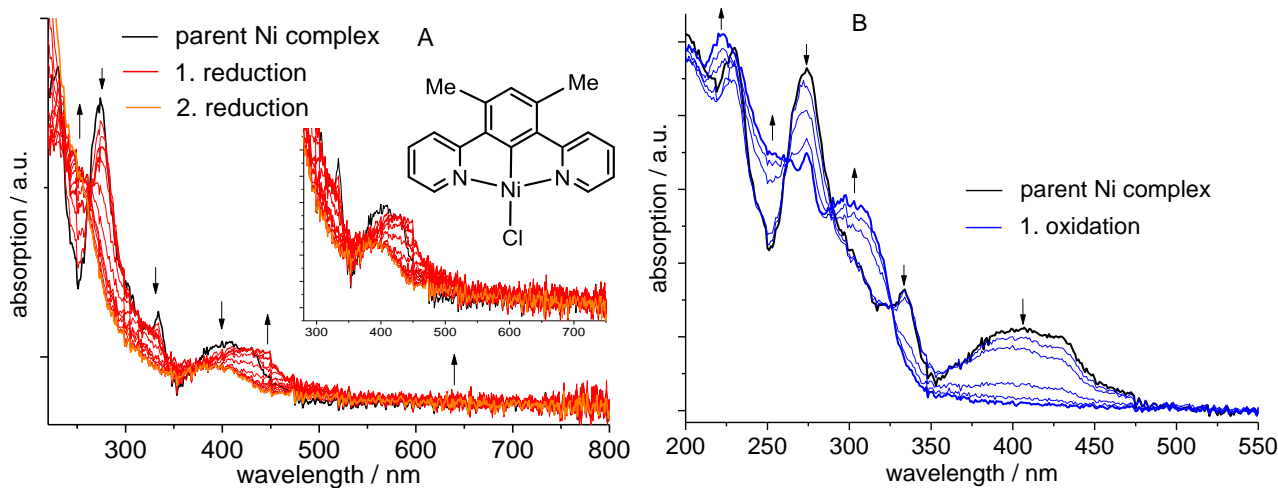

**Figure S11.** UV-vis absorption spectra of  $[\text{Ni}(\text{Me}_2\text{dpb})\text{Cl}]$  in THF/ $n\text{-Bu}_4\text{NPF}_6$  recorded during cathodic reduction (A) and anodic oxidation (B).



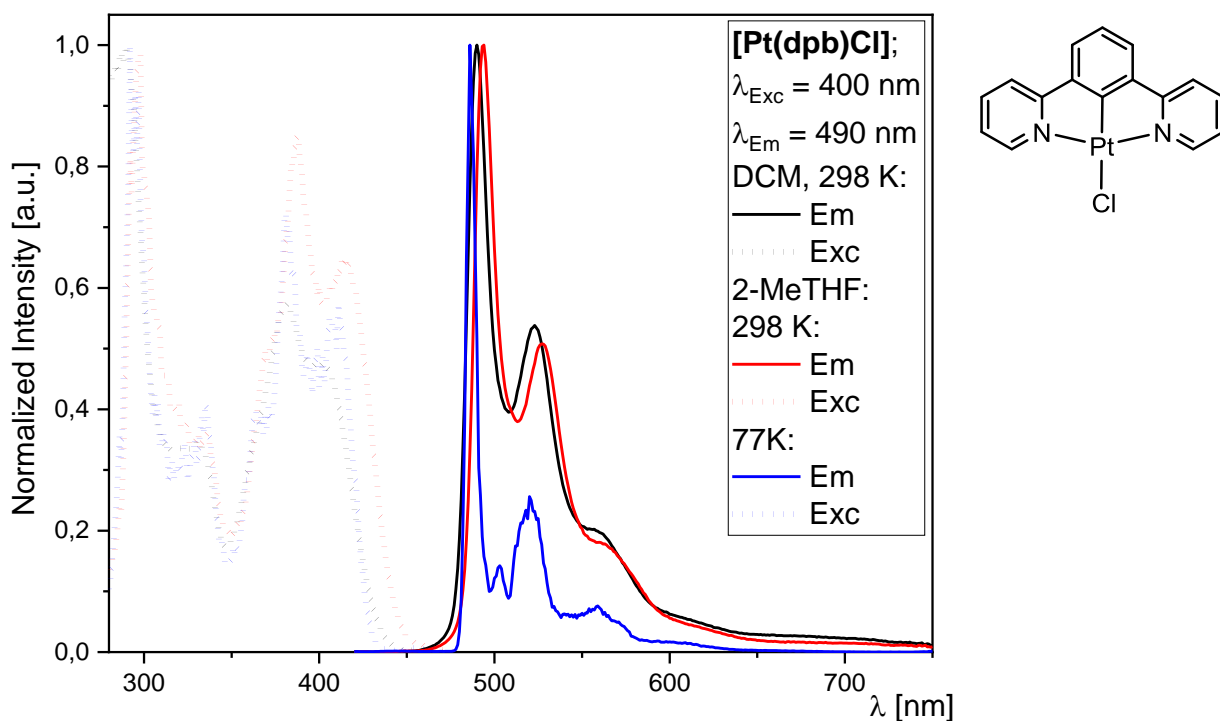

**Figure S12.** Normalised photoluminescence excitation (Exc, dotted line) and emission spectra (Em, solid line) of **[Pt(dpb)Cl]** in DCM (black) and 2-MeTHF (red) at 298 K and in frozen glassy matrices of 2-MeTHF at 77 K (blue). All solutions were optically diluted ( $A < 0.1$ ).

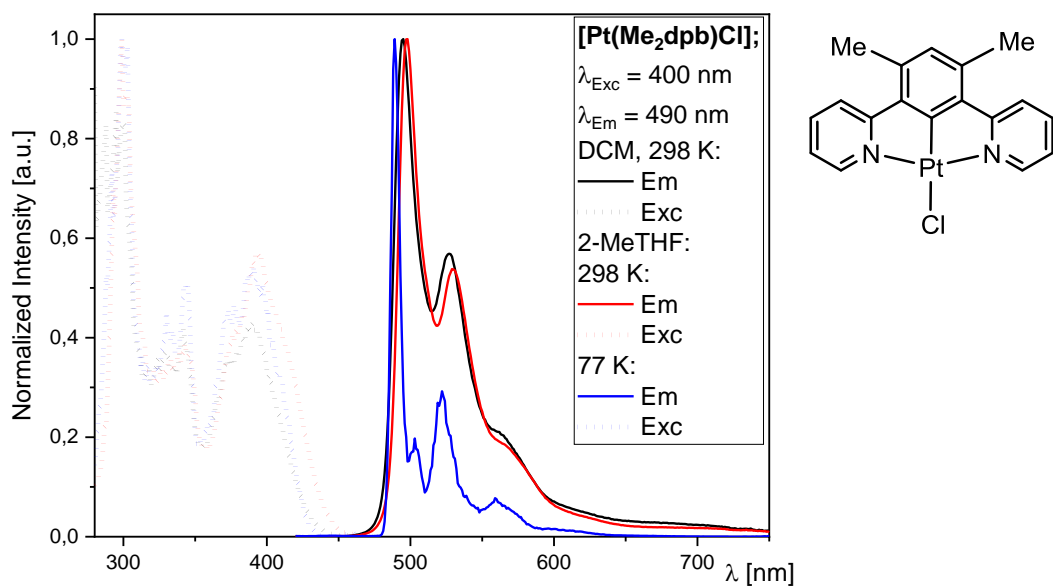

**Figure S13.** Normalised photoluminescence excitation (Exc, dotted line) and emission spectra (Em, solid line) of **[Pt(Me<sub>2</sub>dpb)Cl]** in DCM (black) and 2-MeTHF (red) at 298 K and in frozen glassy matrices of 2-MeTHF at 77 K (blue). All solutions were optically diluted ( $A < 0.1$ ).

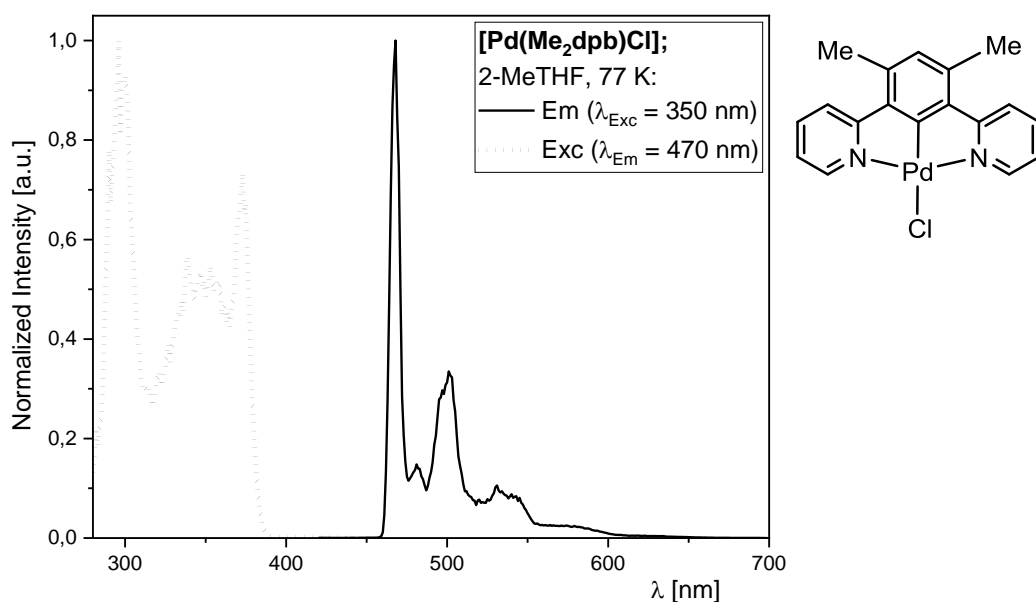

**Figure S14.** Normalised photoluminescence excitation (Exc, dotted line) and emission spectra (Em, solid line) of [Pd(Me<sub>2</sub>dpb)Cl] in frozen glassy matrices of 2-MeTHF at 77 K (black). All solutions were optically diluted ( $A < 0.1$ ).

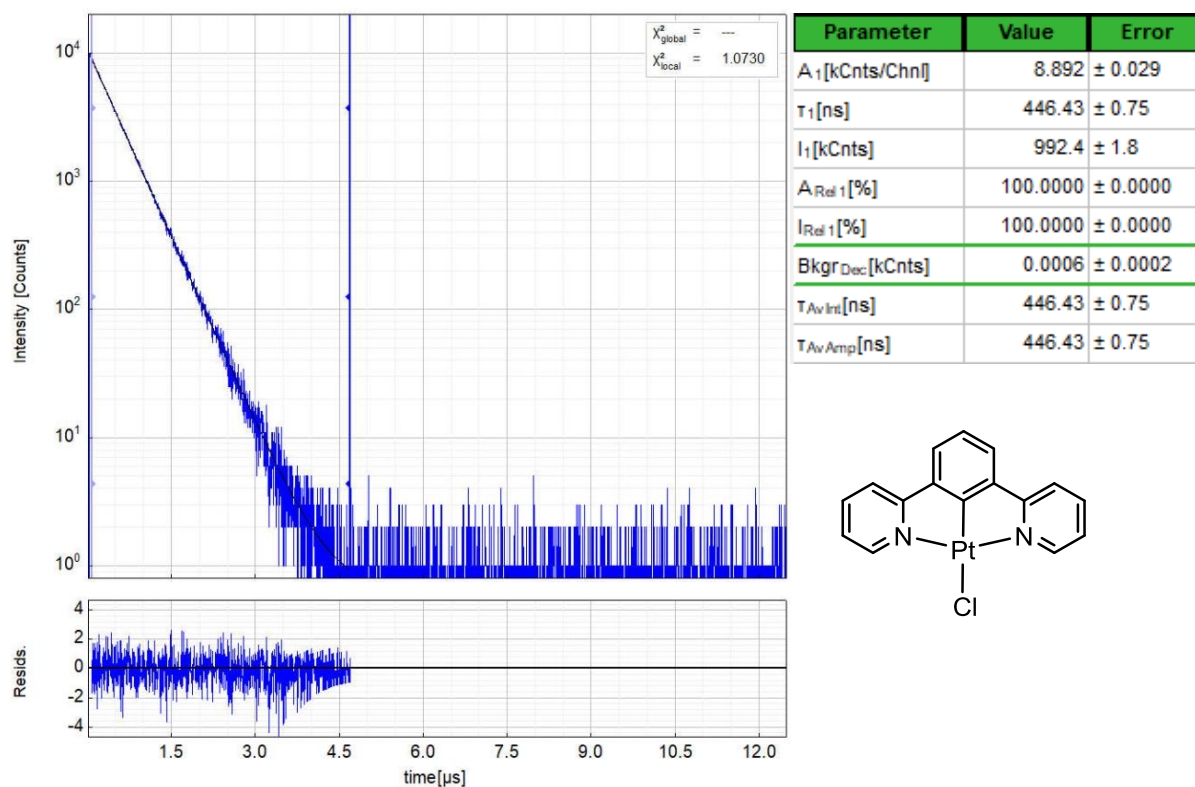

**Figure S15. Left:** Time-resolved photoluminescence decay of [Pt(dpbb)Cl] in air-equilibrated DCM at 298 K, including the residuals ( $\lambda_{\text{exc}} = 376.7 \text{ nm}$ ,  $\lambda_{\text{em}} = 490 \text{ nm}$ ). **Right:** Fitting parameters including pre-exponential factors and confidence limits.

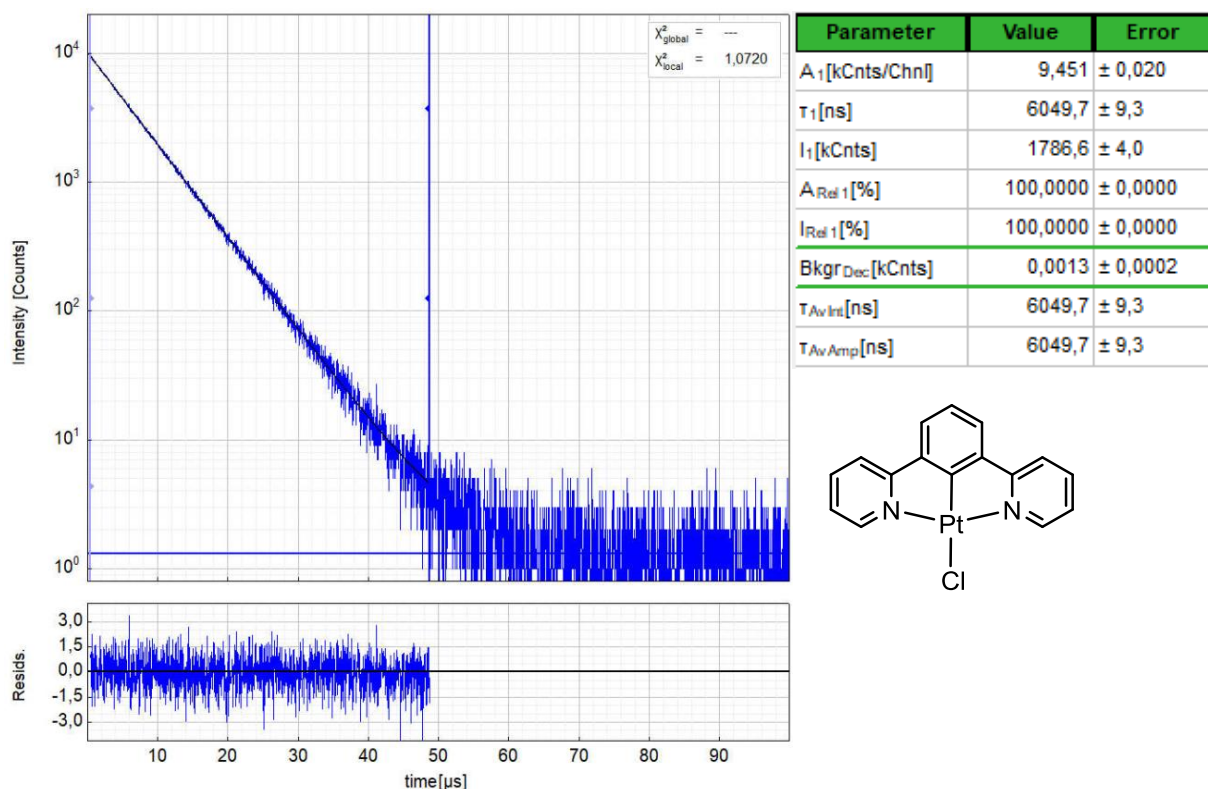

**Figure S16. Left:** Time-resolved photoluminescence decay of **[Pt(dpb)Cl]** in deaerated DCM at 298 K, including the residuals ( $\lambda_{\text{exc}} = 376.7$  nm,  $\lambda_{\text{em}} = 490$  nm). **Right:** Fitting parameters including pre-exponential factors and confidence limits.

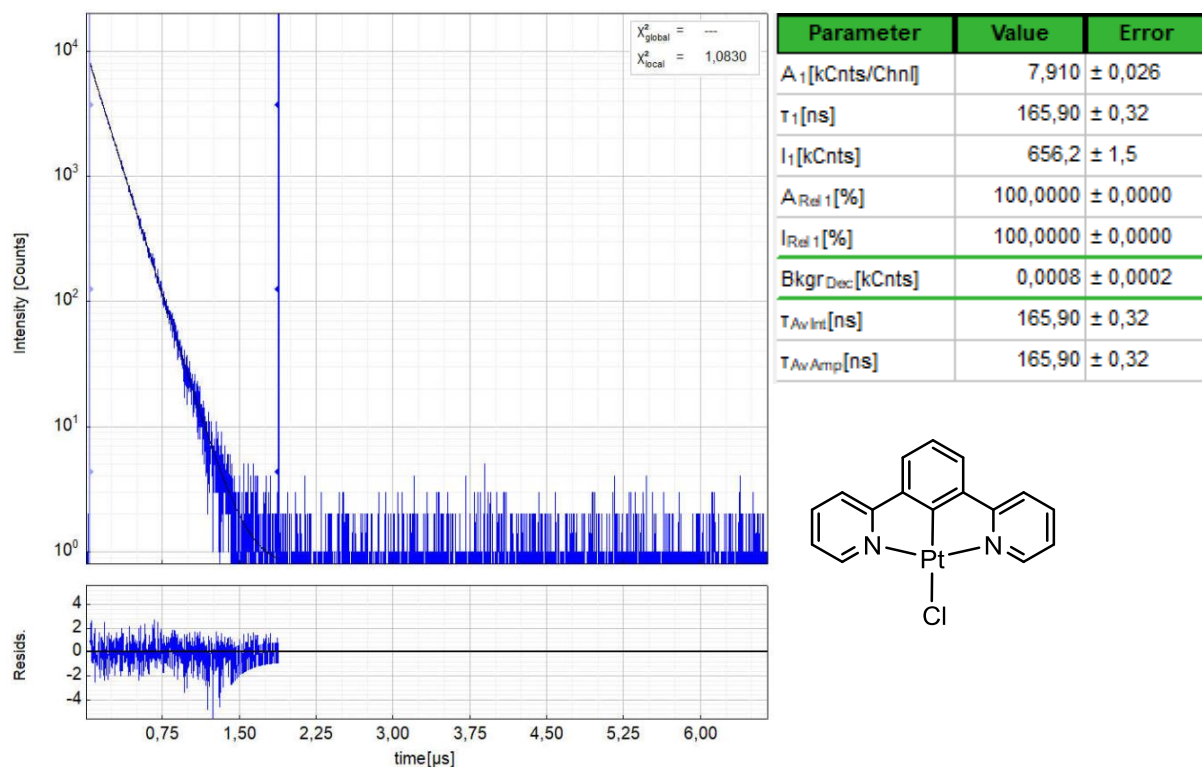

**Figure S17. Left:** Time-resolved photoluminescence decay of **[Pt(dpb)Cl]** in air-equilibrated 2-MeTHF at 298 K, including the residuals ( $\lambda_{\text{exc}} = 376.7$  nm,  $\lambda_{\text{em}} = 490$  nm). **Right:** Fitting parameters including pre-exponential factors and confidence limits.

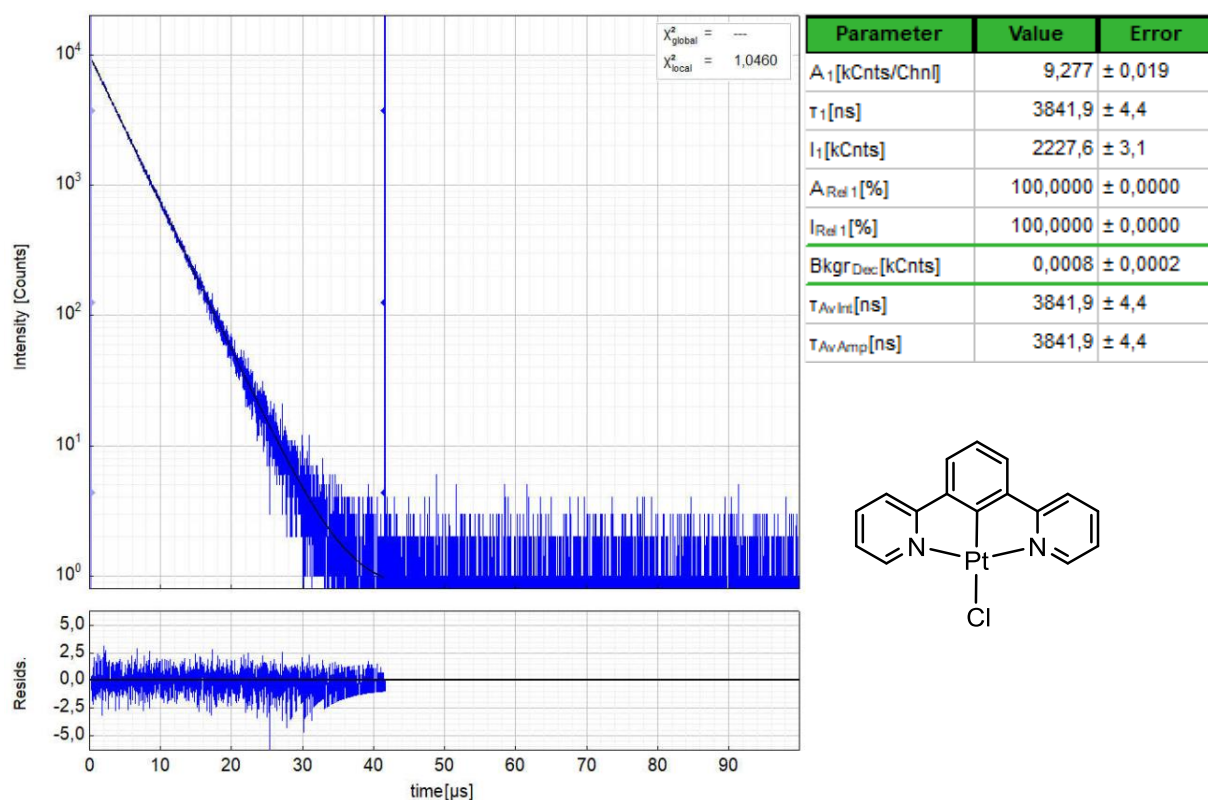

**Figure S18. Left:** Time-resolved photoluminescence decay of **[Pt(dpb)Cl]** in deaerated 2-MeTHF at 298 K, including the residuals ( $\lambda_{exc} = 376.7$  nm,  $\lambda_{em} = 490$  nm). **Right:** Fitting parameters including pre-exponential factors and confidence limits.

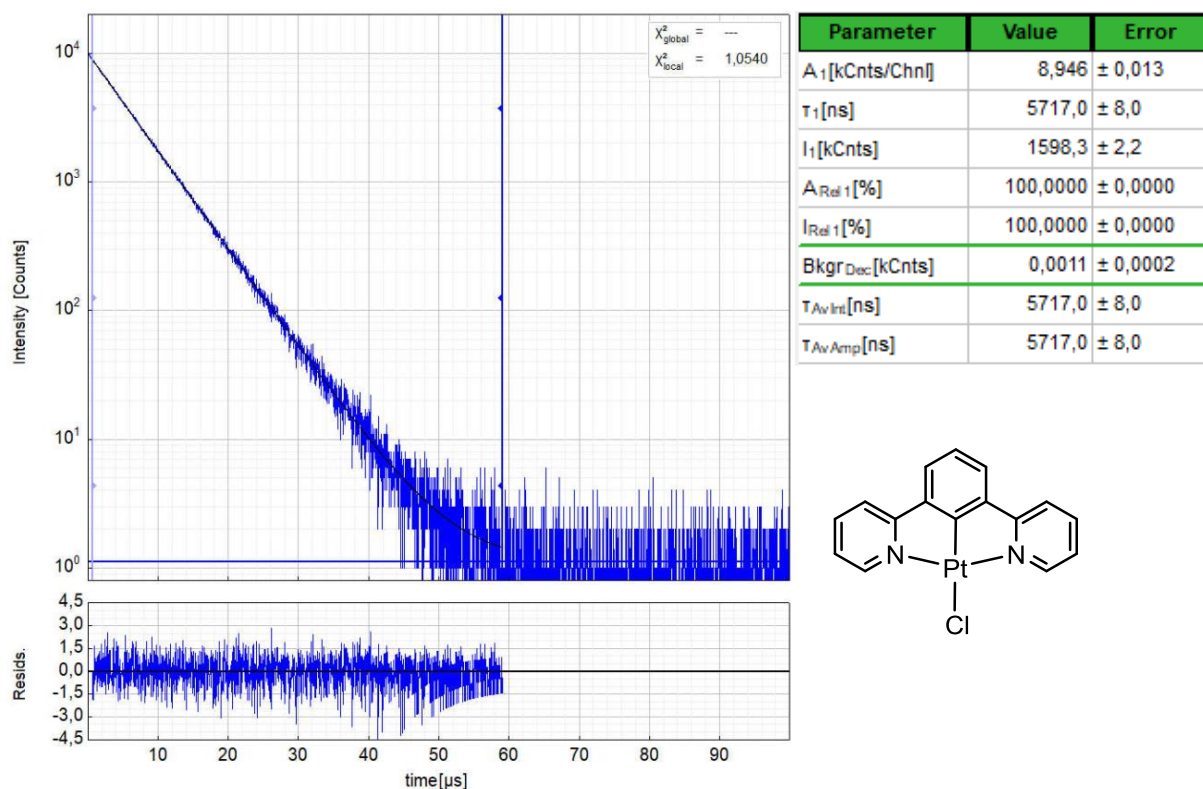

**Figure S19. Left:** Time-resolved photoluminescence decay of **[Pt(dpb)Cl]** in a frozen glassy matrix of 2-MeTHF at 77 K, including the residuals ( $\lambda_{exc} = 376.7$  nm,  $\lambda_{em} = 490$  nm). **Right:** Fitting parameters including pre-exponential factors and confidence limits.

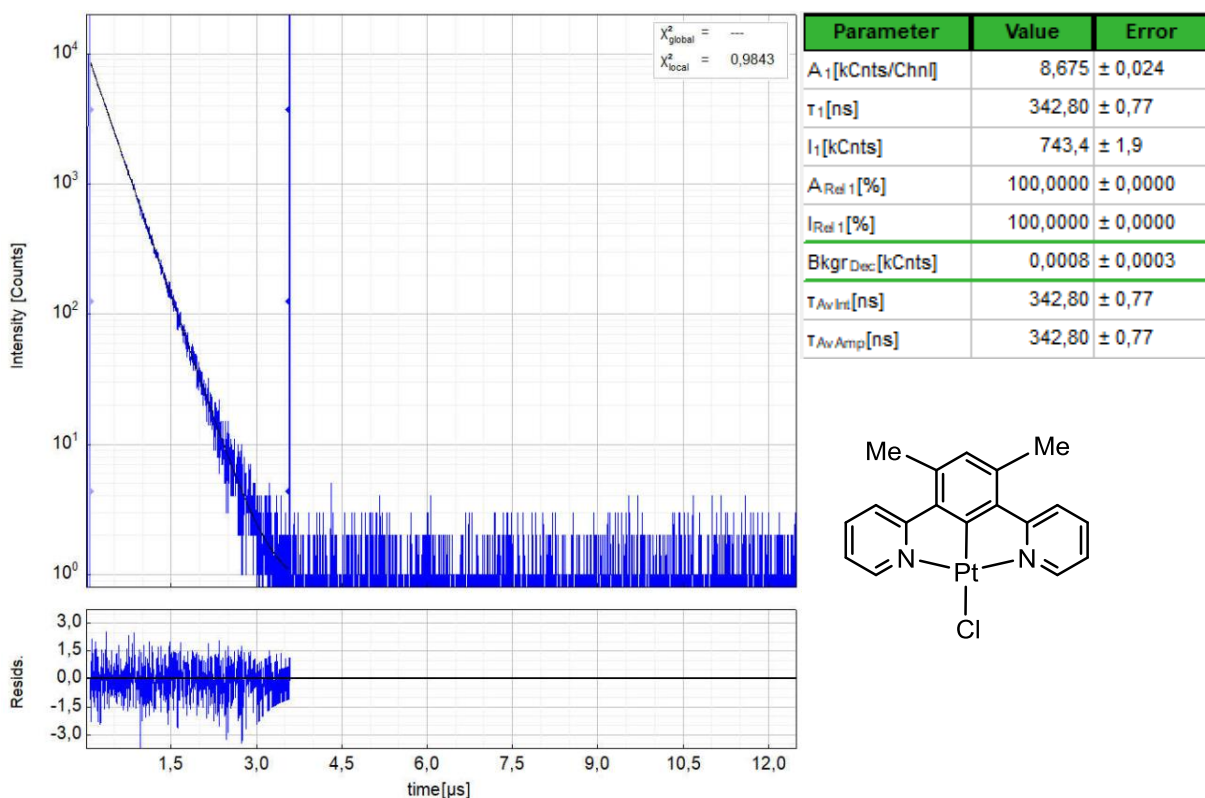

**Figure S20. Left:** Time-resolved photoluminescence decay of  $[\text{Pt}(\text{Me}_2\text{dpb})\text{Cl}]$  in air-equilibrated DCM at 298 K, including the residuals ( $\lambda_{\text{exc}} = 376.7 \text{ nm}$ ,  $\lambda_{\text{em}} = 490 \text{ nm}$ ). **Right:** Fitting parameters including pre-exponential factors and confidence limits.

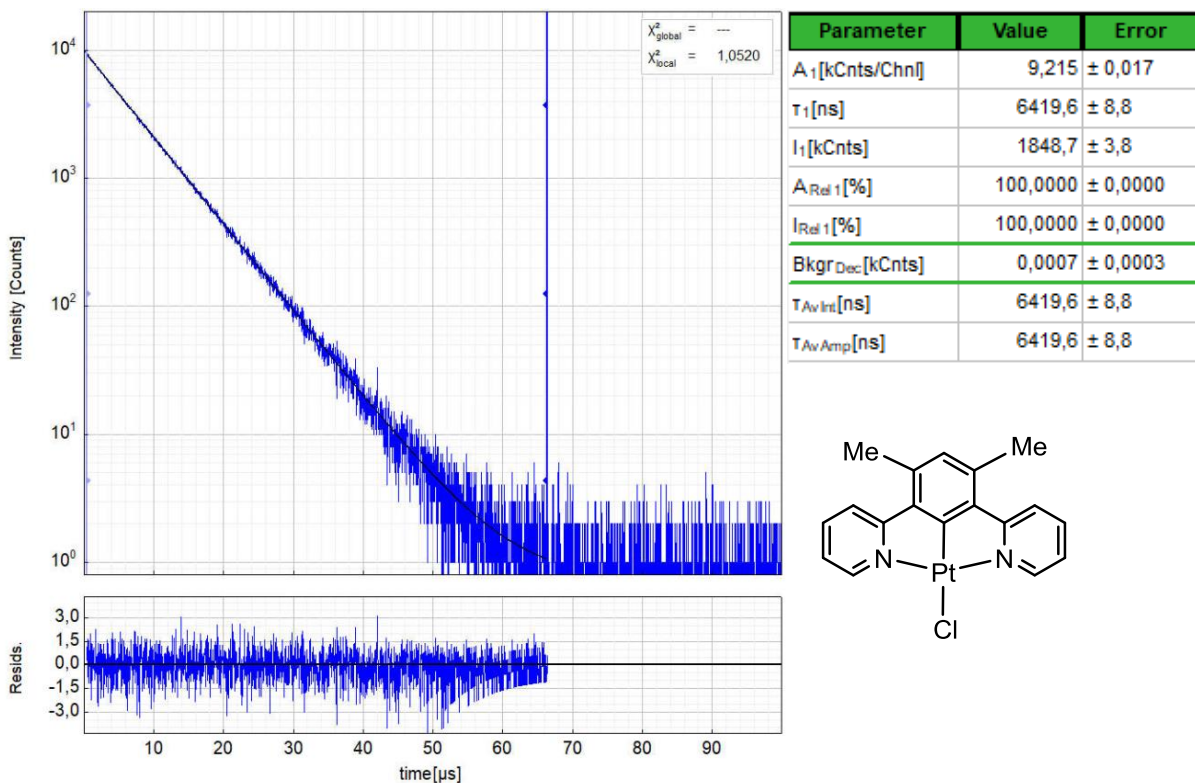

**Figure S21. Left:** Time-resolved photoluminescence decay of  $[\text{Pt}(\text{Me}_2\text{dpb})\text{Cl}]$  in deaerated DCM at 298 K, including the residuals ( $\lambda_{\text{exc}} = 376.7 \text{ nm}$ ,  $\lambda_{\text{em}} = 490 \text{ nm}$ ). **Right:** Fitting parameters including pre-exponential factors and confidence limits.



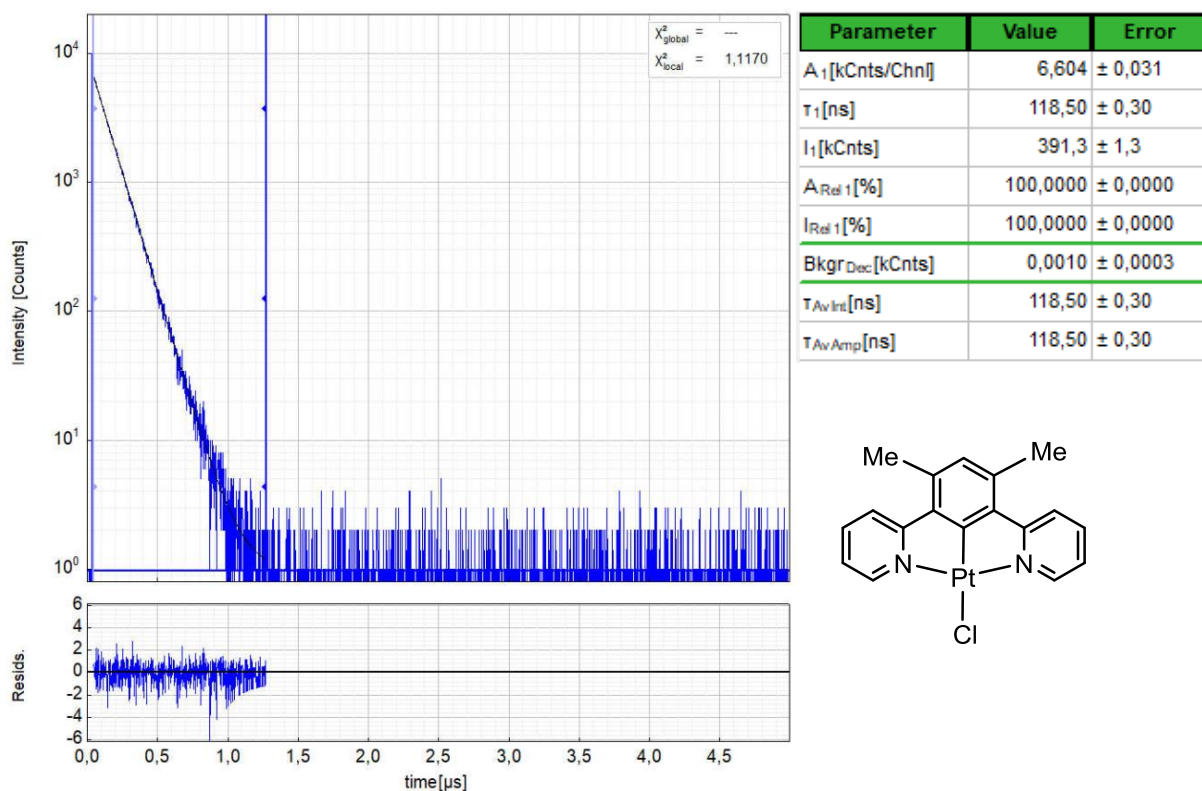

**Figure S22. Left:** Time-resolved photoluminescence decay of  $[\text{Pt}(\text{Me}_2\text{dpb})\text{Cl}]$  in air-equilibrated 2-MeTHF at 298 K, including the residuals ( $\lambda_{\text{exc}} = 376.7 \text{ nm}$ ,  $\lambda_{\text{em}} = 490 \text{ nm}$ ). **Right:** Fitting parameters including pre-exponential factors and confidence limits.

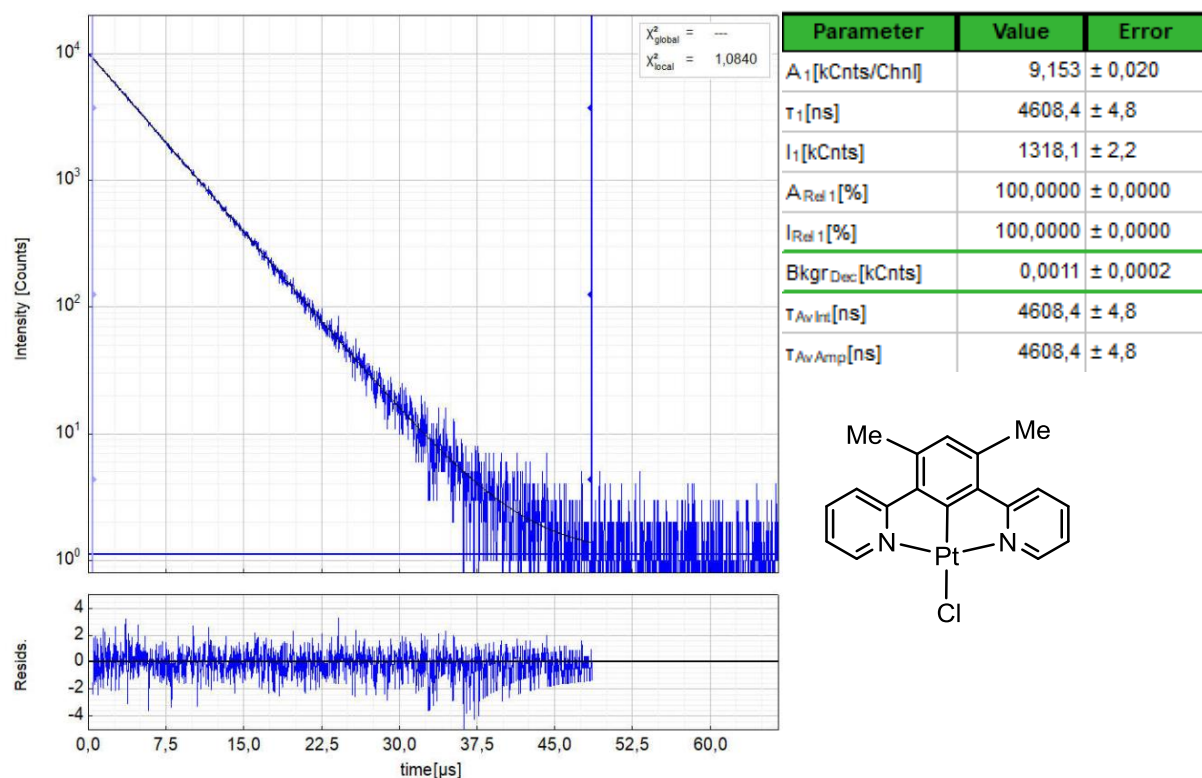

**Figure S23. Left:** Time-resolved photoluminescence decay of  $[\text{Pt}(\text{Me}_2\text{dpb})\text{Cl}]$  in deaerated 2-MeTHF at 298 K, including the residuals ( $\lambda_{\text{exc}} = 376.7 \text{ nm}$ ,  $\lambda_{\text{em}} = 490 \text{ nm}$ ). **Right:** Fitting parameters including pre-exponential factors and confidence limits.



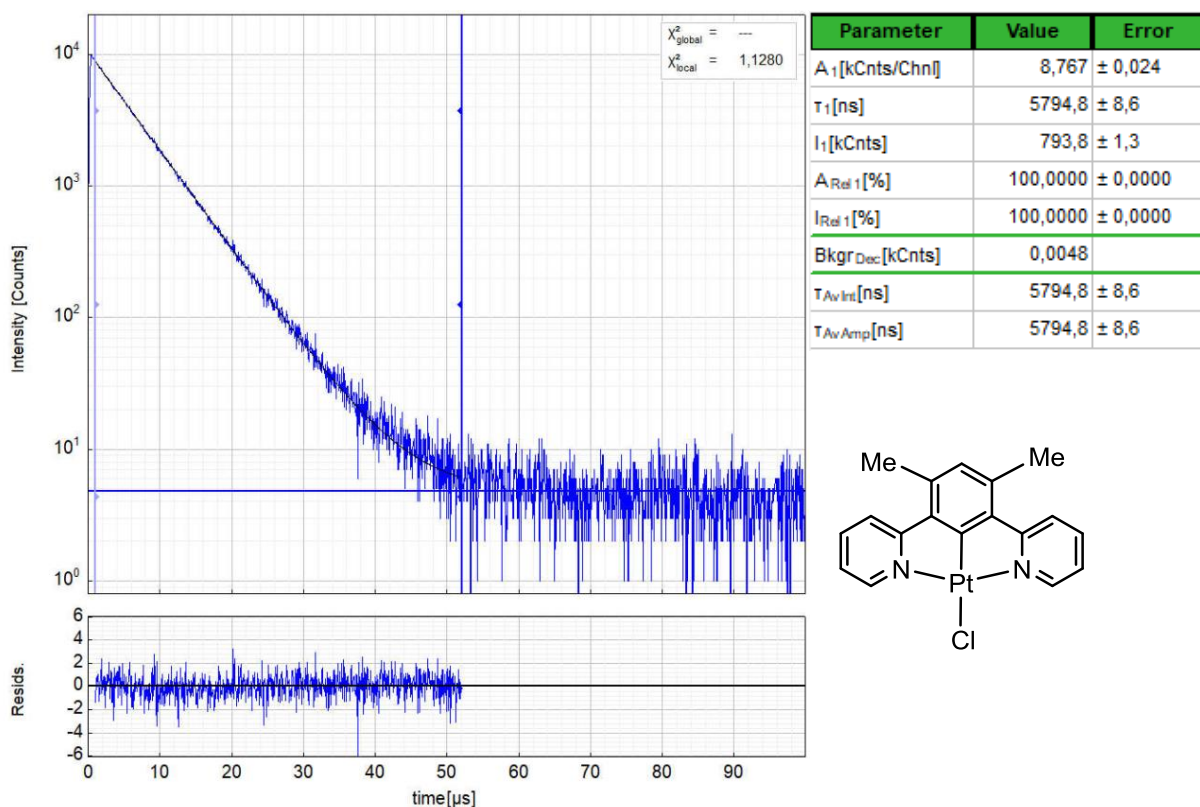

**Figure S24. Left:** Time-resolved photoluminescence decay of [Pt(Me<sub>2</sub>dpb)Cl] in a frozen glassy matrix of 2-MeTHF at 77 K, including the residuals ( $\lambda_{exc} = 376.7$  nm,  $\lambda_{em} = 485$  nm). **Right:** Fitting parameters including pre-exponential factors and confidence limits.

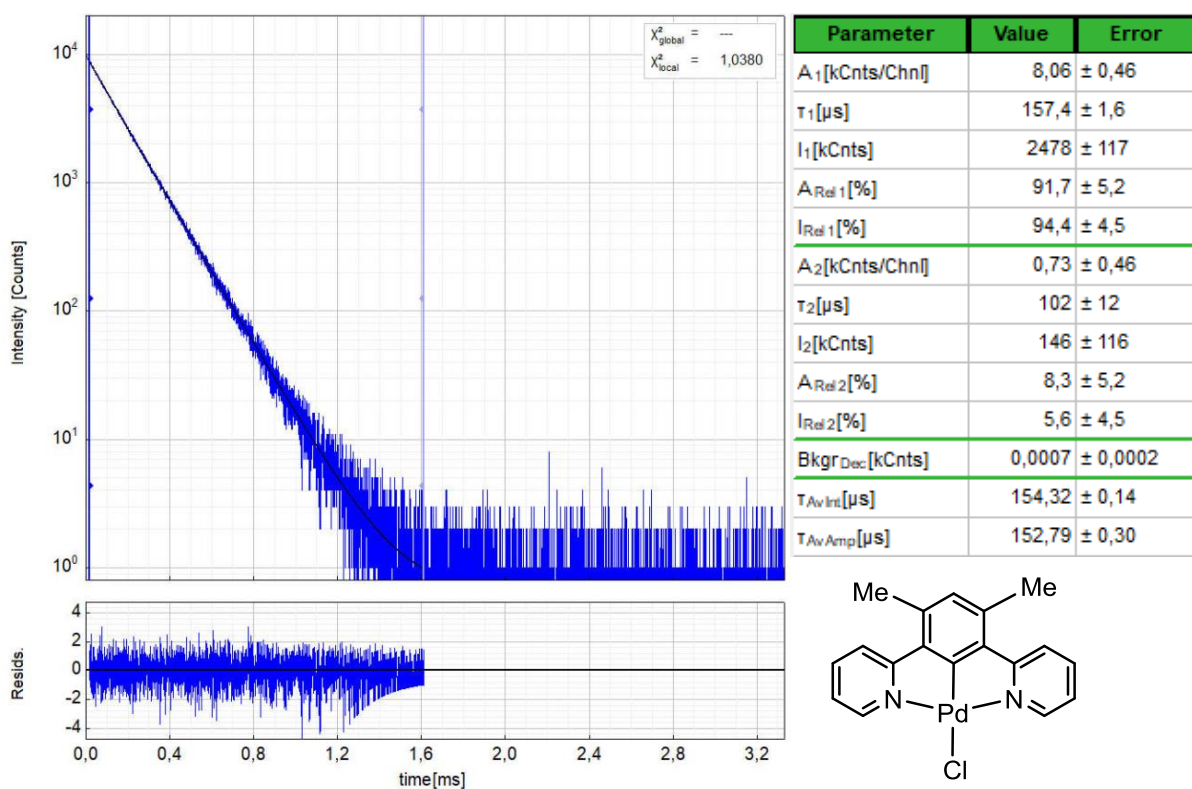

**Figure S25. Left:** Time-resolved photoluminescence decay of [Pd(Me<sub>2</sub>dpb)Cl] in a frozen glassy matrix of 2-MeTHF at 77 K, including the residuals ( $\lambda_{exc} = 376.7$  nm,  $\lambda_{em} = 470$  nm). **Right:** Fitting parameters including pre-exponential factors and confidence limits.

**Table S1.** Crystal data and structure refinement for the [M(Me<sub>2</sub>dpb)Cl] compounds.<sup>a</sup>

|                                                              |                                                                                     |                                                                               |                                                                                                  |
|--------------------------------------------------------------|-------------------------------------------------------------------------------------|-------------------------------------------------------------------------------|--------------------------------------------------------------------------------------------------|
| Empirical formula                                            | C <sub>18</sub> H <sub>15</sub> ClN <sub>2</sub> Ni·CH <sub>2</sub> Cl <sub>2</sub> | C <sub>18</sub> H <sub>15</sub> ClN <sub>2</sub> Pd                           | C <sub>18</sub> H <sub>15</sub> ClN <sub>2</sub> Pt·CH <sub>2</sub> Cl <sub>2</sub> <sup>b</sup> |
| Formula weight                                               | 438.40                                                                              | 401.17                                                                        | 574.78                                                                                           |
| Crystal system                                               | orthorhombic                                                                        | monoclinic                                                                    | triclinic                                                                                        |
| Space group                                                  | <i>Pbca</i>                                                                         | <i>P2<sub>1</sub>/c</i>                                                       | <i>P</i> -1                                                                                      |
| <i>a</i> /Å                                                  | 20.9923(9)                                                                          | 7.9526(4)                                                                     | 6.7959(3)                                                                                        |
| <i>b</i> /Å                                                  | 7.9234(3)                                                                           | 10.3875(6)                                                                    | 16.0696(7)                                                                                       |
| <i>c</i> /Å                                                  | 21.4048(9)                                                                          | 18.2198(10)                                                                   | 16.7798(8)                                                                                       |
| $\alpha$ /°                                                  | 90                                                                                  | 90                                                                            | 89.408(4)                                                                                        |
| $\beta$ /°                                                   | 90                                                                                  | 101.889(2)                                                                    | 87.749(4)                                                                                        |
| $\gamma$ /°                                                  | 90                                                                                  | 90                                                                            | 87.427(4)                                                                                        |
| Volume/Å <sup>3</sup>                                        | 3560.3(3)                                                                           | 1472.81(14)                                                                   | 1829.15(14)                                                                                      |
| <i>Z</i>                                                     | 8                                                                                   | 4                                                                             | 4                                                                                                |
| $\rho_{\text{calc}}$ g/cm <sup>3</sup>                       | 1.636                                                                               | 1.809                                                                         | 2.096                                                                                            |
| $\mu$ /mm <sup>-1</sup>                                      | 1.544                                                                               | 1.438                                                                         | 8.146                                                                                            |
| <i>F</i> (000)                                               | 1792.0                                                                              | 800.0                                                                         | 1096.0                                                                                           |
| Crystal size/mm <sup>3</sup>                                 | 0.07 × 0.07 × 0.01                                                                  | 0.409 × 0.194 × 0.164                                                         | 0.045 × 0.042 × 0.034                                                                            |
| 2 $\Theta$ range for data collection/°                       | 3.806 to 78.912                                                                     | 5.234 to 84.208                                                               | 5.62 to 55.58                                                                                    |
| Index ranges                                                 | −37 ≤ <i>h</i> ≤ 37, −8 ≤ <i>k</i> ≤ 14, −38 ≤ <i>l</i> ≤ 38                        | −15 ≤ <i>h</i> ≤ 14, −19 ≤ <i>k</i> ≤ 19, −34 ≤ <i>l</i> ≤ 34                 | −8 ≤ <i>h</i> ≤ 8, −20 ≤ <i>k</i> ≤ 21, 0 ≤ <i>l</i> ≤ 21                                        |
| Reflections collected                                        | 163303                                                                              | 115130                                                                        | 7929                                                                                             |
| Independent reflections                                      | 10641 [ <i>R</i> <sub>int</sub> = 0.2423, <i>R</i> <sub>sigma</sub> = 0.1213]       | 10323 [ <i>R</i> <sub>int</sub> = 0.0216, <i>R</i> <sub>sigma</sub> = 0.0108] | 7929 [ <i>R</i> <sub>int</sub> = 0.0450, <i>R</i> <sub>sigma</sub> = 0.0310]                     |
| Data/restraints/parameters                                   | 10641/0/229                                                                         | 10323/0/202                                                                   | 7929/0/456                                                                                       |
| Goodness-of-fit on <i>F</i> <sup>2</sup>                     | 1.039                                                                               | 1.109                                                                         | 1.041                                                                                            |
| Final <i>R</i> indexes [ <i>I</i> ≥ 2 $\sigma$ ( <i>I</i> )] | <i>R</i> <sub>1</sub> = 0.0876, <i>wR</i> <sub>2</sub> = 0.1316                     | <i>R</i> <sub>1</sub> = 0.0142, <i>wR</i> <sub>2</sub> = 0.0395               | <i>R</i> <sub>1</sub> = 0.0227, <i>wR</i> <sub>2</sub> = 0.0515                                  |
| Final <i>R</i> indexes [all data]                            | <i>R</i> <sub>1</sub> = 0.1794, <i>wR</i> <sub>2</sub> = 0.1616                     | <i>R</i> <sub>1</sub> = 0.0145, <i>wR</i> <sub>2</sub> = 0.0397               | <i>R</i> <sub>1</sub> = 0.0264, <i>wR</i> <sub>2</sub> = 0.0527                                  |
| Largest diff. peak/hole / e Å <sup>-3</sup>                  | 1.19/−1.30                                                                          | 0.65/−0.72                                                                    | 1.18/−0.93                                                                                       |
| CCDC                                                         | 2093819                                                                             | 2095954                                                                       | 1448097                                                                                          |

<sup>a</sup> From X-ray diffraction on single crystals. Measured using MoK $\alpha$  ( $\lambda$  = 0.71073) radiation at 100.0(2) K. <sup>b</sup> Data from Ref. [2].

**Table S2.** Selected DFT-optimised geometrical data of the complex [Ni(Me<sub>2</sub>dpb)Cl] compared with experimental data from the crystal structure of [Ni(Me<sub>2</sub>dpb)Cl]·CH<sub>2</sub>Cl<sub>2</sub>.<sup>a</sup>

| distances / Å   | calc.         | exp.                | angles / °                      | calc.   | exp.              |
|-----------------|---------------|---------------------|---------------------------------|---------|-------------------|
| Ni–N            | 1.921 / 1.922 | 1.920(2) / 1.921(2) | N–Ni–N                          | 165.5   | 165.5(1)          |
| Ni–C1           | 1.830         | 1.830(3)            | N–Ni–C1                         | 82.7    | 82.9(1) / 82.7(1) |
| Ni–Cl           | 2.258         | 2.2457(8)           | C1–Ni–Cl                        | 180.0   | 179.6(1)          |
| N1–C15 / N2–C25 | 1.383         | 1.368(4) / 1.373(4) | dihedral py/ph                  | 0.1/0.2 | 0.8(1) / 2.7(1)   |
| C2–C15 / C6–C25 | 1.460         | 1.467(4) / 1.473(4) | $\Sigma$ around Ni <sup>b</sup> | 359.9   | 360.0(1)          |

<sup>a</sup> From DFT (BP86/def2-TZVP) calculated geometries. <sup>b</sup> Sum of angles around the metal.

**Table S3.** Selected DFT-optimised geometrical data of the complex [Pd(Me<sub>2</sub>dpb)Cl] compared with experimental data from the crystal structure of [Pd(Me<sub>2</sub>dpb)Cl].<sup>a</sup>

| distances / Å   | calc.         | exp.                  | angles / °                      | calc.     | exp.                    |
|-----------------|---------------|-----------------------|---------------------------------|-----------|-------------------------|
| Pd–N            | 2.037 / 2.038 | 2.0348(7) / 2.0355(6) | N–Pd–N                          | 162.0     | 161.304(25)             |
| Pd–C1           | 1.919         | 1.9157(6)             | N–Pd–C1                         | 81.0      | 80.724(23) / 80.591(24) |
| Pd–Cl           | 2.427         | 2.4512(4)             | C1–Pd–Cl                        | 180.0     | 178.271(21)             |
| N1–C15 / N2–C25 | 1.382         | 1.3710(8) / 1.3711(7) | dihedral py/ph                  | 0.1 / 0.2 | 1.046(28) / 2.720(34)   |
| C2–C15 / C6–C25 | 1.468         | 1.4712(8) / 1.4726(8) | $\Sigma$ around Pd <sup>b</sup> | 360.0     | 360.01                  |

<sup>a</sup> From DFT (BP86/def2-TZVP) calculated geometries. <sup>b</sup> Sum of angles around the metal.

**Table S4.** Selected DFT-optimised geometrical data of the complex [Pt(Me<sub>2</sub>dpb)Cl] compared with experimental data from the crystal structure of [Pt(Me<sub>2</sub>dpb)Cl]·CH<sub>2</sub>Cl<sub>2</sub>.<sup>a</sup>

| distances / Å   | calc. | exp. <sup>b</sup>                          | angles / °               | calc. | exp.                                   |
|-----------------|-------|--------------------------------------------|--------------------------|-------|----------------------------------------|
| Pt–N            | 2.029 | 2.026(4) / 2.022(4)<br>2.018(3) / 2.025(3) | N–Pt–N                   | 162.7 | 162.3(1) / 162.5(1)                    |
| Pt–C1           | 1.922 | 1.915(4) / 1.917(5)                        | N–Pt–C1                  | 81.3  | 80.9(2) / 81.4(2)<br>81.3(2) / 81.2(2) |
| Pt–Cl           | 2.439 | 2.419(1) / 2.420(1)                        | C1–Pt–Cl                 | 179.9 | 178.7(1) / 179.0(1)                    |
| N1–C15 / N2–C25 | 1.389 | 1.382(6) / 1.369(6)<br>1.377(5) / 1.383(6) | dihedral py/ph           | 0.1   | 1.3(1) / 2.5(1)<br>2.6(1) / 3.8(2)     |
| C2–C15 / C6–C25 | 1.468 | 1.475(7) / 1.475(7)<br>1.473(7) / 1.482(7) | Σ around Pt <sup>c</sup> | 360.0 | 360.0(1) / 360.0(1)                    |

<sup>a</sup> From DFT (BP86/def2-TZVP) calculated geometries. <sup>b</sup> Data from Ref. [2], two independent molecules in the unit cell. <sup>c</sup> Sum of angles around the metal.

**Table S5.** Selected absorption maxima for Me<sub>2</sub>dpbH and the complexes [M(Me<sub>2</sub>dpb)Cl] (M = Ni, Pd, Pt)<sup>a</sup>.

| λ / nm (ε / L·mol <sup>-1</sup> ·cm <sup>-1</sup> ) <sup>b</sup> | Me <sub>2</sub> dpbH | [Ni(Me <sub>2</sub> dpb)Cl] | [Pd(Me <sub>2</sub> dpb)Cl] | [Pt(Me <sub>2</sub> dpb)Cl] |
|------------------------------------------------------------------|----------------------|-----------------------------|-----------------------------|-----------------------------|
| λ <sub>1</sub>                                                   | 230 (26600)          | 230 (36300)                 | 217 (27300)                 | 230 (37200)                 |
| λ <sub>2</sub>                                                   | 262 (17400)          | 274 (31000)                 | 239 (25400)                 | 259 (27800)                 |
| λ <sub>3</sub>                                                   | -                    | 307 (11400)                 | 266 (19600)                 | 289 (21000)                 |
| λ <sub>4</sub>                                                   | -                    | 333 (8600)                  | 329 (6300)                  | 333 (6900)                  |
| λ <sub>5</sub>                                                   | -                    | 406 (6200)                  | 344 (5800)                  | 364 (6200)                  |
| λ <sub>6</sub>                                                   | -                    | 430 (5800)                  | 364 (6800)                  | 382 (8600)                  |

<sup>a</sup> Measured in THF at 298 K. <sup>b</sup> Absorption maxima λ<sub>1</sub> / nm, extinction coefficient ε / L·mol<sup>-1</sup>·cm<sup>-1</sup>.

**Table S6.** Selected TD-DFT calculated vertical S<sub>0</sub>→S<sub>n</sub> transitions for [Pt(Me<sub>2</sub>dpb)Cl].<sup>a</sup>

| n  | λ / nm | f <sub>osc</sub> | participating MOs (contribution)              |
|----|--------|------------------|-----------------------------------------------|
| 1  | 435.4  | 0.00199          | HOMO→LUMO (95%)                               |
| 2  | 420.5  | 0.08224          | HOMO→L+1 (92%)                                |
| 8  | 349.0  | 0.03999          | H-4→L+1 (21%), H-1→L+1 (61%), HOMO→L+3 (10%)  |
| 10 | 316.9  | 0.18427          | H-4→LUMO (75%), H-1→L+4 (13%)                 |
| 11 | 324.8  | 0.01311          | H-1→L+2 (11%), HOMO→L+4 (79%)                 |
| 12 | 307.9  | 0.05936          | H-4→L+1 (34%), H-1→L+1 (16%), H-1→L+2 (35%)   |
| 13 | 307.4  | 0.08646          | H-5→LUMO (84%)                                |
| 20 | 275.4  | 0.04416          | H-4→L+1 (32%), H-1→L+2 (46%)                  |
| 21 | 275.2  | 0.56954          | H-5→L+1 (16%), H-4→LUMO (13%), H-1→L+5 (48%)  |
| 22 | 288.1  | 0.01842          | H-6→L+1 (96%)                                 |
| 28 | 247.7  | 0.01056          | H-7→LUMO (55%), H-4→L+2 (20%)                 |
| 30 | 244.7  | 0.24251          | H-7→L+1 (45%), H-5→L+2 (24%)                  |
| 33 | 237.4  | 0.21964          | H-3→L+5 (81%)                                 |
| 35 | 236.0  | 0.01578          | H-9→L+1 (41%), H-1→L+4 (45%)                  |
| 36 | 234.5  | 0.05677          | H-9→LUMO (22%), H-2→L+5 (51%), HOMO→L+4 (11%) |
| 38 | 230.7  | 0.43147          | H-2→L+5 (12%), HOMO→L+4 (52%)                 |
| 39 | 229.9  | 0.02279          | H-9→L+1 (40%), HOMO→L+6 (48%)                 |
| 41 | 223.7  | 0.06388          | H-10→LUMO (54%), HOMO→L+6 (18%)               |

<sup>a</sup> For oscillator strength f > 0.01 except for the lowest-energy transition.

**Table S7.** Selected TD-DFT calculated vertical S<sub>0</sub>→S<sub>n</sub> transitions for [Pd(Me<sub>2</sub>dpb)Cl].<sup>a</sup>

| n | λ / nm | f <sub>osc</sub> | participating MOs (contribution) |
|---|--------|------------------|----------------------------------|
| 1 | 403.1  | 0.00155          | HOMO→LUMO (94%)                  |
| 2 | 393.7  | 0.06978          | HOMO→L+1 (88%)                   |

|    |        |         |                                                               |
|----|--------|---------|---------------------------------------------------------------|
| 5  | 367.9  | 0.01557 | H-1→LUMO (89%)                                                |
| 8  | 330.5  | 0.05802 | H-4→L+1 (25%), H-1→L+1 (56%)                                  |
| 10 | 312.7  | 0.12513 | H-5→L+1 (16%), H-4→LUMO (68%)                                 |
| 12 | 303.8  | 0.03080 | H-4→L+1 (39%), H-1→L+2 (42%)                                  |
| 15 | 306.5  | 0.07723 | H-5→LUMO (12%), HOMO→L+3 (69%)                                |
| 16 | 304.2  | 0.06202 | H-5→L+1 (71%), H-1→L+3 (12%)                                  |
| 22 | 280.8  | 0.04850 | H-2→L+4 (71%)                                                 |
| 24 | 273.6  | 0.03061 | H-4→L+1 (24%), H-1→L+2 (50%)                                  |
| 26 | 269.9  | 0.45647 | H-5→L+2 (11%), H-1→L+3 (51%)                                  |
| 30 | 262.6  | 0.04535 | H-7→L+1 (12%), H-5→L+2 (60%), H-4→L+3 (16%)                   |
| 32 | 248.98 | 0.01860 | H-7→L+1 (55%), H-4→L+2 (20%)                                  |
| 33 | 249.7  | 0.01615 | H-5→L+2 (11%), H-4→L+3 (72%)                                  |
| 34 | 246.6  | 0.34534 | H-7→L+1 (66%)                                                 |
| 42 | 231.7  | 0.15431 | H-6→L+4 (10%), HOMO→L+5 (62%)                                 |
| 43 | 224.4  | 0.03017 | H-10→LUMO (23%), H-9→L+1 (15%), H-1→L+5 (36%), HOMO→L+6 (16%) |
| 45 | 221.3  | 0.01453 | H-10→LUMO (47%), HOMO→L+6 (39%)                               |

<sup>a</sup> For oscillator strength  $f > 0.01$  except for the lowest-energy transition.

**Table S8.** Selected TD-DFT calculated vertical  $S_0 \rightarrow S_n$  transitions for [Ni(Me<sub>2</sub>dpb)Cl].<sup>a</sup>

| n  | $\lambda$ /nm | $f_{osc}$ | participating MOs (contribution)                             |
|----|---------------|-----------|--------------------------------------------------------------|
| 1  | 512.7         | 0.00315   | H-1→LUMO (96%)                                               |
| 5  | 429.5         | 0.06825   | H-2→LUMO (52%), HOMO→L+1 (43%)                               |
| 10 | 390.0         | 0.01432   | H-2→L+1 (62%), H-1→L+3 (16%)                                 |
| 15 | 342.8         | 0.13637   | H-5→L+1 (10%), H-3→LUMO (75%)                                |
| 18 | 319.8         | 0.01868   | H-5→LUMO (35%), H-3→L+1 (15%), H-2→L+2 (13%), HOMO→L+3 (25%) |
| 19 | 316.3         | 0.05371   | H-5→LUMO (55%), H-2→L+2 (11%), HOMO→L+4 (12%)                |
| 22 | 292.4         | 0.13588   | H-3→L+1 (48%), H-2→L+2 (25%)                                 |
| 25 | 294.0         | 0.35489   | H-5→L+1 (38%), H-2→L+4 (37%)                                 |
| 36 | 255.1         | 0.22739   | H-7→L+1 (11%), H-5→L+2 (22%), H-3→L+4 (27%), H-2→L+5 (24%)   |
| 38 | 247.5         | 0.13795   | H-9→L+1 (10%), H-8→L+3 (26%), H-2→L+5 (38%)                  |
| 39 | 245.3         | 0.01394   | H-5→L+4 (67%), HOMO→L+5 (14%)                                |
| 40 | 251.0         | 0.09256   | H-8→L+3 (59%), H-2→L+5 (15%)                                 |
| 41 | 241.2         | 0.11351   | H-9→LUMO (47%), HOMO→L+5 (24%)                               |
| 48 | 237.4         | 0.05961   | H-7→L+2 (80%)                                                |
| 50 | 224.3         | 0.01363   | H-10→LUMO (52%), H-3→L+5 (29%)                               |
| 61 | 220.0         | 0.26143   | H-12→L+1 (92%), H-7→L+4 (44%), H-6→L+3 (24%)                 |

<sup>a</sup> For oscillator strength  $f > 0.01$  except for the lowest-energy transition.

**Table S9.** Selected UV-vis absorption maxima of the reduced and oxidised complexes [M(Me<sub>2</sub>dpb)Cl]<sup>n</sup> <sup>a</sup>

|                             |        | $\lambda_1$ (ε) | $\lambda_2$ (ε) | $\lambda_3$ (ε) | $\lambda_4$ (ε) | $\lambda_5$ (ε) | $\lambda_6$ (ε) |
|-----------------------------|--------|-----------------|-----------------|-----------------|-----------------|-----------------|-----------------|
| [Pt(Me <sub>2</sub> dpb)Cl] | n = -1 | 239             | 276             | 312             | 390             | 415             | 582             |
|                             | n = -2 | 238             | -               | 316             | -               | 418             | 591             |
|                             | n = +1 | 245             | 281             | 323             |                 |                 |                 |
| [Pd(Me <sub>2</sub> dpb)Cl] | n = -1 | 246             | 277             | 319             | 370             | -               | 570             |
|                             | n = -2 | 246             | 274             | -               | 381             | -               | 582             |
|                             | n = +1 | 241             | 271             | 310             |                 |                 |                 |
| [NiMe <sub>2</sub> dpb)Cl]  | n = -1 | 230             | 275             | 330             | -               | 429             | 644             |
|                             | n = -2 | 230             | 248             | -               | 393             | -               | 644             |
|                             | n = +1 | 222             | 252             | 301             |                 |                 |                 |

<sup>a</sup> Generated through electrolysis in THF/*n*-Bu<sub>4</sub>NPF<sub>6</sub>.

**Table S10.** Fractional atomic coordinates ( $\times 10^4$ ) and equivalent isotropic displacement parameters ( $\text{\AA}^2 \times 10^3$ ) for  $[\text{Ni}(\text{Me}_2\text{dpb})\text{Cl}]\cdot\text{CH}_2\text{Cl}_2$ .  $U_{\text{eq}}$  is defined as 1/3 of the trace of the orthogonalised  $U_{ij}$  tensor.

| Atom | x          | y          | z          | U(eq)     |
|------|------------|------------|------------|-----------|
| Ni1  | 5875.0(2)  | 3109.9(5)  | 4083.4(2)  | 11.61(8)  |
| Cl1  | 6354.6(4)  | 3167.8(11) | 3145.8(4)  | 21.88(15) |
| Cl32 | 7550.9(4)  | 2086.5(12) | 1777.4(4)  | 26.08(18) |
| Cl31 | 8300.5(5)  | 3663.4(14) | 2764.8(5)  | 34.8(2)   |
| N2   | 5137.8(11) | 1848(3)    | 3830.7(11) | 14.1(4)   |
| N1   | 6517.9(11) | 4313(3)    | 4540.8(12) | 13.1(4)   |
| C1   | 5484.8(12) | 3046(4)    | 4847.5(12) | 11.0(4)   |
| C2   | 5785.3(13) | 3812(3)    | 5355.5(13) | 12.2(5)   |
| C6   | 4891.3(13) | 2256(3)    | 4893.3(14) | 12.6(5)   |
| C15  | 6401.7(14) | 4533(4)    | 5164.4(14) | 13.8(5)   |
| C4   | 4883.4(14) | 3049(4)    | 5972.3(14) | 16.5(5)   |
| C5   | 4579.5(14) | 2262(4)    | 5474.8(14) | 14.2(5)   |
| C21  | 5030.7(16) | 1273(4)    | 3252.3(15) | 19.4(6)   |
| C25  | 4694.4(14) | 1551(3)    | 4289.5(14) | 13.6(5)   |
| C3   | 5481.2(14) | 3834(4)    | 5940.6(14) | 15.5(5)   |
| C11  | 7061.3(14) | 4913(4)    | 4290.6(16) | 17.5(6)   |
| C24  | 4137.9(15) | 672(4)     | 4148.8(16) | 18.2(5)   |
| C14  | 6852.1(15) | 5352(4)    | 5534.4(16) | 19.2(6)   |
| C22  | 4485.4(16) | 389(4)     | 3090.8(16) | 22.0(6)   |
| C8   | 3940.3(14) | 1453(4)    | 5584.6(15) | 18.2(6)   |
| C13  | 7411.4(15) | 5957(4)    | 5271.8(17) | 21.2(6)   |
| C23  | 4031.9(15) | 84(4)      | 3546.8(17) | 21.2(6)   |
| C7   | 5749.9(16) | 4598(4)    | 6522.5(15) | 20.6(6)   |
| C12  | 7519.3(16) | 5747(4)    | 4640.0(17) | 21.5(6)   |
| C31  | 7833.2(17) | 1899(5)    | 2553.3(15) | 22.5(6)   |

**Table S11.** Anisotropic displacement parameters ( $\text{\AA}^2 \times 10^3$ ) for  $[\text{Ni}(\text{Me}_2\text{dpb})\text{Cl}]\cdot\text{CH}_2\text{Cl}_2$ . The Anisotropic displacement factor exponent takes the form:  $-2\pi^2[h^2a^{*2}U_{11}+2hka^*b^*U_{12}+\dots]$ .

| Atom | U <sub>11</sub> | U <sub>22</sub> | U <sub>33</sub> | U <sub>23</sub> | U <sub>13</sub> | U <sub>12</sub> |
|------|-----------------|-----------------|-----------------|-----------------|-----------------|-----------------|
| Ni1  | 10.51(14)       | 12.21(14)       | 12.10(15)       | 1.40(14)        | 1.24(13)        | -0.50(14)       |
| Cl1  | 19.7(3)         | 29.0(4)         | 17.0(3)         | 2.0(3)          | 5.2(3)          | -3.1(3)         |
| Cl32 | 26.8(4)         | 29.4(4)         | 22.1(4)         | 3.1(3)          | -3.3(3)         | -1.9(3)         |
| Cl31 | 39.0(5)         | 39.1(5)         | 26.4(4)         | 2.9(4)          | -10.6(4)        | -8.6(4)         |
| N2   | 13.1(10)        | 14.5(10)        | 14.6(10)        | 0.7(10)         | -0.9(8)         | 1.0(9)          |
| N1   | 8.9(9)          | 11.4(10)        | 18.9(11)        | 0.9(9)          | 1.1(8)          | -0.2(8)         |
| C1   | 10.6(10)        | 11.2(10)        | 11.2(10)        | 1.5(10)         | 1.0(8)          | 0.8(9)          |
| C2   | 12.4(12)        | 10.9(10)        | 13.4(12)        | 2.2(9)          | 0.2(9)          | 1.9(9)          |
| C6   | 10.3(11)        | 11.2(11)        | 16.2(13)        | 2.6(10)         | -0.7(9)         | -0.7(9)         |
| C15  | 13.2(11)        | 10.9(11)        | 17.4(13)        | 1.7(10)         | -1.2(10)        | 0.7(9)          |
| C4   | 17.9(12)        | 18.1(12)        | 13.5(12)        | 3.9(12)         | 4.5(10)         | 6.6(11)         |
| C5   | 13.6(11)        | 11.5(11)        | 17.5(13)        | 4.0(10)         | 3.3(10)         | 3.9(9)          |
| C21  | 22.1(15)        | 22.6(14)        | 13.5(13)        | -0.3(12)        | -0.5(11)        | -1.6(12)        |
| C25  | 12.6(11)        | 11.1(11)        | 17.3(12)        | 2.4(10)         | -1.6(10)        | 1.0(9)          |
| C3   | 19.0(13)        | 13.7(11)        | 13.6(12)        | 2.5(11)         | -0.7(11)        | 5.2(10)         |
| C11  | 11.0(11)        | 14.1(12)        | 27.3(16)        | 2.0(12)         | 1.6(11)         | 0.0(10)         |
| C24  | 13.5(11)        | 16.3(12)        | 25.0(15)        | 3.5(12)         | -0.9(12)        | -2.4(11)        |
| C14  | 18.4(14)        | 15.4(12)        | 23.9(15)        | 0.3(12)         | -6.7(12)        | -0.8(11)        |
| C22  | 24.5(15)        | 21.9(14)        | 19.8(15)        | -2.8(13)        | -7.7(12)        | -0.9(13)        |
| C8   | 14.1(12)        | 19.0(13)        | 21.5(14)        | 4.5(12)         | 4.9(11)         | 0.3(11)         |
| C13  | 15.1(13)        | 15.6(13)        | 32.9(18)        | -1.3(13)        | -6.6(12)        | -1.8(11)        |
| C23  | 16.4(14)        | 17.6(13)        | 29.6(17)        | 0.0(12)         | -8.5(12)        | -1.9(11)        |

|     |          |          |          |          |          |         |
|-----|----------|----------|----------|----------|----------|---------|
| C7  | 25.3(16) | 22.5(15) | 13.9(13) | -1.3(12) | -1.0(11) | 3.4(12) |
| C12 | 11.6(12) | 13.5(12) | 39.4(19) | -0.2(13) | 2.4(13)  | 0.4(10) |
| C31 | 24.7(15) | 25.7(15) | 17.3(13) | 6.0(14)  | 2.1(11)  | 4.8(14) |

**Table S12.** Selected bond lengths for [Ni(Me<sub>2</sub>dpb)Cl]·CH<sub>2</sub>Cl<sub>2</sub>.

| Atom | Atom | Length/Å  | Atom | Atom | Length/Å |
|------|------|-----------|------|------|----------|
| Ni1  | Cl1  | 2.2457(8) | C6   | C5   | 1.406(4) |
| Ni1  | N2   | 1.920(2)  | C6   | C25  | 1.467(4) |
| Ni1  | N1   | 1.921(2)  | C15  | C14  | 1.394(4) |
| Ni1  | C1   | 1.830(3)  | C4   | C5   | 1.389(4) |
| Cl32 | C31  | 1.769(3)  | C4   | C3   | 1.402(4) |
| Cl31 | C31  | 1.767(4)  | C5   | C8   | 1.506(4) |
| N2   | C21  | 1.338(4)  | C21  | C22  | 1.386(5) |
| N2   | C25  | 1.373(4)  | C25  | C24  | 1.393(4) |
| N1   | C15  | 1.368(4)  | C3   | C7   | 1.495(4) |
| N1   | C11  | 1.347(4)  | C11  | C12  | 1.386(5) |
| C1   | C2   | 1.396(4)  | C24  | C23  | 1.388(5) |
| C1   | C6   | 1.398(4)  | C14  | C13  | 1.387(5) |
| C2   | C15  | 1.473(4)  | C22  | C23  | 1.385(5) |
| C2   | C3   | 1.406(4)  | C13  | C12  | 1.381(5) |

**Table S13.** Selected bond angles for [Ni(Me<sub>2</sub>dpb)Cl]·CH<sub>2</sub>Cl<sub>2</sub>.

| Atom | Atom | Atom | Angle/°    | Atom | Atom | Atom | Angle/°    |
|------|------|------|------------|------|------|------|------------|
| N2   | Ni1  | Cl1  | 96.91(8)   | N1   | C15  | C14  | 119.5(3)   |
| N2   | Ni1  | N1   | 165.54(11) | C14  | C15  | C2   | 128.3(3)   |
| N1   | Ni1  | Cl1  | 97.49(8)   | C5   | C4   | C3   | 125.0(3)   |
| C1   | Ni1  | Cl1  | 179.58(10) | C6   | C5   | C8   | 123.5(3)   |
| C1   | Ni1  | N2   | 82.91(11)  | C4   | C5   | C6   | 117.8(3)   |
| C1   | Ni1  | N1   | 82.68(11)  | C4   | C5   | C8   | 118.7(3)   |
| C21  | N2   | Ni1  | 125.0(2)   | N2   | C21  | C22  | 122.8(3)   |
| C21  | N2   | C25  | 119.3(3)   | N2   | C25  | C6   | 111.9(2)   |
| C25  | N2   | Ni1  | 115.7(2)   | N2   | C25  | C24  | 120.0(3)   |
| C15  | N1   | Ni1  | 115.81(19) | C24  | C25  | C6   | 128.1(3)   |
| C11  | N1   | Ni1  | 124.6(2)   | C2   | C3   | C7   | 125.2(3)   |
| C11  | N1   | C15  | 119.6(3)   | C4   | C3   | C2   | 116.3(3)   |
| C2   | C1   | Ni1  | 118.8(2)   | C4   | C3   | C7   | 118.5(3)   |
| C2   | C1   | C6   | 122.9(3)   | N1   | C11  | C12  | 122.8(3)   |
| C6   | C1   | Ni1  | 118.3(2)   | C23  | C24  | C25  | 120.2(3)   |
| C1   | C2   | C15  | 110.5(2)   | C13  | C14  | C15  | 120.3(3)   |
| C1   | C2   | C3   | 119.6(3)   | C23  | C22  | C21  | 118.7(3)   |
| C3   | C2   | C15  | 129.9(3)   | C12  | C13  | C14  | 119.6(3)   |
| C1   | C6   | C5   | 118.4(3)   | C22  | C23  | C24  | 119.1(3)   |
| C1   | C6   | C25  | 111.1(3)   | C13  | C12  | C11  | 118.2(3)   |
| C5   | C6   | C25  | 130.5(3)   | Cl31 | C31  | Cl32 | 111.10(19) |
| N1   | C15  | C2   | 112.2(2)   |      |      |      |            |

**Table S14.** Selected torsion angles for [Ni(Me<sub>2</sub>dpb)Cl]·CH<sub>2</sub>Cl<sub>2</sub>.

| A   | B  | C   | D   | Angle/°   | A   | B   | C   | D   | Angle/°   |
|-----|----|-----|-----|-----------|-----|-----|-----|-----|-----------|
| Ni1 | N2 | C21 | C22 | -179.0(2) | C2  | C1  | C6  | C25 | -179.5(3) |
| Ni1 | N2 | C25 | C6  | -1.1(3)   | C2  | C15 | C14 | C13 | -180.0(3) |
| Ni1 | N2 | C25 | C24 | 178.9(2)  | C6  | C1  | C2  | C15 | -180.0(3) |
| Ni1 | N1 | C15 | C2  | -1.2(3)   | C6  | C1  | C2  | C3  | -1.3(4)   |
| Ni1 | N1 | C15 | C14 | 178.2(2)  | C6  | C25 | C24 | C23 | -179.6(3) |
| Ni1 | N1 | C11 | C12 | -178.7(2) | C15 | N1  | C11 | C12 | 0.5(4)    |
| Ni1 | C1 | C2  | C15 | -1.2(3)   | C15 | C2  | C3  | C4  | 179.0(3)  |
| Ni1 | C1 | C2  | C3  | 177.5(2)  | C15 | C2  | C3  | C7  | -2.0(5)   |



|     |     |     |     |           |     |     |     |     |           |
|-----|-----|-----|-----|-----------|-----|-----|-----|-----|-----------|
| Ni1 | C1  | C6  | C5  | -177.6(2) | C15 | C14 | C13 | C12 | 0.2(5)    |
| Ni1 | C1  | C6  | C25 | 1.7(3)    | C5  | C6  | C25 | N2  | 178.9(3)  |
| N2  | Ni1 | C1  | C2  | 179.4(2)  | C5  | C6  | C25 | C24 | -1.0(5)   |
| N2  | Ni1 | C1  | C6  | -1.8(2)   | C5  | C4  | C3  | C2  | 0.2(4)    |
| N2  | C21 | C22 | C23 | -0.1(5)   | C5  | C4  | C3  | C7  | -178.9(3) |
| N2  | C25 | C24 | C23 | 0.5(4)    | C21 | N2  | C25 | C6  | 179.5(3)  |
| N1  | Ni1 | C1  | C2  | 0.5(2)    | C21 | N2  | C25 | C24 | -0.6(4)   |
| N1  | Ni1 | C1  | C6  | 179.3(2)  | C21 | C22 | C23 | C24 | 0.0(5)    |
| N1  | C15 | C14 | C13 | 0.7(4)    | C25 | N2  | C21 | C22 | 0.4(5)    |
| N1  | C11 | C12 | C13 | 0.4(5)    | C25 | C6  | C5  | C4  | -179.5(3) |
| C1  | C2  | C15 | N1  | 1.5(3)    | C25 | C6  | C5  | C8  | 1.0(5)    |
| C1  | C2  | C15 | C14 | -177.9(3) | C25 | C24 | C23 | C22 | -0.2(5)   |
| C1  | C2  | C3  | C4  | 0.6(4)    | C3  | C2  | C15 | N1  | -177.0(3) |
| C1  | C2  | C3  | C7  | 179.6(3)  | C3  | C2  | C15 | C14 | 3.6(5)    |
| C1  | C6  | C5  | C4  | -0.3(4)   | C3  | C4  | C5  | C6  | -0.3(4)   |
| C1  | C6  | C5  | C8  | -179.8(3) | C3  | C4  | C5  | C8  | 179.2(3)  |
| C1  | C6  | C25 | N2  | -0.4(3)   | C11 | N1  | C15 | C2  | 179.5(3)  |
| C1  | C6  | C25 | C24 | 179.7(3)  | C11 | N1  | C15 | C14 | -1.0(4)   |
| C2  | C1  | C6  | C5  | 1.2(4)    | C14 | C13 | C12 | C11 | -0.7(5)   |

**Table S15.** Hydrogen atom coordinates ( $\text{\AA}\times 10^4$ ) and isotropic displacement parameters ( $\text{\AA}^2\times 10^3$ ) for  $[\text{Ni}(\text{Me}_2\text{dpb})\text{Cl}]\cdot\text{CH}_2\text{Cl}_2$ .

| Atom | <i>x</i> | <i>y</i> | <i>z</i> | U(eq) |
|------|----------|----------|----------|-------|
| H4   | 4670.11  | 3055.22  | 6363.73  | 20    |
| H21  | 5341.8   | 1479.13  | 2939.11  | 23    |
| H11  | 7133.63  | 4757.9   | 3856.28  | 21    |
| H24  | 3829.96  | 474.53   | 4465.77  | 22    |
| H14  | 6775.67  | 5497.28  | 5968.53  | 23    |
| H22  | 4423.89  | -0.91    | 2675.37  | 26    |
| H8A  | 3626.23  | 1942.32  | 5298.47  | 27    |
| H8B  | 3806.72  | 1653.02  | 6016.93  | 27    |
| H8C  | 3972.05  | 235.21   | 5509.73  | 27    |
| H13  | 7718.42  | 6511.96  | 5524.95  | 25    |
| H23  | 3653.58  | -518.31  | 3449.09  | 25    |
| H7A  | 6125.45  | 3956.17  | 6654.54  | 31    |
| H7B  | 5428.04  | 4568.49  | 6854.01  | 31    |
| H7C  | 5872.14  | 5771.23  | 6440.42  | 31    |
| H12  | 7896.98  | 6163.74  | 4450.19  | 26    |
| H31A | 7466.76  | 1802.39  | 2842.14  | 27    |
| H31B | 8091.84  | 859.27   | 2592.12  | 2     |

**Table S16.** Fractional atomic coordinates ( $\times 10^4$ ) and equivalent isotropic displacement parameters ( $\text{\AA}^2\times 10^3$ ) for  $[\text{Pd}(\text{Me}_2\text{dpb})\text{Cl}]\cdot\text{U}_{\text{eq}}$  is defined as 1/3 of the trace of the orthogonalised  $\text{U}_{\text{ij}}$  tensor.

| Atom | <i>x</i>   | <i>y</i>  | <i>z</i>  | U(eq)     |
|------|------------|-----------|-----------|-----------|
| Pd1  | 2441.7(2)  | 3514.7(2) | 4405.2(2) | 10.34(1)  |
| Cl1  | 2245.5(2)  | 1608.2(2) | 3599.2(2) | 18.51(3)  |
| N1   | 1655.1(6)  | 2738.7(5) | 5303.3(3) | 12.37(6)  |
| N2   | 3288.0(6)  | 4806.9(5) | 3723.2(3) | 13.24(7)  |
| C1   | 2534.0(6)  | 5024.9(5) | 5015.7(3) | 11.28(7)  |
| C25  | 3515.1(7)  | 6037.3(5) | 3998.2(3) | 13.64(7)  |
| C2   | 2029.4(6)  | 4911.0(5) | 5706.8(3) | 11.96(7)  |
| C15  | 1539.9(7)  | 3590.1(5) | 5865.8(3) | 12.30(7)  |
| C6   | 3078.0(7)  | 6181.0(5) | 4741.0(3) | 12.63(7)  |
| C11  | 1297.9(9)  | 1487.1(6) | 5371.2(4) | 16.52(9)  |
| C12  | 792.3(9)   | 994.7(7)  | 6000.4(4) | 19.5(1)   |
| C8   | 3747.5(10) | 8595.2(6) | 4988.5(5) | 21.53(11) |

|     |           |           |           |           |
|-----|-----------|-----------|-----------|-----------|
| C14 | 1036.1(8) | 3137.3(7) | 6511.1(3) | 17.41(9)  |
| C3  | 2043.9(7) | 6030.0(6) | 6146.9(3) | 14.42(8)  |
| C5  | 3137.9(7) | 7295.8(5) | 5189.6(3) | 15.20(8)  |
| C21 | 3630.9(8) | 4511.1(7) | 3053.4(3) | 17.55(9)  |
| C13 | 655.0(9)  | 1842.5(7) | 6573.6(4) | 19.97(10) |
| C24 | 4095.2(9) | 6984.8(7) | 3564.9(4) | 19.71(10) |
| C22 | 4227.1(9) | 5416.4(8) | 2607.8(4) | 21.77(11) |
| C23 | 4455.5(9) | 6666.7(8) | 2872.3(4) | 22.88(12) |
| C7  | 1477.1(8) | 6073.8(7) | 6886.3(4) | 19.39(10) |
| C4  | 2604.4(8) | 7174.8(6) | 5872.1(4) | 16.49(8)  |

**Table S17.** Anisotropic displacement parameters ( $\text{\AA}^2 \times 10^3$ ) for [Pd(Me<sub>2</sub>dpb)Cl]. The anisotropic displacement factor exponent takes the form:  $-2\pi^2[h^2a^{*2}U_{11}+2hk a^*b^*U_{12}+\dots]$ .

| Atom | U <sub>11</sub> | U <sub>22</sub> | U <sub>33</sub> | U <sub>23</sub> | U <sub>13</sub> | U <sub>12</sub> |
|------|-----------------|-----------------|-----------------|-----------------|-----------------|-----------------|
| Pd1  | 11.86(2)        | 10.50(2)        | 8.90(2)         | 0.16(1)         | 2.73(1)         | -0.22(1)        |
| Cl1  | 27.98(7)        | 14.36(5)        | 13.48(5)        | -2.77(4)        | 4.96(5)         | -0.53(4)        |
| N1   | 13.79(15)       | 12.48(15)       | 10.93(14)       | 0.68(12)        | 2.74(12)        | -1.97(12)       |
| N2   | 13.10(15)       | 15.63(17)       | 11.69(15)       | 2.39(13)        | 4.19(12)        | 0.82(13)        |
| C1   | 11.29(15)       | 11.23(16)       | 11.32(16)       | -0.07(13)       | 2.36(12)        | -0.50(12)       |
| C25  | 11.67(16)       | 14.57(18)       | 14.59(18)       | 3.95(15)        | 2.52(14)        | -0.51(14)       |
| C2   | 11.52(16)       | 13.50(17)       | 10.90(16)       | -1.08(13)       | 2.46(13)        | -0.18(13)       |
| C15  | 11.67(16)       | 15.01(18)       | 10.43(16)       | 0.55(13)        | 2.77(13)        | -0.84(13)       |
| C6   | 11.92(16)       | 11.53(17)       | 14.11(18)       | 1.23(14)        | 1.90(13)        | -0.53(13)       |
| C11  | 20.2(2)         | 13.8(2)         | 15.4(2)         | 1.78(15)        | 3.18(17)        | -3.87(16)       |
| C12  | 21.6(2)         | 18.0(2)         | 18.8(2)         | 5.61(18)        | 3.87(18)        | -4.82(18)       |
| C8   | 21.9(3)         | 11.8(2)         | 29.2(3)         | 1.57(19)        | 1.4(2)          | -1.71(17)       |
| C14  | 19.0(2)         | 21.9(2)         | 12.78(18)       | 2.03(17)        | 6.55(16)        | -0.99(18)       |
| C3   | 13.15(17)       | 16.4(2)         | 13.25(18)       | -3.45(15)       | 1.67(14)        | 1.29(15)        |
| C5   | 13.99(18)       | 11.19(17)       | 19.0(2)         | -0.05(15)       | 0.22(15)        | -0.12(14)       |
| C21  | 18.2(2)         | 22.5(2)         | 13.39(19)       | 3.12(17)        | 6.72(16)        | 2.78(18)        |
| C13  | 20.4(2)         | 24.3(3)         | 16.4(2)         | 6.61(19)        | 6.39(18)        | -2.7(2)         |
| C24  | 19.2(2)         | 19.5(2)         | 20.6(2)         | 7.64(19)        | 4.52(18)        | -3.40(18)       |
| C22  | 20.2(2)         | 31.0(3)         | 15.9(2)         | 7.9(2)          | 7.95(18)        | 2.8(2)          |
| C23  | 19.8(2)         | 29.0(3)         | 20.6(3)         | 11.9(2)         | 6.1(2)          | -2.2(2)         |
| C7   | 18.2(2)         | 25.3(3)         | 15.1(2)         | -6.53(19)       | 4.43(17)        | 1.30(19)        |
| C4   | 16.9(2)         | 13.27(19)       | 18.1(2)         | -3.90(16)       | 0.86(16)        | 1.10(15)        |

**Table S18.** Selected bond lengths for [Pd(Me<sub>2</sub>dpb)Cl].

| Atom | Atom | Length/ $\text{\AA}$ | Atom | Atom | Length/ $\text{\AA}$ |
|------|------|----------------------|------|------|----------------------|
| Pd1  | Cl1  | 2.45121(18)          | C2   | C3   | 1.4108(8)            |
| Pd1  | N1   | 2.0349(5)            | C15  | C14  | 1.3993(8)            |
| Pd1  | N2   | 2.0354(5)            | C6   | C5   | 1.4126(8)            |
| Pd1  | C1   | 1.9158(5)            | C11  | C12  | 1.3884(9)            |
| N1   | C15  | 1.3709(7)            | C12  | C13  | 1.3875(11)           |
| N1   | C11  | 1.3419(7)            | C8   | C5   | 1.5048(9)            |
| N2   | C25  | 1.3711(8)            | C14  | C13  | 1.3885(10)           |
| N2   | C21  | 1.3398(8)            | C3   | C7   | 1.5067(8)            |
| C1   | C2   | 1.4030(7)            | C3   | C4   | 1.3984(9)            |
| C1   | C6   | 1.4032(7)            | C5   | C4   | 1.3999(9)            |
| C25  | C6   | 1.4725(8)            | C21  | C22  | 1.3882(9)            |
| C25  | C24  | 1.3981(8)            | C24  | C23  | 1.3903(11)           |
| C2   | C15  | 1.4713(8)            | C22  | C23  | 1.3841(12)           |

**Table S19.** Selected bond angles for [Pd(Me<sub>2</sub>dpb)Cl].

| Atom | Atom | Atom | Angle/ $^\circ$ | Atom | Atom | Atom | Angle/ $^\circ$ |
|------|------|------|-----------------|------|------|------|-----------------|
|------|------|------|-----------------|------|------|------|-----------------|

|     |     |     |             |     |     |     |           |
|-----|-----|-----|-------------|-----|-----|-----|-----------|
| N1  | Pd1 | Cl1 | 99.765(15)  | N1  | C15 | C2  | 113.16(4) |
| N1  | Pd1 | N2  | 161.30(2)   | N1  | C15 | C14 | 119.08(5) |
| N2  | Pd1 | Cl1 | 98.935(15)  | C14 | C15 | C2  | 127.74(5) |
| C1  | Pd1 | Cl1 | 178.272(16) | C1  | C6  | C25 | 112.93(5) |
| C1  | Pd1 | N1  | 80.72(2)    | C1  | C6  | C5  | 118.12(5) |
| C1  | Pd1 | N2  | 80.59(2)    | C5  | C6  | C25 | 128.95(5) |
| C15 | N1  | Pd1 | 115.13(4)   | N1  | C11 | C12 | 122.40(6) |
| C11 | N1  | Pd1 | 124.32(4)   | C13 | C12 | C11 | 117.95(6) |
| C11 | N1  | C15 | 120.53(5)   | C13 | C14 | C15 | 119.98(6) |
| C25 | N2  | Pd1 | 115.27(4)   | C2  | C3  | C7  | 124.35(6) |
| C21 | N2  | Pd1 | 124.04(4)   | C4  | C3  | C2  | 117.58(5) |
| C21 | N2  | C25 | 120.69(5)   | C4  | C3  | C7  | 118.07(5) |
| C2  | C1  | Pd1 | 117.92(4)   | C6  | C5  | C8  | 124.66(6) |
| C2  | C1  | C6  | 123.95(5)   | C4  | C5  | C6  | 117.40(5) |
| C6  | C1  | Pd1 | 118.12(4)   | C4  | C5  | C8  | 117.94(6) |
| N2  | C25 | C6  | 113.08(5)   | N2  | C21 | C22 | 122.38(7) |
| N2  | C25 | C24 | 118.94(6)   | C12 | C13 | C14 | 120.05(6) |
| C24 | C25 | C6  | 127.98(6)   | C23 | C24 | C25 | 119.93(7) |
| C1  | C2  | C15 | 113.05(5)   | C23 | C22 | C21 | 117.92(6) |
| C1  | C2  | C3  | 118.05(5)   | C22 | C23 | C24 | 120.15(6) |
| C3  | C2  | C15 | 128.90(5)   | C3  | C4  | C5  | 124.87(5) |

**Table S20.** Selected torsion angles for [Pd(Me<sub>2</sub>dpb)Cl].

| A   | B   | C   | D   | Angle/°    | A   | B   | C   | D   | Angle/°    |
|-----|-----|-----|-----|------------|-----|-----|-----|-----|------------|
| Pd1 | N1  | C15 | C2  | -0.48(6)   | C25 | C24 | C23 | C22 | 0.56(10)   |
| Pd1 | N1  | C15 | C14 | -178.96(4) | C2  | C1  | C6  | C25 | -179.33(5) |
| Pd1 | N1  | C11 | C12 | 178.88(5)  | C2  | C1  | C6  | C5  | 0.64(8)    |
| Pd1 | N2  | C25 | C6  | -0.56(6)   | C2  | C15 | C14 | C13 | -178.47(6) |
| Pd1 | N2  | C25 | C24 | 179.96(4)  | C2  | C3  | C4  | C5  | 0.60(9)    |
| Pd1 | N2  | C21 | C22 | -179.18(5) | C15 | N1  | C11 | C12 | 0.36(9)    |
| Pd1 | C1  | C2  | C15 | 1.73(6)    | C15 | C2  | C3  | C7  | -2.06(9)   |
| Pd1 | C1  | C2  | C3  | -178.02(4) | C15 | C2  | C3  | C4  | 178.69(5)  |
| Pd1 | C1  | C6  | C25 | -0.27(6)   | C15 | C14 | C13 | C12 | 0.74(10)   |
| Pd1 | C1  | C6  | C5  | 179.70(4)  | C6  | C1  | C2  | C15 | -179.22(5) |
| N1  | C15 | C14 | C13 | -0.24(9)   | C6  | C1  | C2  | C3  | 1.03(8)    |
| N1  | C11 | C12 | C13 | 0.14(10)   | C6  | C25 | C24 | C23 | 179.65(6)  |
| N2  | C25 | C6  | C1  | 0.53(7)    | C6  | C5  | C4  | C3  | 1.06(9)    |
| N2  | C25 | C6  | C5  | -179.43(5) | C11 | N1  | C15 | C2  | 178.17(5)  |
| N2  | C25 | C24 | C23 | -0.96(9)   | C11 | N1  | C15 | C14 | -0.30(8)   |
| N2  | C21 | C22 | C23 | -0.48(10)  | C11 | C12 | C13 | C14 | -0.68(10)  |
| C1  | C2  | C15 | N1  | -0.73(7)   | C8  | C5  | C4  | C3  | -178.41(6) |
| C1  | C2  | C15 | C14 | 177.58(6)  | C3  | C2  | C15 | N1  | 178.99(5)  |
| C1  | C2  | C3  | C7  | 177.65(5)  | C3  | C2  | C15 | C14 | -2.70(9)   |
| C1  | C2  | C3  | C4  | -1.61(8)   | C21 | N2  | C25 | C6  | -179.88(5) |
| C1  | C6  | C5  | C8  | 177.80(6)  | C21 | N2  | C25 | C24 | 0.64(8)    |
| C1  | C6  | C5  | C4  | -1.63(8)   | C21 | C22 | C23 | C24 | 0.14(10)   |
| C25 | N2  | C21 | C22 | 0.08(9)    | C24 | C25 | C6  | C1  | 179.96(6)  |
| C25 | C6  | C5  | C8  | -2.23(9)   | C24 | C25 | C6  | C5  | 0.00(10)   |
| C25 | C6  | C5  | C4  | 178.33(5)  | C7  | C3  | C4  | C5  | -178.70(6) |

**Table S21.** Hydrogen atom coordinates (Å×10<sup>4</sup>) and isotropic displacement parameters (Å<sup>2</sup>×10<sup>3</sup>) for [Pd(Me<sub>2</sub>dpb)Cl].

| Atom | x       | y       | z       | U(eq) |
|------|---------|---------|---------|-------|
| H11  | 1394.43 | 917.22  | 4974.2  | 20    |
| H12  | 547.9   | 104.62  | 6037.4  | 23    |
| H8A  | 4911.07 | 8517.75 | 4892.2  | 32    |
| H8B  | 3757.4  | 9194.82 | 5404.65 | 32    |
| H8C  | 2971.03 | 8919.45 | 4537.67 | 32    |

|     |         |         |         |    |
|-----|---------|---------|---------|----|
| H14 | 954.82  | 3715.6  | 6906.24 | 21 |
| H21 | 3459.84 | 3650.64 | 2877.11 | 21 |
| H13 | 299.95  | 1536.97 | 7009.19 | 24 |
| H24 | 4242.84 | 7845.08 | 3743.57 | 24 |
| H22 | 4470.75 | 5185.1  | 2136.13 | 26 |
| H23 | 4859.46 | 7308.85 | 2579.88 | 27 |
| H7A | 315.93  | 5716.3  | 6823.98 | 29 |
| H7B | 1475.91 | 6968.1  | 7057.47 | 29 |
| H7C | 2270.99 | 5565.49 | 7258.25 | 29 |
| H4  | 2624.71 | 7926.39 | 6170.92 | 20 |

## References

- (1) Von der Stück, R.; Schmitz, S.; Klein, A. C–X vs C–H activation for the synthesis of the cyclometalated complexes [Pd(YPhbpy)X] (HPhbpy = 6-phenyl-2,2'-bipyridine; X/Y = (pseudo)halides), *Inorg. Chem. Res.* **2021**, 5, 173–192.
- (2) Schulze, B.; Friebe, C.; Jäger, M.; Görls, H.; Birckner, E.; Winter, A.; Schubert, U.S. Pt<sup>II</sup> Phosphors with Click-Derived 1,2,3-Triazole-Containing Tridentate Chelates, *Organometallics* **2018**, 37, 145–155.
