# Supplementary material for: Photoluminescence of Ni(II), Pd(II), and Pt(II) Complexes [M(Me2dpb)Cl] Obtained from C‒H Activation of 1,5-Di(2-pyridyl)-2,4-dimethylbenzene (Me2dpbH)
Source: MDPI journal article supplement (doi:10.3390/molecules26165051), 2021-08-20
Supplement: s1 [file s1]

## Supplementary Materials II – NMR and MS data

for

Photoluminescence of Ni(II), Pd(II), and Pt(II) complexes [M(Me<sub>2</sub>dpb)Cl] obtained from C–H activation of 1,5-di(2-pyridyl)-2,4-dimethylbenzene (Me<sub>2</sub>dpbH)

### Contents:

- Figure. S001.** 300 MHz <sup>1</sup>H-NMR spectrum of 1,5-di(2-pyridyl)-2,4-dimethylbenzene measured in DMSO-d<sub>6</sub> at RT.
- Figure. S002.** 75 MHz <sup>13</sup>C-NMR spectrum of 1,5-di(2-pyridyl)-2,4-dimethylbenzene measured in DMSO-d<sub>6</sub> at RT.
- Figure. S003.** H,C-HSQC spectrum of 1,5-di(2-pyridyl)-2,4-dimethylbenzene measured in DMSO-d<sub>6</sub> at RT.
- Figure. S004.** H,H-COSY spectrum of 1,5-di(2-pyridyl)-2,4-dimethylbenzene measured in DMSO-d<sub>6</sub> at RT.
- Figure. S005.** 300 MHz <sup>1</sup>H-NMR spectrum of [Ni(Me<sub>2</sub>dpb)Cl] measured in CD<sub>2</sub>Cl<sub>2</sub> at RT.
- Figure. S006.** 75 MHz <sup>13</sup>C-NMR spectrum of [Ni(Me<sub>2</sub>dpb)Cl] measured in CD<sub>2</sub>Cl<sub>2</sub> at RT.
- Figure. S007.** H,C-HSQC spectrum of [Ni(Me<sub>2</sub>dpb)Cl] measured in CD<sub>2</sub>Cl<sub>2</sub> at RT.
- Figure. S008.** H,H-COSY spectrum of [Ni(Me<sub>2</sub>dpb)Cl] measured in CD<sub>2</sub>Cl<sub>2</sub> at RT.
- Figure. S009.** 300 MHz <sup>1</sup>H-NMR spectrum of [Pd(Me<sub>2</sub>dpb)Cl] measured in CD<sub>2</sub>Cl<sub>2</sub> at RT.
- Figure. S010.** 75 MHz <sup>13</sup>C-NMR spectrum of [Pd(Me<sub>2</sub>dpb)Cl] measured in CD<sub>2</sub>Cl<sub>2</sub> at RT.
- Figure. S011.** H,C-HSQC spectrum of [Pd(Me<sub>2</sub>dpb)Cl] measured in CD<sub>2</sub>Cl<sub>2</sub> at RT.
- Figure. S012.** H,H-COSY spectrum of [Pd(Me<sub>2</sub>dpb)Cl] measured in CD<sub>2</sub>Cl<sub>2</sub> at RT.
- Figure. S013.** 300 MHz <sup>1</sup>H-NMR spectrum of [Pt(Me<sub>2</sub>dpb)Cl] measured in CD<sub>2</sub>Cl<sub>2</sub> at RT.
- Figure. S014.** 75 MHz <sup>13</sup>C-NMR spectrum of [Pt(Me<sub>2</sub>dpb)Cl] measured in CD<sub>2</sub>Cl<sub>2</sub> at RT.
- Figure. S015.** H,C-HSQC spectrum of [Pt(Me<sub>2</sub>dpb)Cl] measured in CD<sub>2</sub>Cl<sub>2</sub> at RT.
- Figure. S016.** H,H-COSY spectrum of [Pt(Me<sub>2</sub>dpb)Cl] measured in CD<sub>2</sub>Cl<sub>2</sub> at RT.
- Figure. S017.** <sup>195</sup>Pt{1H} NMR spectrum of [Pt(Me<sub>2</sub>dpb)Cl] measured in DMSO-d<sub>6</sub> at RT.
- Figure. S018.** H,Pt-HMBC spectrum of [Pt(Me<sub>2</sub>dpb)Cl] measured in DMSO-d<sub>6</sub> at RT.
- Figure. S019.** MS-EI(+) of 1,5-di(2-pyridyl)-2,4-dimethylbenzene (Me<sub>2</sub>dpbH)
- Figure. S020.** MS-EI(+) of [Pt(Me<sub>2</sub>dpb)Cl]
- Figure. S021.** MS-EI(+) of [Pd(Me<sub>2</sub>dpb)Cl]
- Figure. S022.** MS-EI(+) of [Ni(Me<sub>2</sub>dpb)Cl]
- Figure S023.** 300 MHz <sup>1</sup>H NMR spectrum of [Pd<sub>4</sub>(μ-κ<sup>2</sup>,κ<sup>2</sup>dpb)<sub>2</sub>(μ-κ<sup>1</sup>,κ<sup>1</sup>-OAc)<sub>4</sub>] in CD<sub>2</sub>Cl<sub>2</sub>.
- Figure S024.** 300 MHz <sup>1</sup>H NMR spectrum of [Pd<sub>4</sub>(μ-κ<sup>2</sup>,κ<sup>2</sup>dpb)<sub>2</sub>(μ-κ<sup>1</sup>,κ<sup>1</sup>-OAc)<sub>4</sub>] with traces of [Pd(PyPhPy)Cl] in CD<sub>2</sub>Cl<sub>2</sub>.
- Figure S025.** EI-MS(+) of the product mixture of [Pd<sub>4</sub>(μ-κ<sup>2</sup>,κ<sup>2</sup>dpb)<sub>2</sub>(μ-κ<sup>1</sup>,κ<sup>1</sup>-OAc)<sub>4</sub>] with traces of [Pd(PyPhPy)Cl].
- Figure S026.** 300 MHz <sup>1</sup>H NMR spectrum of [Pd<sub>4</sub>(μ-κ<sup>2</sup>,κ<sup>2</sup>dpb)<sub>2</sub>(μ-κ<sup>1</sup>,κ<sup>1</sup>-OPiv)<sub>4</sub>] in DMSO-d<sub>6</sub>.
- Figure S027.** UV-vis absorption spectra of [Pd<sub>4</sub>(μ-κ<sup>2</sup>,κ<sup>2</sup>dpb)<sub>2</sub>(μ-κ<sup>1</sup>,κ<sup>1</sup>-OAc)<sub>4</sub>] and [Pd<sub>4</sub>(μ-κ<sup>2</sup>,κ<sup>2</sup>dpb)<sub>2</sub>(μ-κ<sup>1</sup>,κ<sup>1</sup>-OPiv)<sub>4</sub>] in THF.

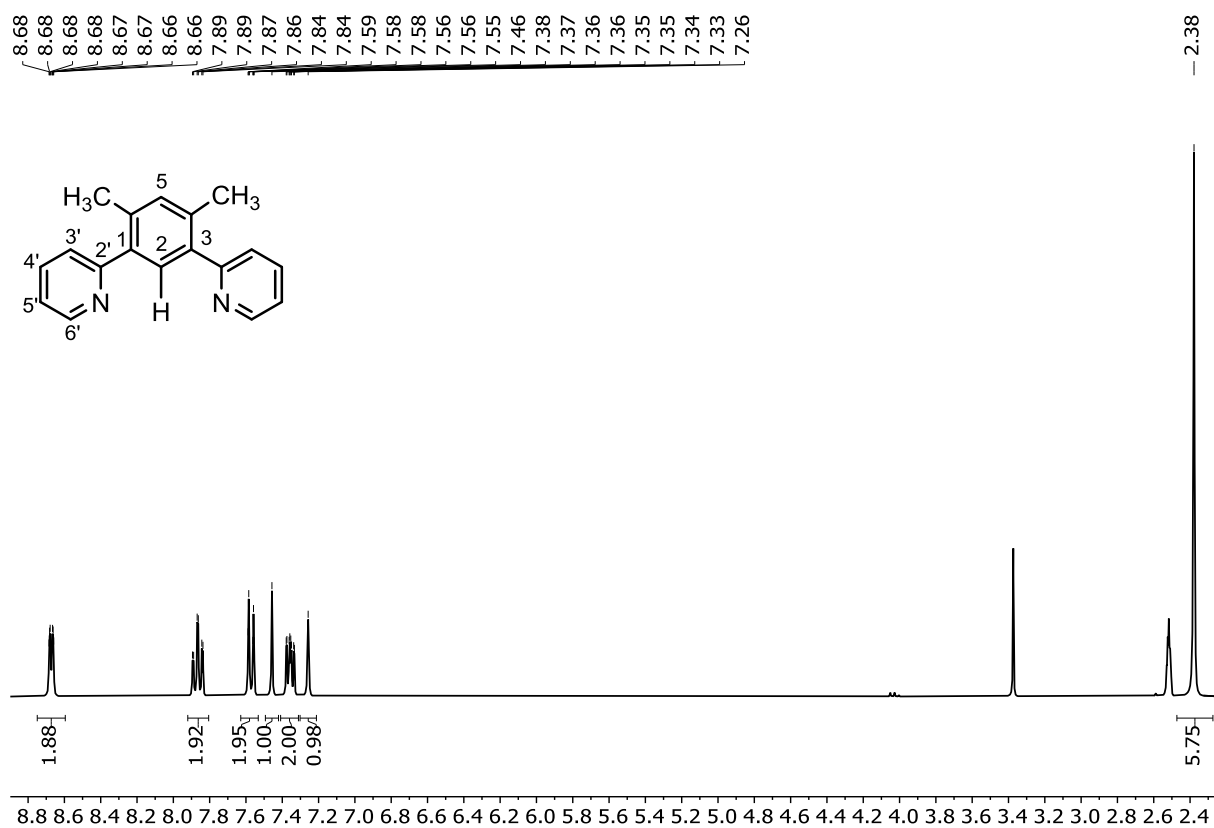

**Figure. S001.** 300 MHz <sup>1</sup>H-NMR spectrum of 1,5-di(2-pyridyl)-2,4-dimethylbenzene measured in DMSO-d<sub>6</sub> at RT.

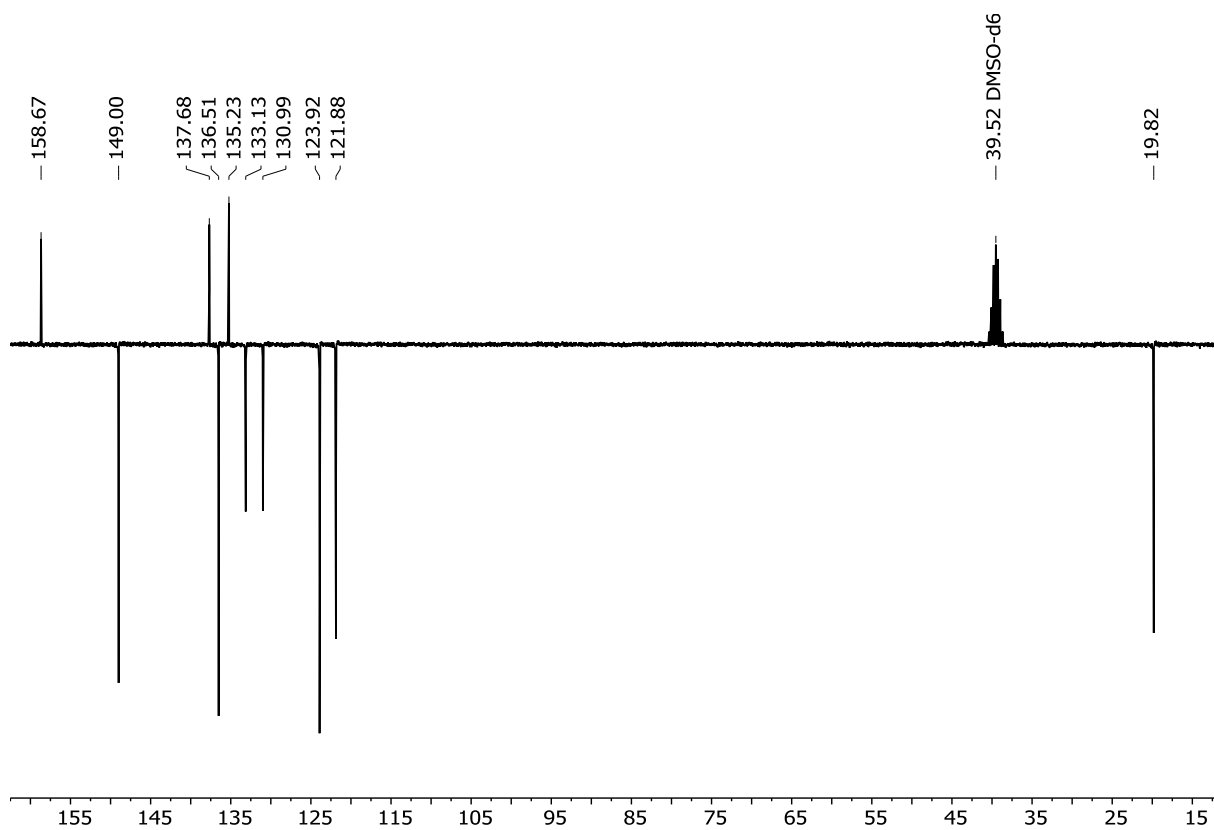

**Figure. S002.** 75 MHz <sup>13</sup>C-NMR spectrum of 1,5-di(2-pyridyl)-2,4-dimethylbenzene measured in DMSO-d<sub>6</sub> at RT.

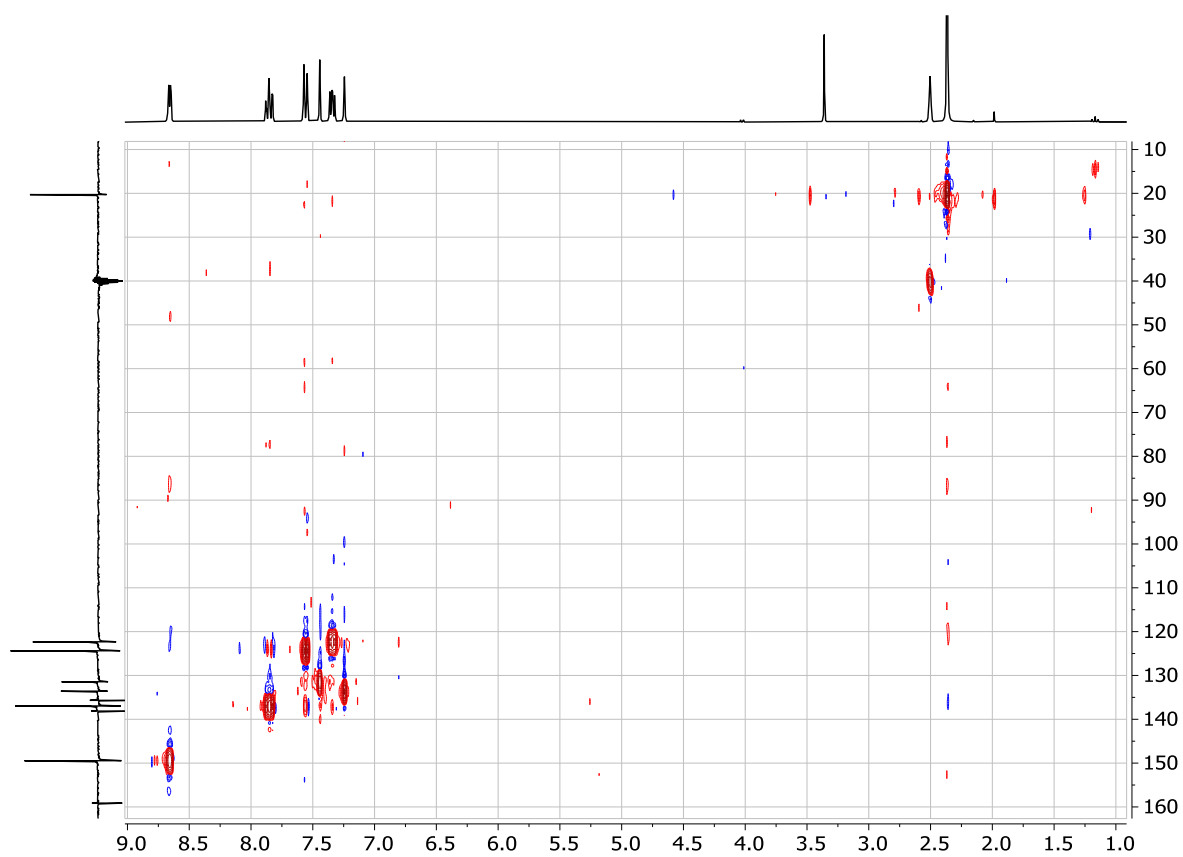

**Figure. S003.** H,C-HSQC spectrum of 1,5-di(2-pyridyl)-2,4-dimethylbenzene measured in DMSO- $d_6$  at RT.

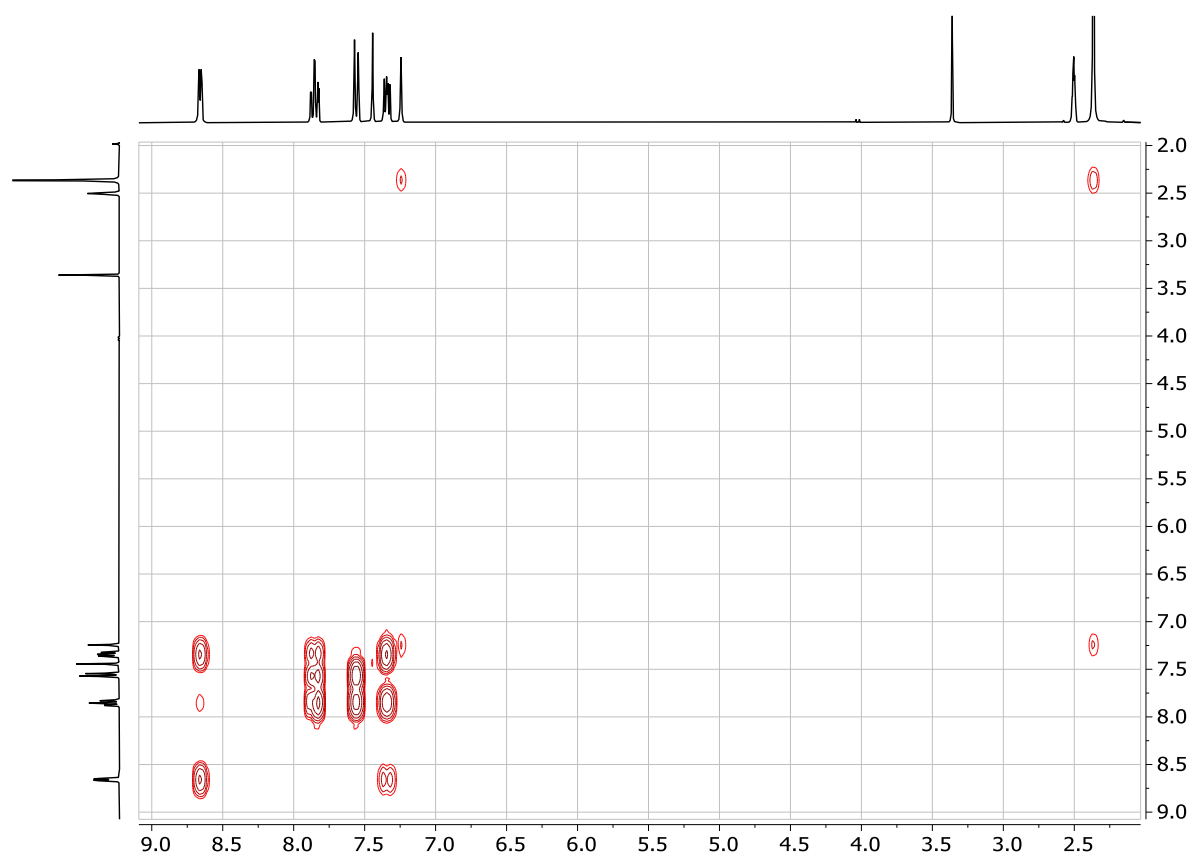

**Figure. S004.** H,H-COSY spectrum of 1,5-di(2-pyridyl)-2,4-dimethylbenzene measured in DMSO- $d_6$  at RT.

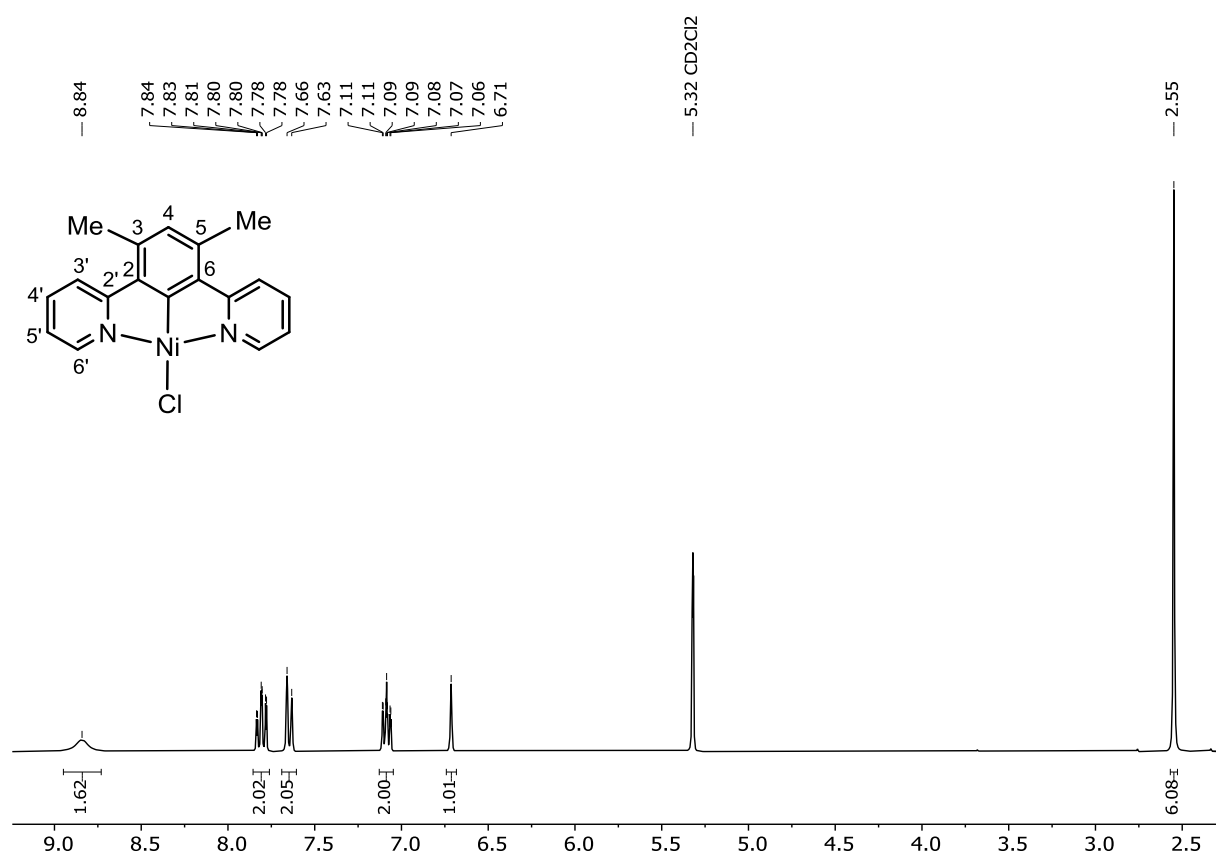

**Figure. S005.** 300 MHz  $^1\text{H}$ -NMR spectrum of  $[\text{Ni}(\text{Me}_2\text{dpb})\text{Cl}]$  measured in  $\text{CD}_2\text{Cl}_2$  at RT.

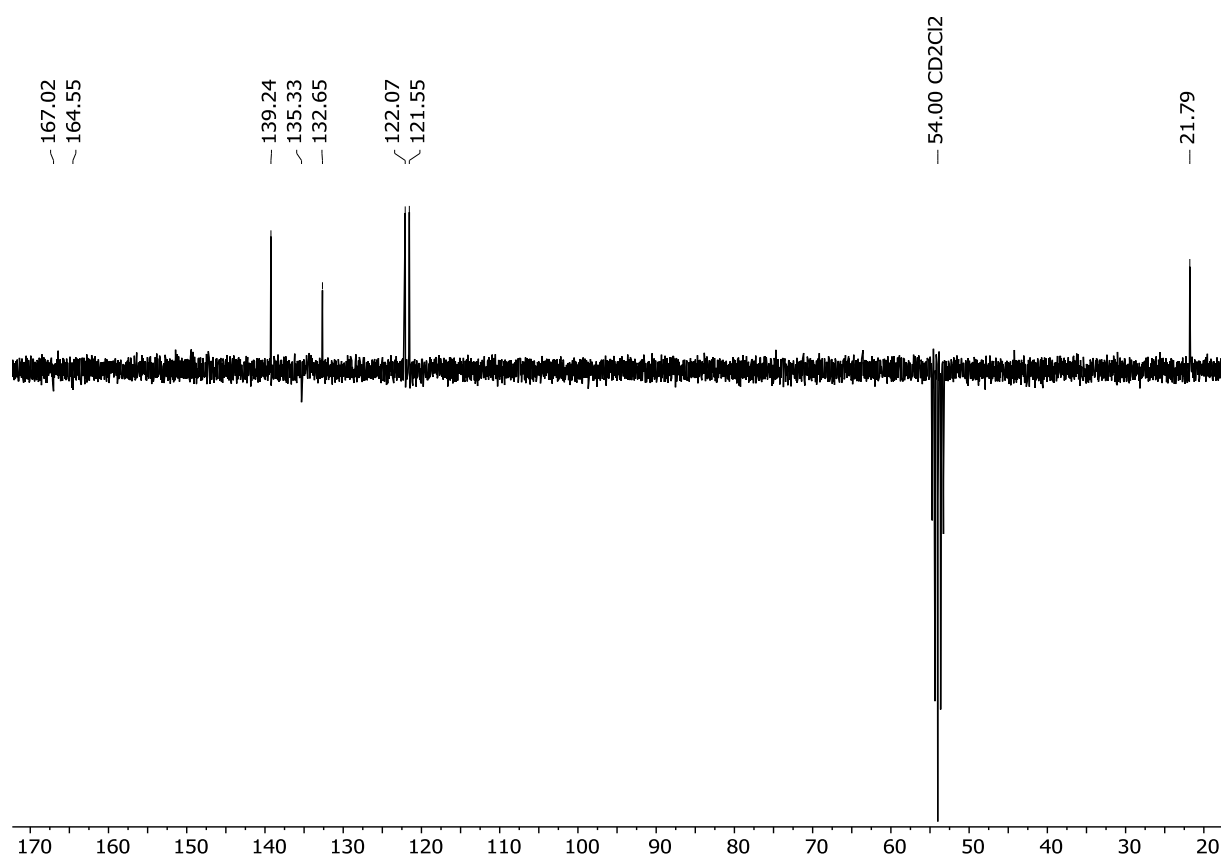

**Figure. S006.** 75 MHz  $^{13}\text{C}$ -NMR spectrum of  $[\text{Ni}(\text{Me}_2\text{dpb})\text{Cl}]$  measured in  $\text{CD}_2\text{Cl}_2$  at RT.

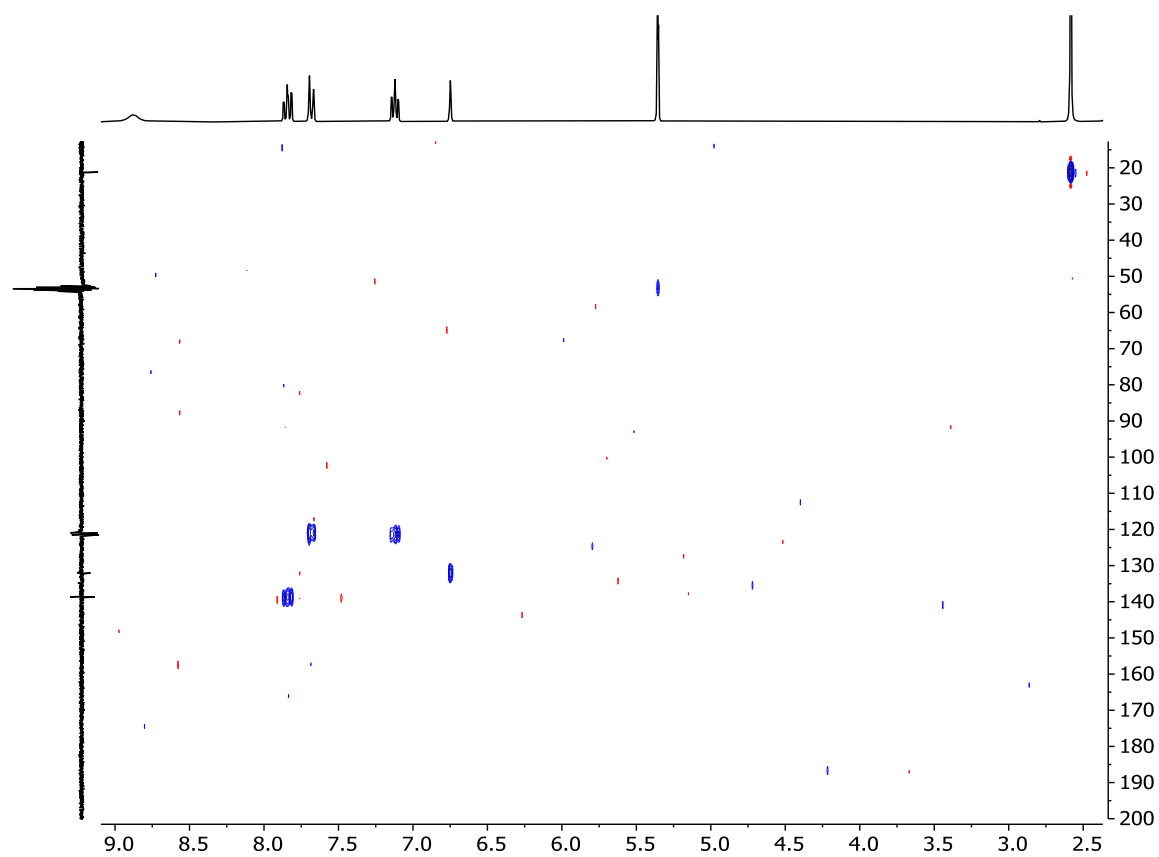

**Figure. S007.**  $H,C$ -HSQC spectrum of  $[Ni(Me_2dpb)Cl]$  measured in  $CD_2Cl_2$  at RT.

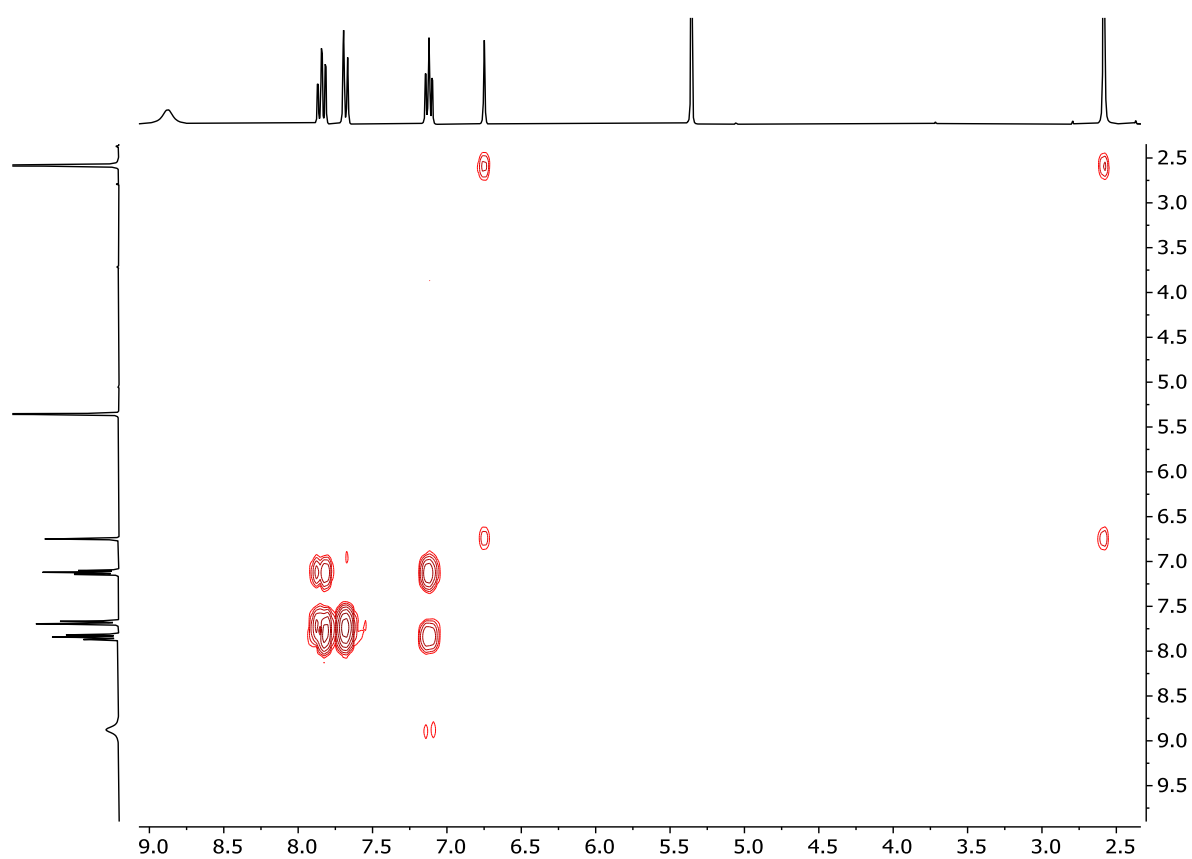

**Figure. S008.**  $H,H$ -COSY spectrum of  $[Ni(Me_2dpb)Cl]$  measured in  $CD_2Cl_2$  at RT.

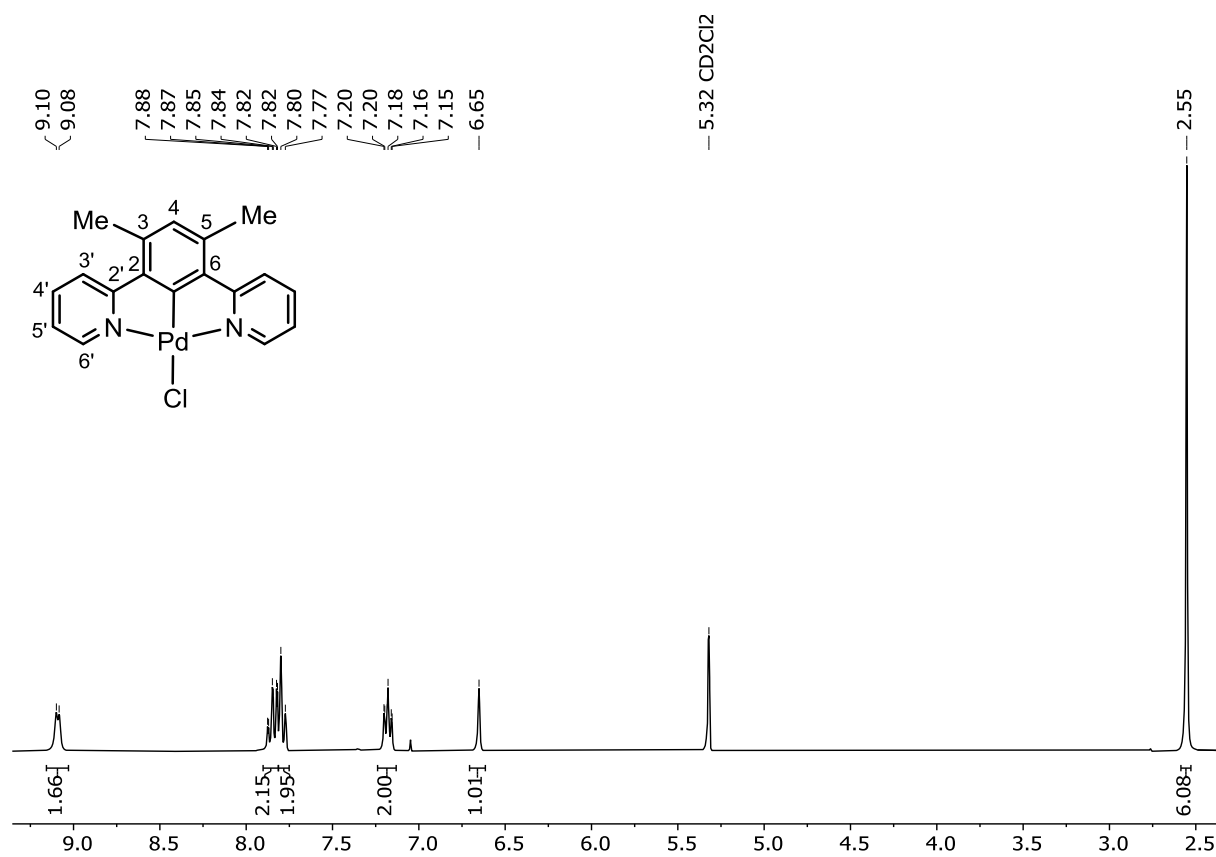

**Figure. S009.** 300 MHz <sup>1</sup>H-NMR spectrum of [Pd(Me<sub>2</sub>dpb)Cl] measured in CD<sub>2</sub>Cl<sub>2</sub> at RT.

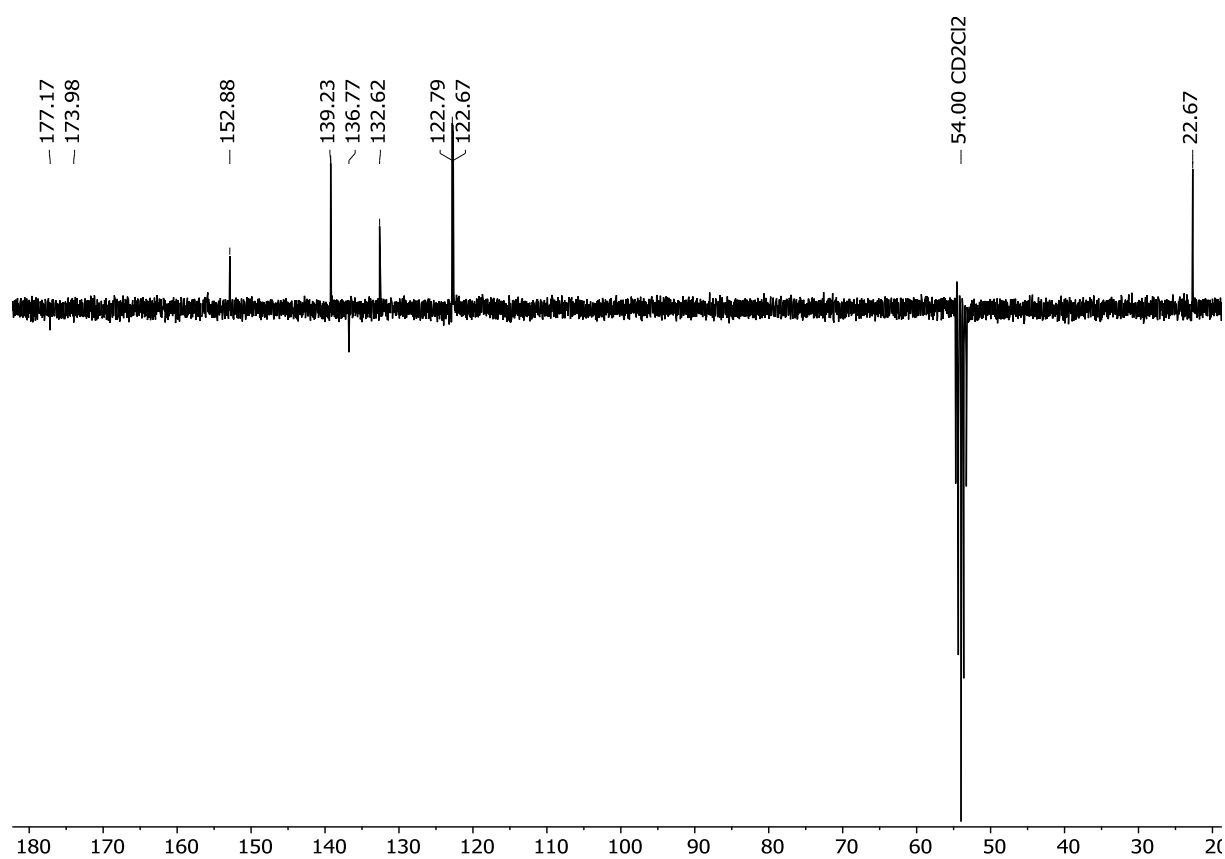

**Figure. S010.** 75 MHz <sup>13</sup>C-NMR spectrum of [Pd(Me<sub>2</sub>dpb)Cl] measured in CD<sub>2</sub>Cl<sub>2</sub> at RT.

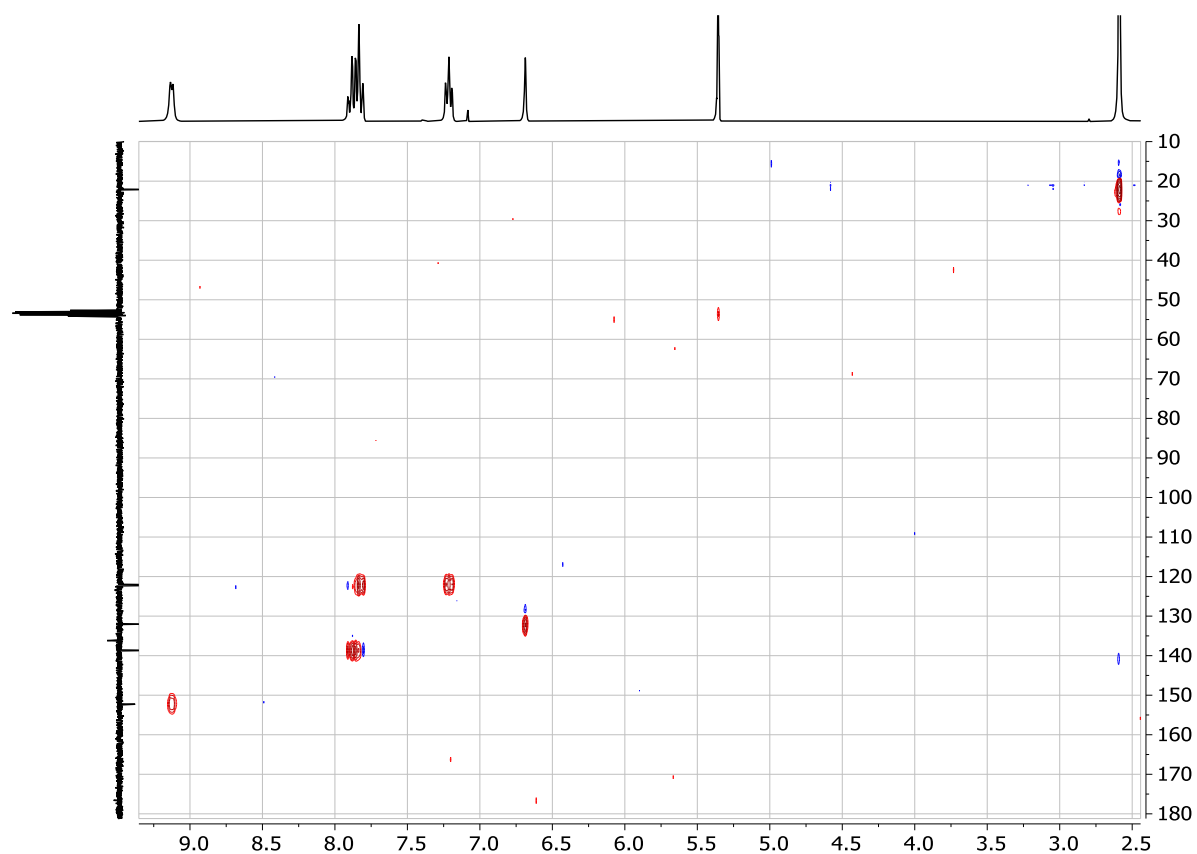

**Figure. S011.** <sup>1</sup>H,<sup>13</sup>C-HSQC spectrum of [Pd(Me<sub>2</sub>dpb)Cl] measured in CD<sub>2</sub>Cl<sub>2</sub> at RT.

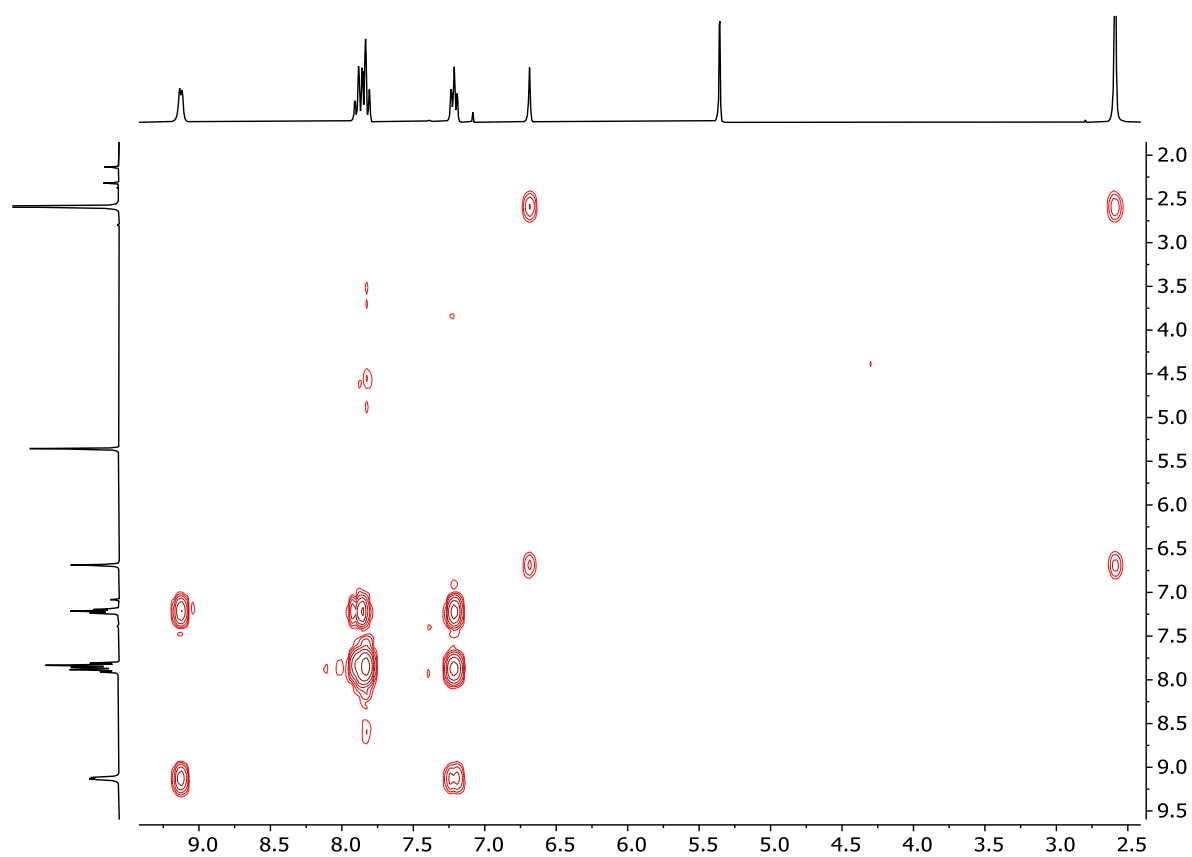

**Figure. S012.** <sup>1</sup>H,<sup>1</sup>H-COSY spectrum of [Pd(Me<sub>2</sub>dpb)Cl] measured in CD<sub>2</sub>Cl<sub>2</sub> at RT.

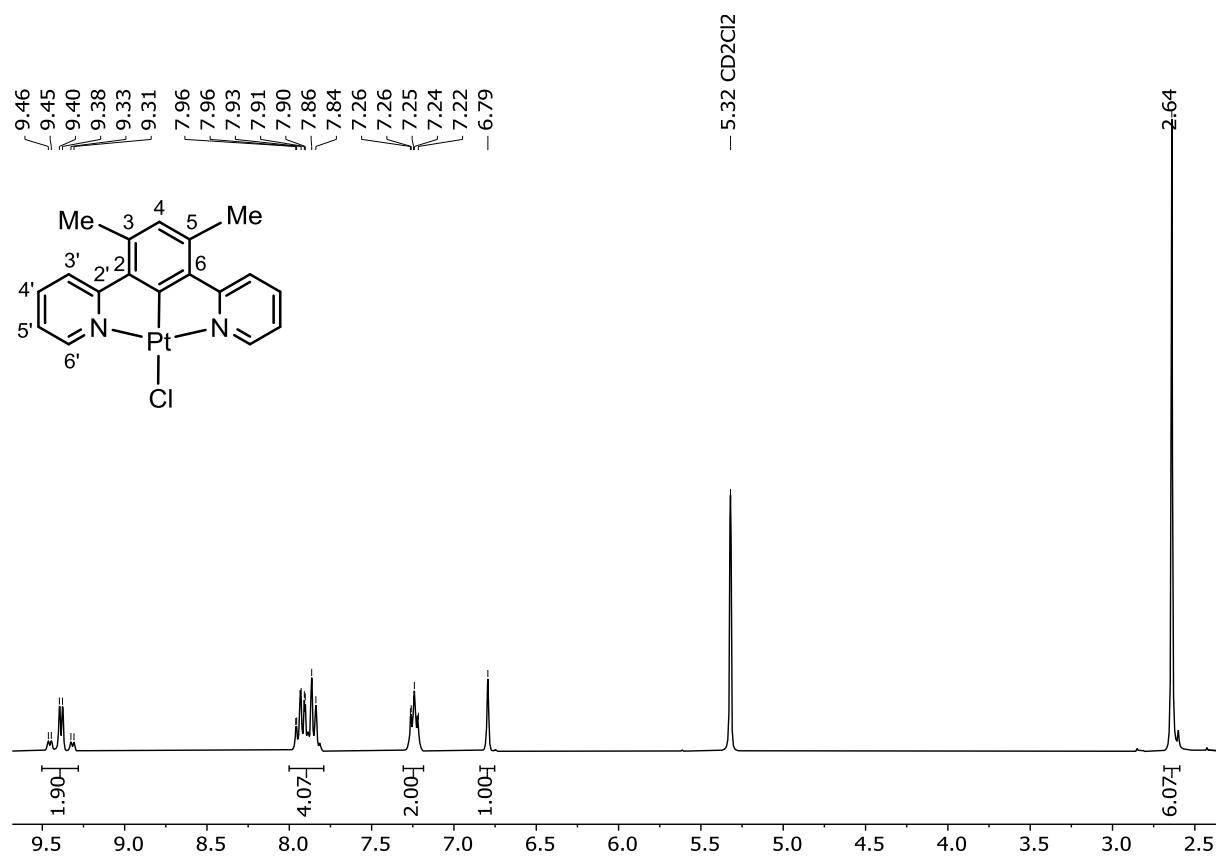

**Figure. S013.** 300 MHz <sup>1</sup>H-NMR spectrum of [Pt(Me<sub>2</sub>dtpb)Cl] measured in CD<sub>2</sub>Cl<sub>2</sub> at RT.

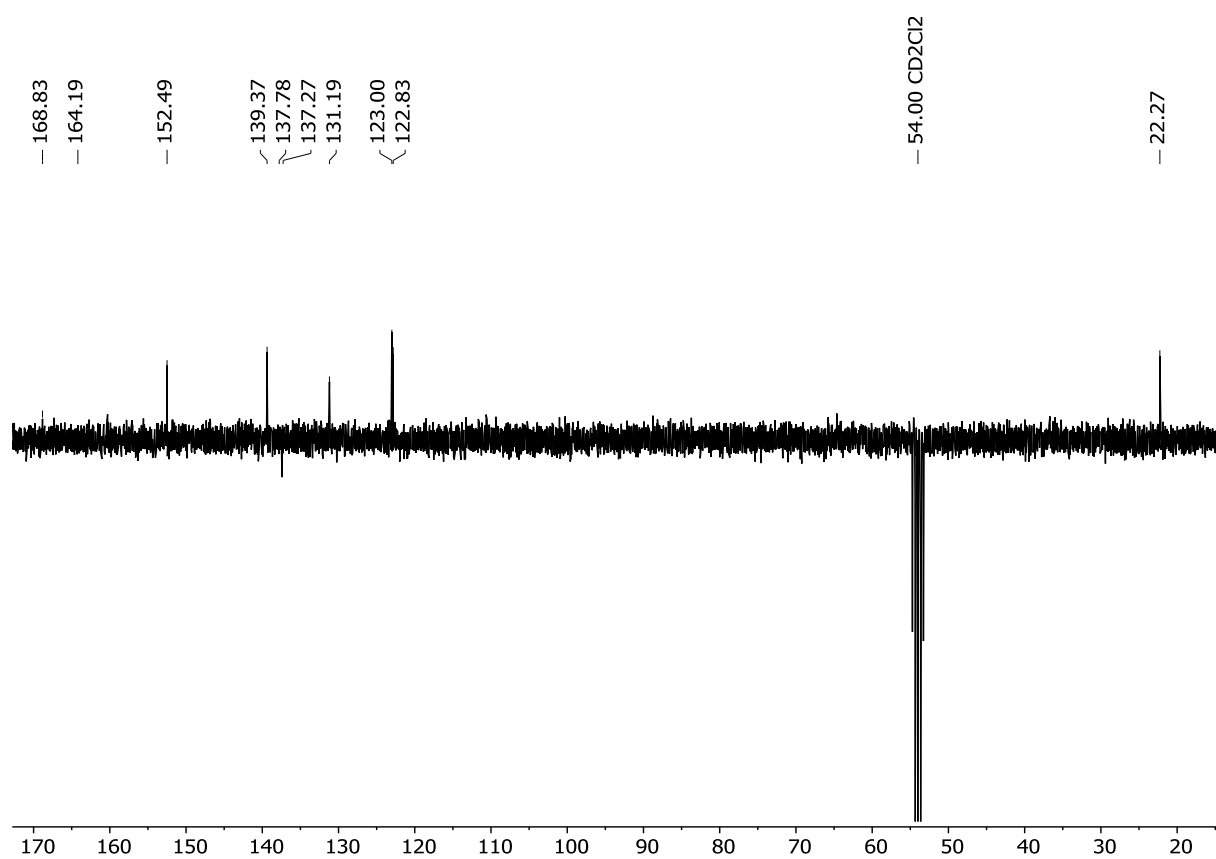

**Figure. S014.** 75 MHz <sup>13</sup>C-NMR spectrum of [Pt(Me<sub>2</sub>dtpb)Cl] measured in CD<sub>2</sub>Cl<sub>2</sub> at RT.



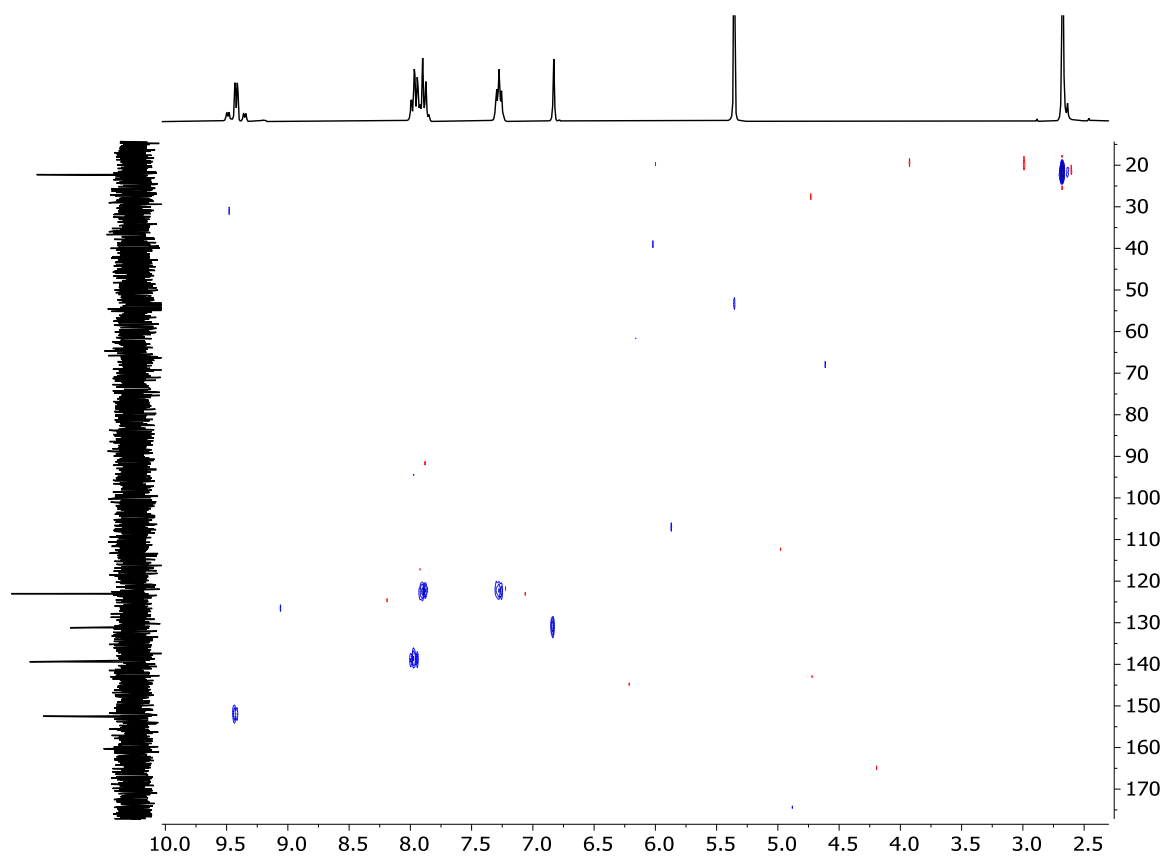

**Figure. S015.**  $H,C$ -HSQC spectrum of  $[Pt(Me_2dpb)Cl]$  measured in  $CD_2Cl_2$  at RT.

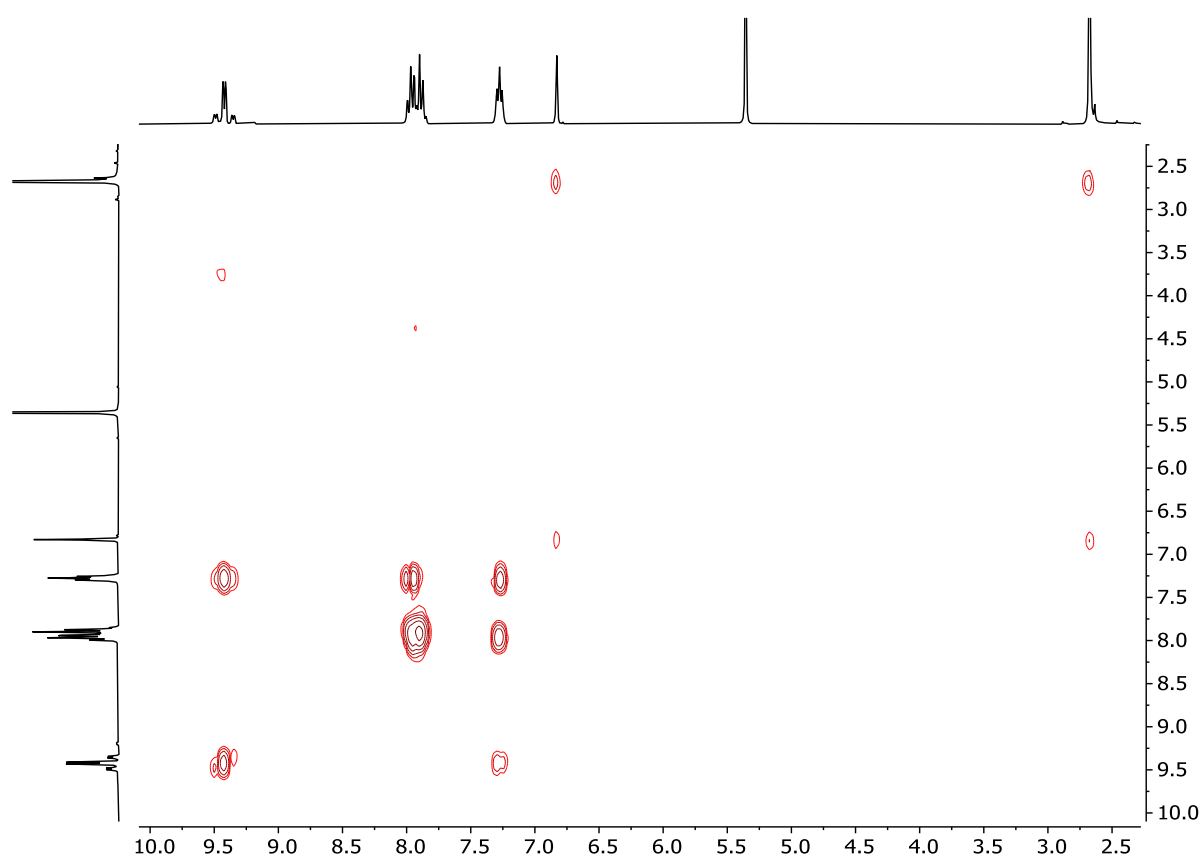

**Figure. S016.**  $H,H$ -COSY spectrum of  $[Pt(Me_2dpb)Cl]$  measured in  $CD_2Cl_2$  at RT.

— -3609.20

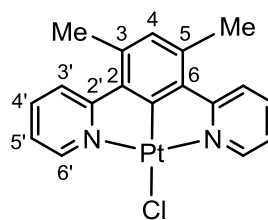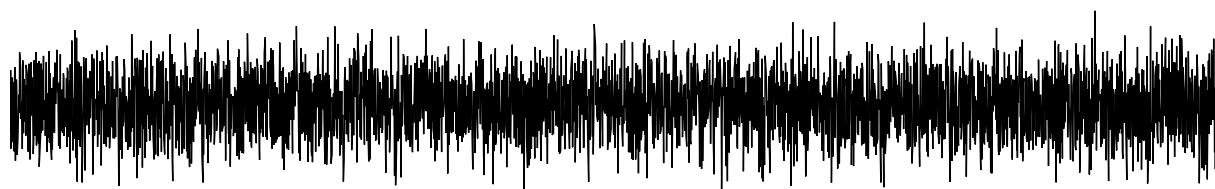

-3586 -3590 -3594 -3598 -3602 -3606 -3610 -3614 -3618 -3622 -3626 -3630 -3634

**Figure. S017.** <sup>195</sup>Pt{<sup>1</sup>H} NMR spectrum of [Pt(Me<sub>2</sub>dpb)Cl] measured in DMSO-*d*<sub>6</sub> at RT.

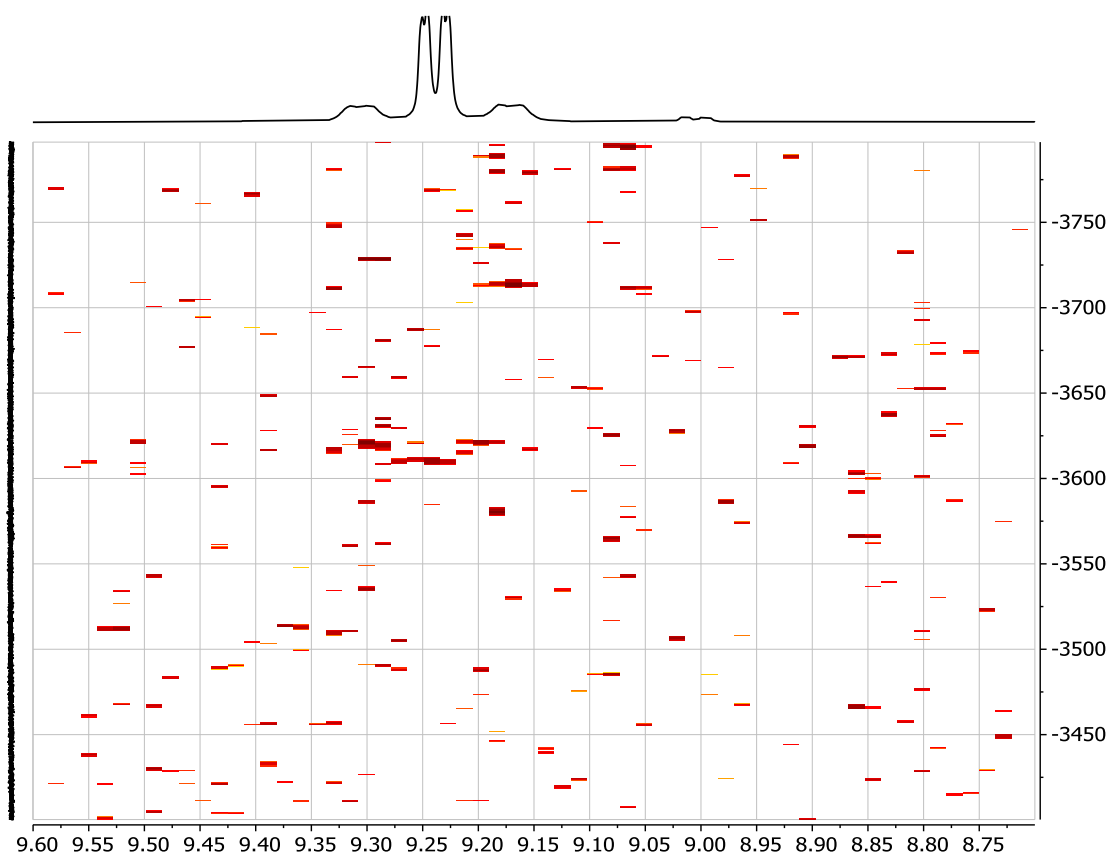

**Figure. S018.** H, Pt-HMBC spectrum of [Pt(Me<sub>2</sub>dpb)Cl] measured in DMSO-*d*<sub>6</sub> at RT.

SPEC: k1e4600 04-Dec-20 Elapse: 02:58.4 27  
 Samp: ALK 06 C18H16N2 Start: 09:36:50 28  
 Comm: EI pos 70eV  
 Mode: EI +VE +LMR BSCAN (EXP) UP LR NRM  
 Oper: A. Baum Client: L. Kletsch Inlet: 16 > 500  
 Base: 259.2 Inten: 64081152 Masses: 16 > 500  
 Norm: 259.2 RIC: 342794867 #peaks: 524  
 Peak: 1000.00 mmu

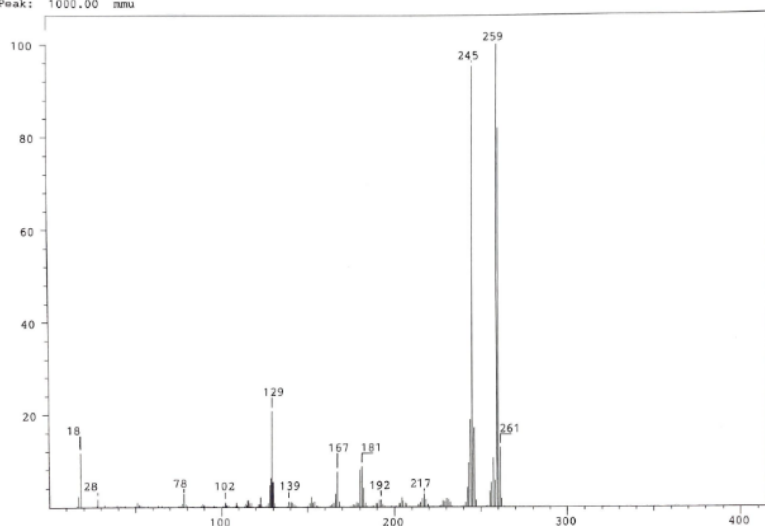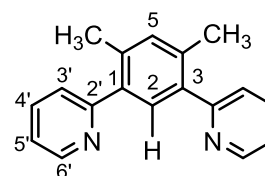

Figure. S019. MS-EI(+) of 1,5-di(2-pyridyl)-2,4-dimethylbenzene (Me<sub>2</sub>dpbH).

SPEC: k1e4598 30-Nov-20 Elapse: 07:05.4 64  
 Samp: ALK 13 C18H15N2PtCl Start: 09:56:21 65  
 Comm: EI pos 70eV  
 Mode: EI +VE +LMR BSCAN (EXP) UP LR NRM  
 Oper: A. Baum Client: L. Kletsch Inlet: 16 > 600  
 Base: 453.8 Inten: 5780745 Masses: 16 > 600  
 Norm: 453.8 RIC: 83289886 #peaks: 710  
 Peak: 1000.00 mmu

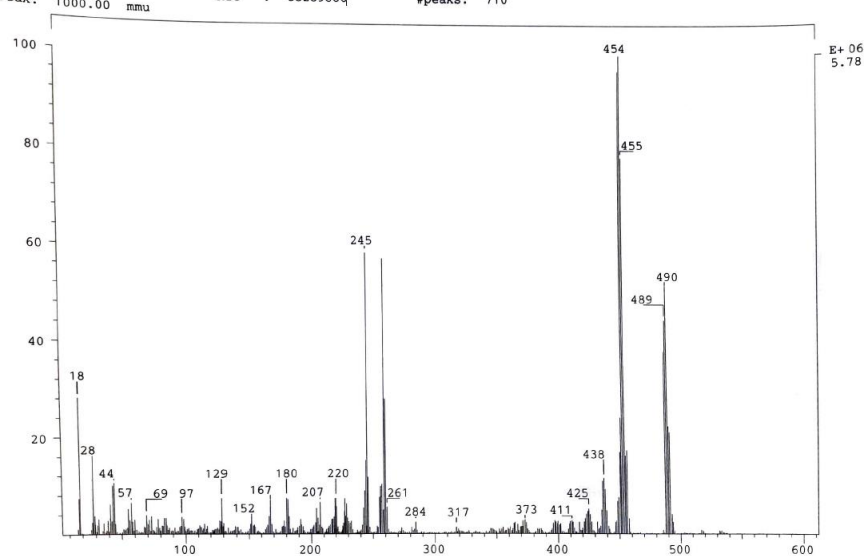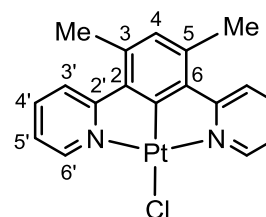

SPEC: k1e4598 30-Nov-20 Elapse: 05:08.3 46  
 Samp: ALK 13 C18H15N2PtCl Start: 09:56:21 65  
 Comm: EI pos 70eV  
 Mode: EI +VE +LMR BSCAN (EXP) UP LR NRM  
 Oper: A. Baum Client: L. Kletsch Inlet: 16 > 600  
 Base: 18.2 Inten: 1586063 Masses: 16 > 600  
 Norm: 453.8 RIC: 15687393 #peaks: 640  
 Peak: 1000.00 mmu

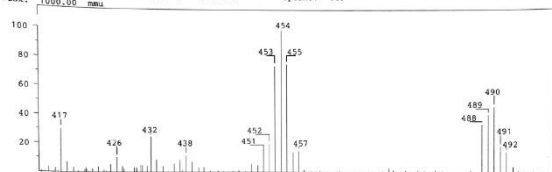

SPEC: k1e4598 30-Nov-20 Elapse: 06:26.4 58  
 Samp: ALK 13 C18H15N2PtCl Start: 09:56:21 65  
 Comm: EI pos 70eV  
 Mode: EI +VE +LMR BSCAN (EXP) UP LR NRM  
 Oper: A. Baum Client: L. Kletsch Inlet: 16 > 600  
 Base: 245.3 Inten: 4283544 Masses: 16 > 600  
 Norm: 489.7 RIC: 69849582 #peaks: 715  
 Peak: 1000.00 mmu

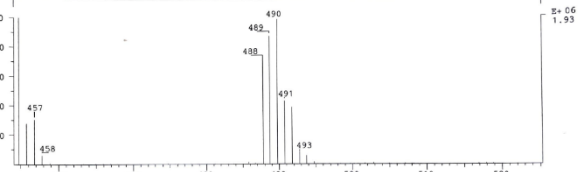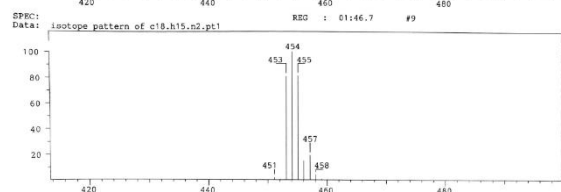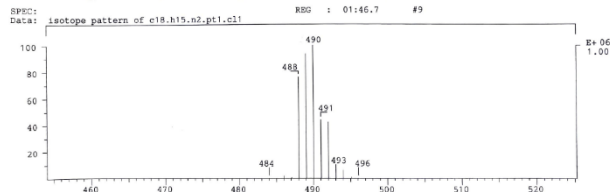

Figure. S020. MS-EI(+) of [Pt(Me<sub>2</sub>dpb)Cl].

SPEC: kle4595 27-Nov-20 Elapse: 07:41.0 73  
 Samp: ALK 09 C18H15N2PdCl Start: 09:20:21 74  
 Comm: EI pos 70eV  
 Mode: EI +VE +LMR BSCAN (EXP) UP LR NRM  
 Oper: A. Baum Client: L. Kletsch Inlet :  
 Base: 365.0 Inten: 5076796 Masses: 16 > 500  
 Norm: 365.0 RIC: 50336045 #peaks: 544  
 Peak: 1000.00 mmu

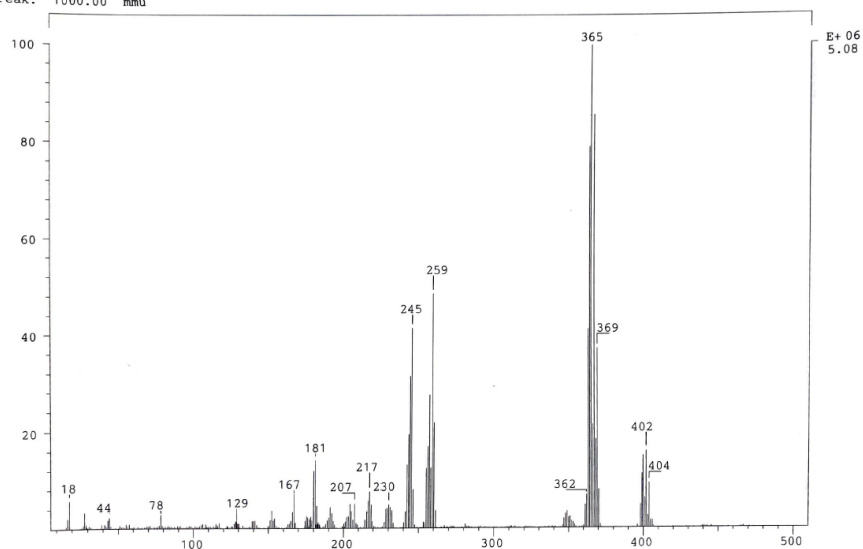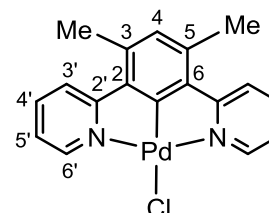

SPEC: kle4595 27-Nov-20 Elapse: 07:16.3 69  
 Samp: ALK 09 C18H15N2PdCl Start: 09:20:21 74  
 Comm: EI pos 70eV  
 Mode: EI +VE +LMR BSCAN (EXP) UP LR NRM  
 Oper: A. Baum Client: L. Kletsch Inlet :  
 Base: 365.1 Inten: 1471843 Masses: 16 > 500  
 Norm: 365.1 RIC: 16976970 #peaks: 418  
 Peak: 1000.00 mmu

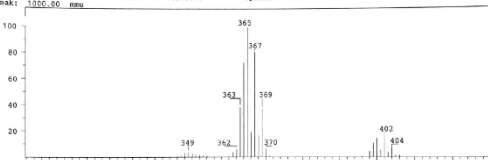

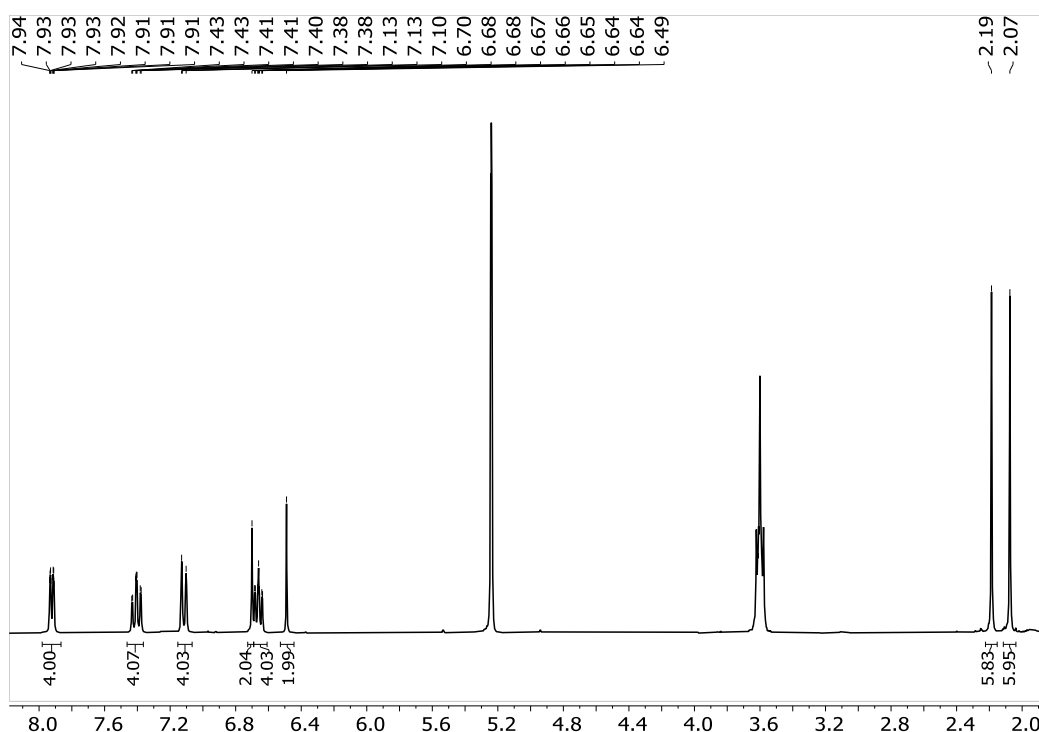

**Figure S023.** 300 MHz  $^1\text{H}$  NMR spectrum of  $[\text{Pd}_4(\mu\text{-}\kappa^2, \kappa^2\text{dpb})_2(\mu\text{-}\kappa^1, \kappa^1\text{-OAc})_4]$  in  $\text{CD}_2\text{Cl}_2$  (synthetic route using  $\text{PdCl}_2$ ).

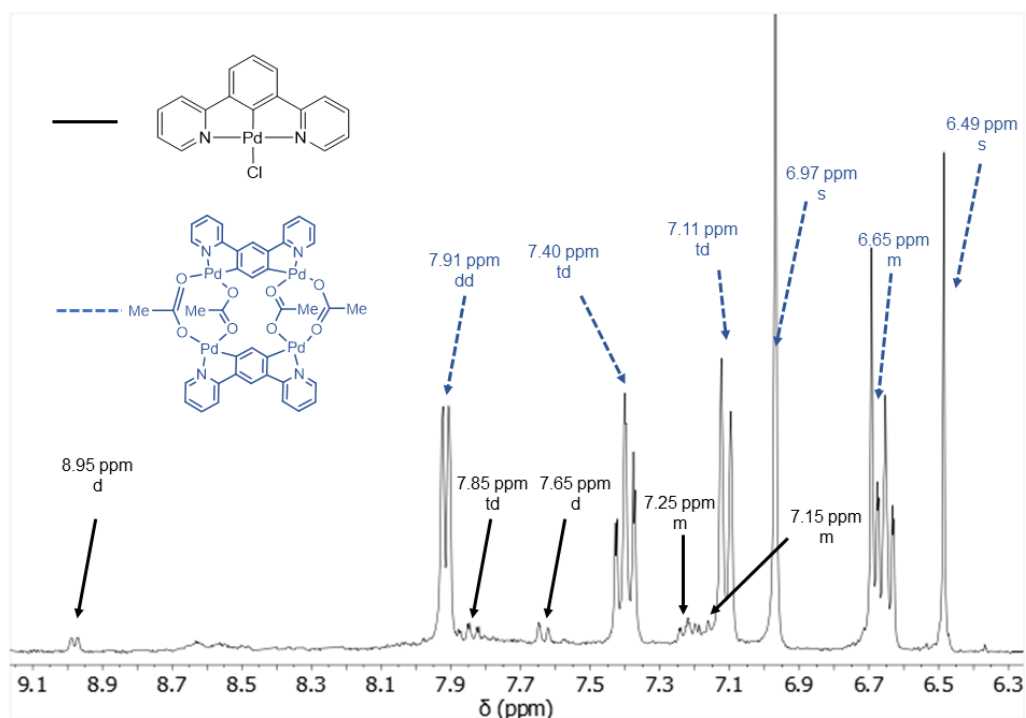

**Figure S024.** 300 MHz  $^1\text{H}$  NMR spectrum of  $[\text{Pd}_4(\mu\text{-}\kappa^2, \kappa^2\text{dpb})_2(\mu\text{-}\kappa^1, \kappa^1\text{-OAc})_4]$  with traces of  $[\text{Pd}(\text{PyPhPy})\text{Cl}]$  in  $\text{CD}_2\text{Cl}_2$  (synthetic route using  $[(\text{COD})\text{PdCl}_2]$ ).

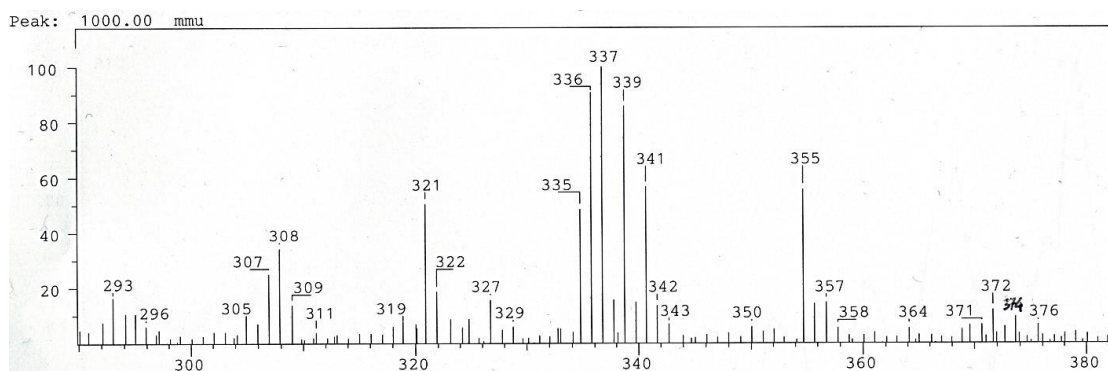

**Figure S025.** EI-MS(+) of the product mixture of  $[\text{Pd}_4(\mu\text{-}\kappa^2, \kappa^2\text{dpb})_2(\mu\text{-}\kappa^1, \kappa^1\text{-OAc})_4]$  with traces of  $[\text{Pd}(\text{dpb})\text{Cl}]$ .

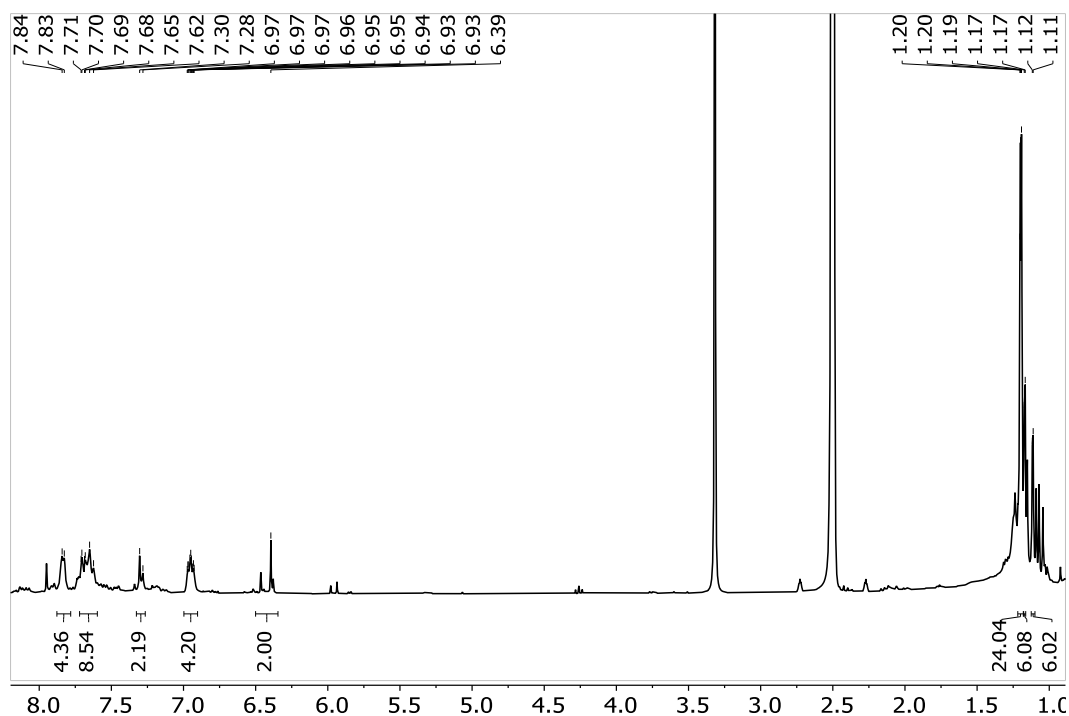

**Figure S026.** 300 MHz  $^1\text{H}$  NMR spectrum of  $[\text{Pd}_4(\mu\text{-}\kappa^2, \kappa^2\text{dpb})_2(\mu\text{-}\kappa^1, \kappa^1\text{-OPiv})_4]$  in  $\text{DMSO-d}_6$ .

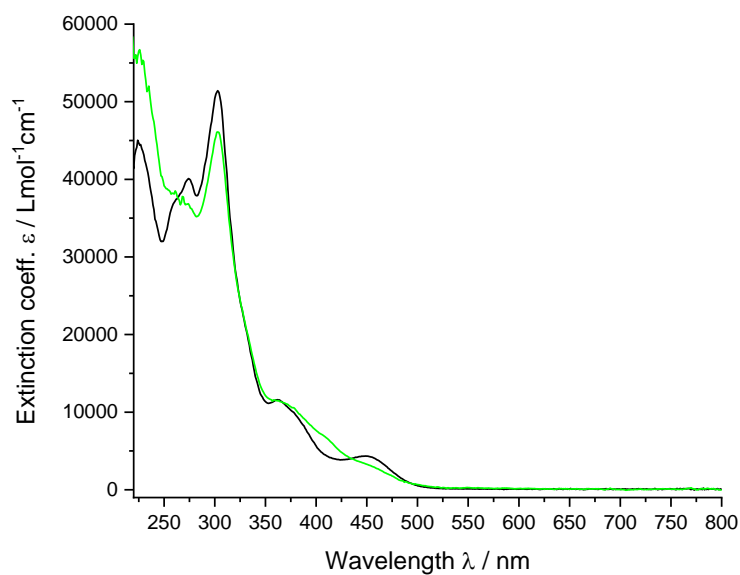

**Figure S027.** UV-vis absorption spectra of  $[\text{Pd}_4(\mu\text{-}\kappa^2, \kappa^2\text{dpb})_2(\mu\text{-}\kappa^1, \kappa^1\text{-OAc})_4]$  (black) and  $[\text{Pd}_4(\mu\text{-}\kappa^2, \kappa^2\text{dpb})_2(\mu\text{-}\kappa^1, \kappa^1\text{-OPiv})_4]$  (green) in THF.
